# Supplementary material for: Intramolecular direct aldol reactions of sugar 2,7-diketones: syntheses of hydroxylated cycloalka(e)nones
Source: Royal Society of Chemistry journal article supplement (doi:10.1039/c5ob00253b), 2015-01-01

## Supporting Information

### Intramolecular Direct Aldol Reactions of Sugar

#### 2,7-Diketones:

### Syntheses of Hydroxylated Cycloalka(e)nones

Tony K. M. Shing,\* Hau M. Cheng

*Departments of Chemistry, Center of Novel Functional Molecules*

*The Chinese University of Hong Kong, Shatin, Hong Kong.*

#### Contents

|        |                                                                                       |
|--------|---------------------------------------------------------------------------------------|
| S2     | General experimental procedures                                                       |
| S3     | X-ray crystallographic structure of <b>27</b>                                         |
| S4-S47 | <sup>1</sup> H, <sup>13</sup> C and DEPT NMR Spectra of compounds <b>10-19, 21-32</b> |

## General experimental Procedures

Melting points were uncorrected. Optical rotations were obtained with a polarimeter operating at 589nm. Infrared spectra (IR) were recorded with a FT-IR spectrophotometer as thin film on potassium bromide discs. Nuclear magnetic resonance (NMR) spectra were measured at 300.13 MHz ( $^1\text{H}$ ) or at 75.47 MHz ( $^{13}\text{C}$ ) in  $\text{CDCl}_3$  solutions, unless stated otherwise. All chemical shifts were recorded in ppm relative to tetramethylsilane ( $\delta = 0.0$ ). Spin-spin coupling constants ( $J$  value) recorded in Hz were measured directly from the spectra. All reactions were monitored by analytical thin-layer chromatography (TLC) on aluminium-precoated plates of silica gel with detection by spraying with 5% (w/v) dodecamolybdophosphoric acid in ethanol or 5% (w/v) ninhydrin in ethanol and subsequent heating. Silica gel (230–400 mesh) was used for flash chromatography. All reagents and solvents were general reagent grade unless otherwise stated. DMF was dried by magnesium sulfate, filtered and was then freshly distilled under reduced pressure. Acetonitrile was freshly distilled from  $\text{P}_2\text{O}_5$  under nitrogen. THF was freshly distilled from Na/benzophenone ketyl under nitrogen. Dichloromethane and chloroform were freshly distilled from  $\text{P}_2\text{O}_5$  under nitrogen. Diethyl ether was freshly distilled from K/benzophenone ketyl under nitrogen. Other reagents were purchased from commercial suppliers and were used without purification.

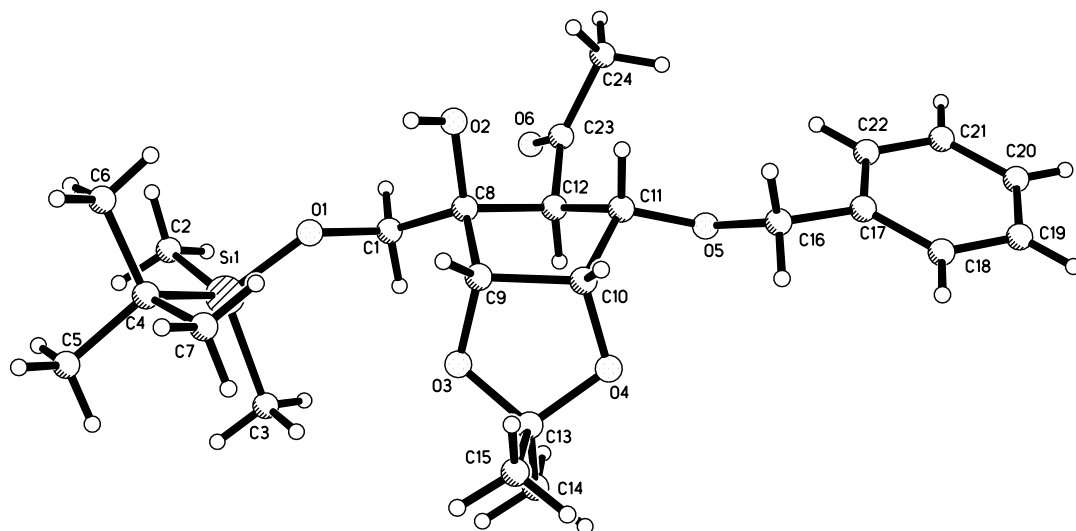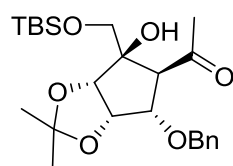

**27**

**Figure S1.** X-ray crystallographic structure of **27**.



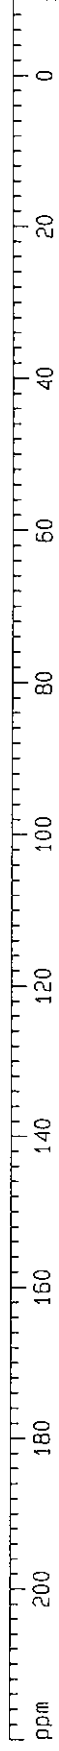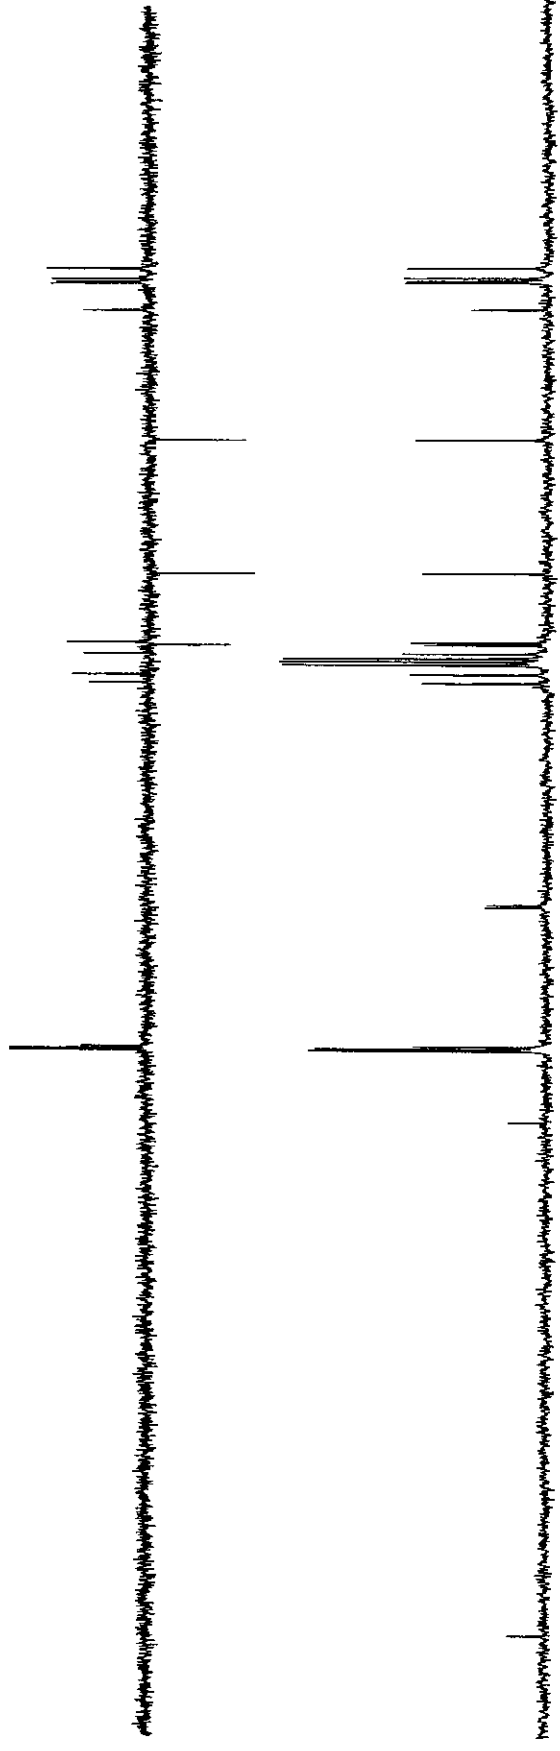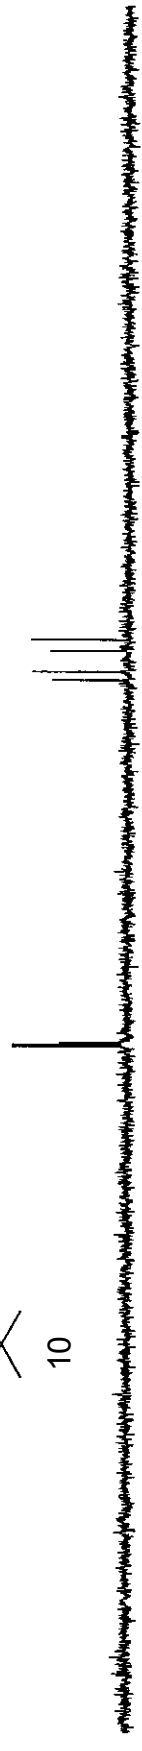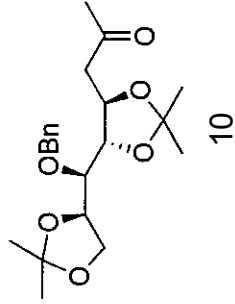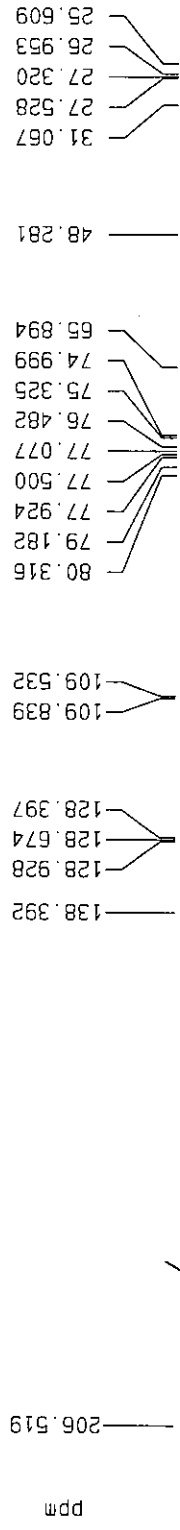

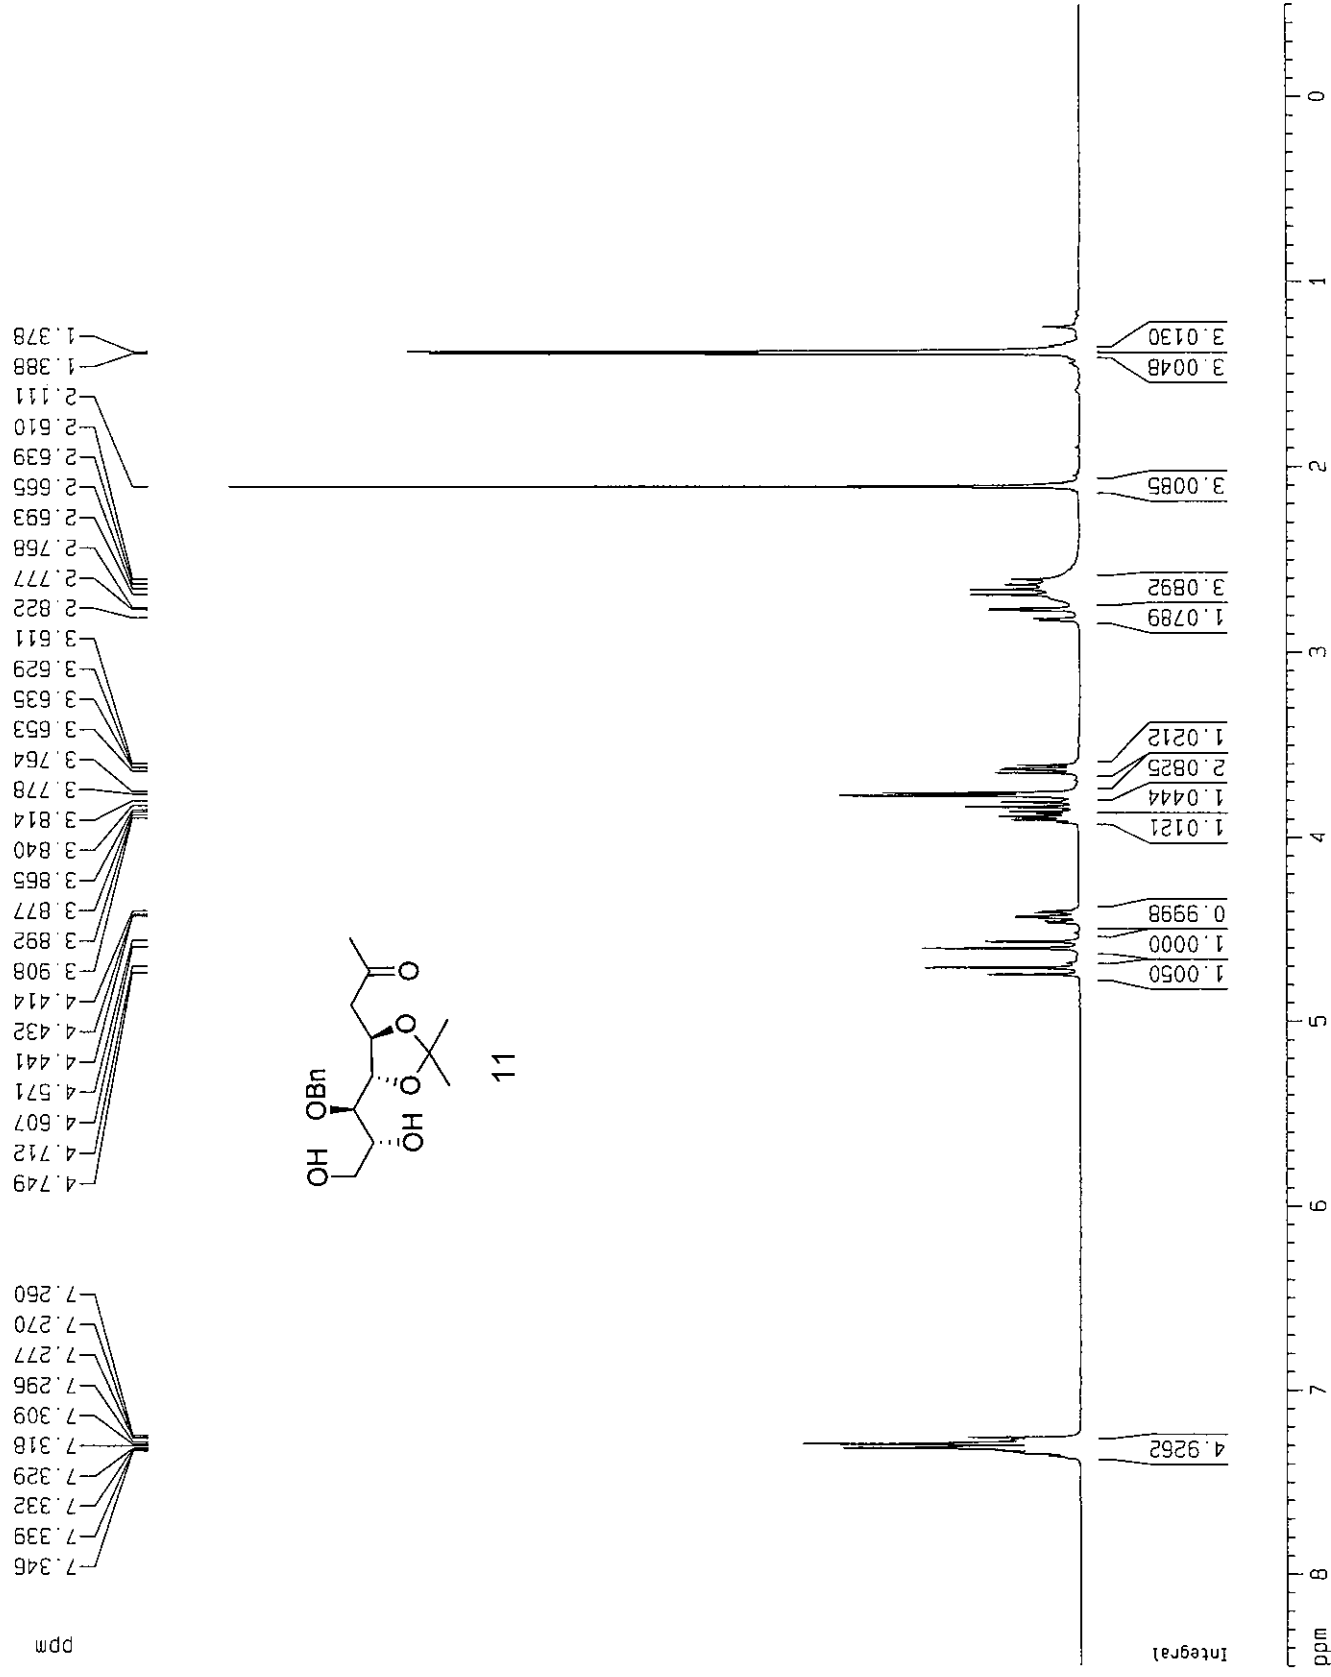

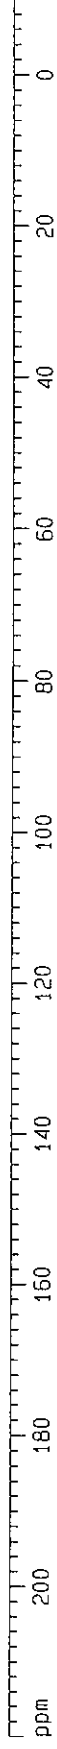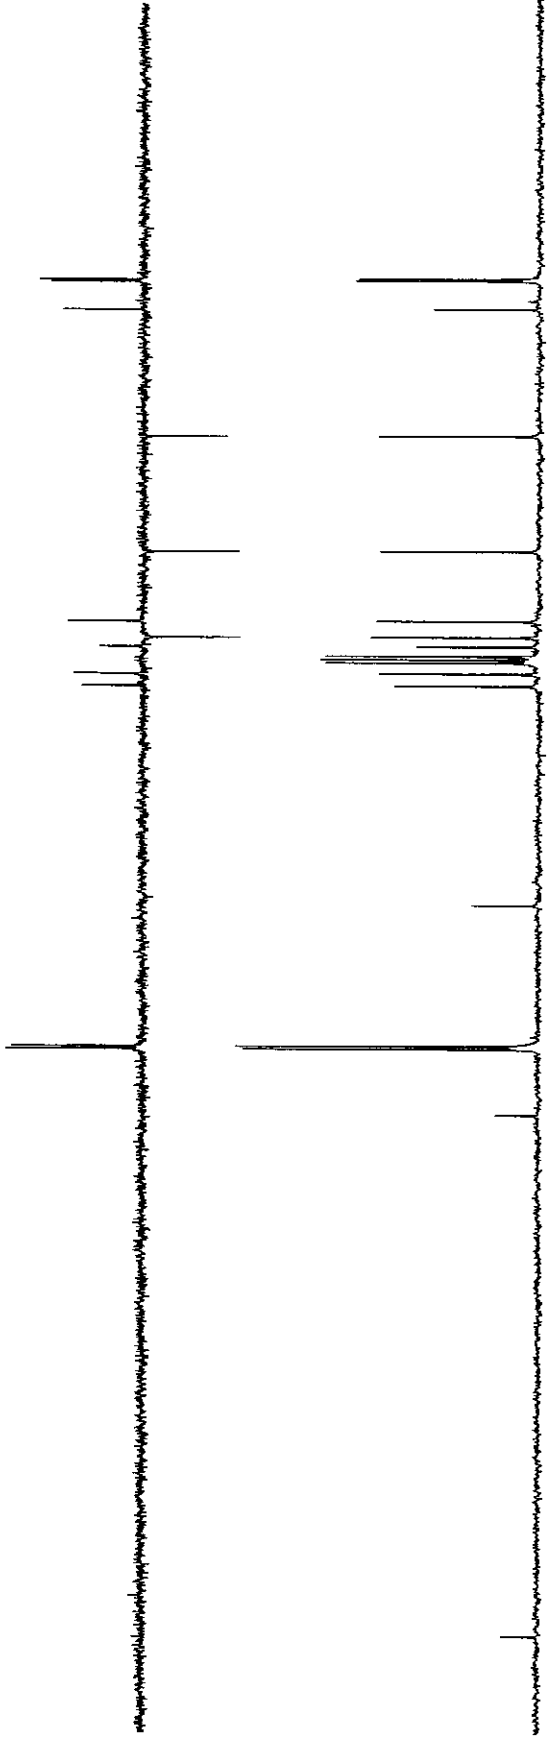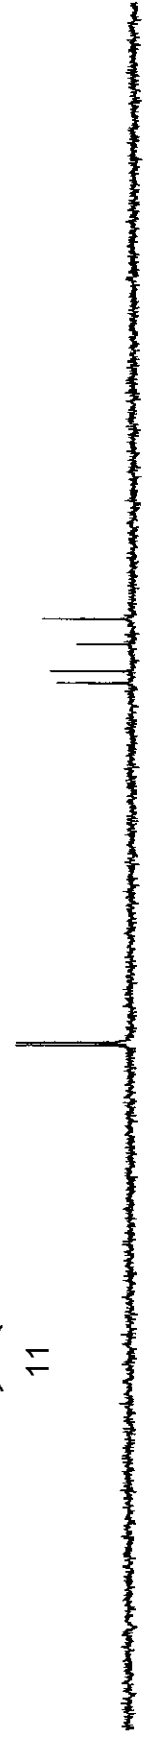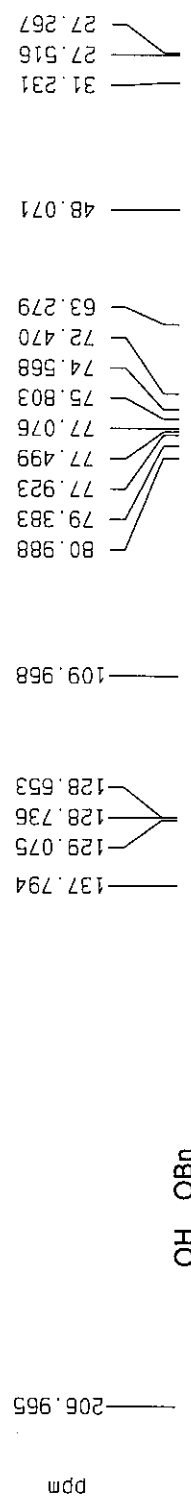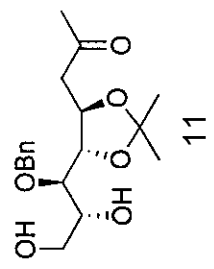

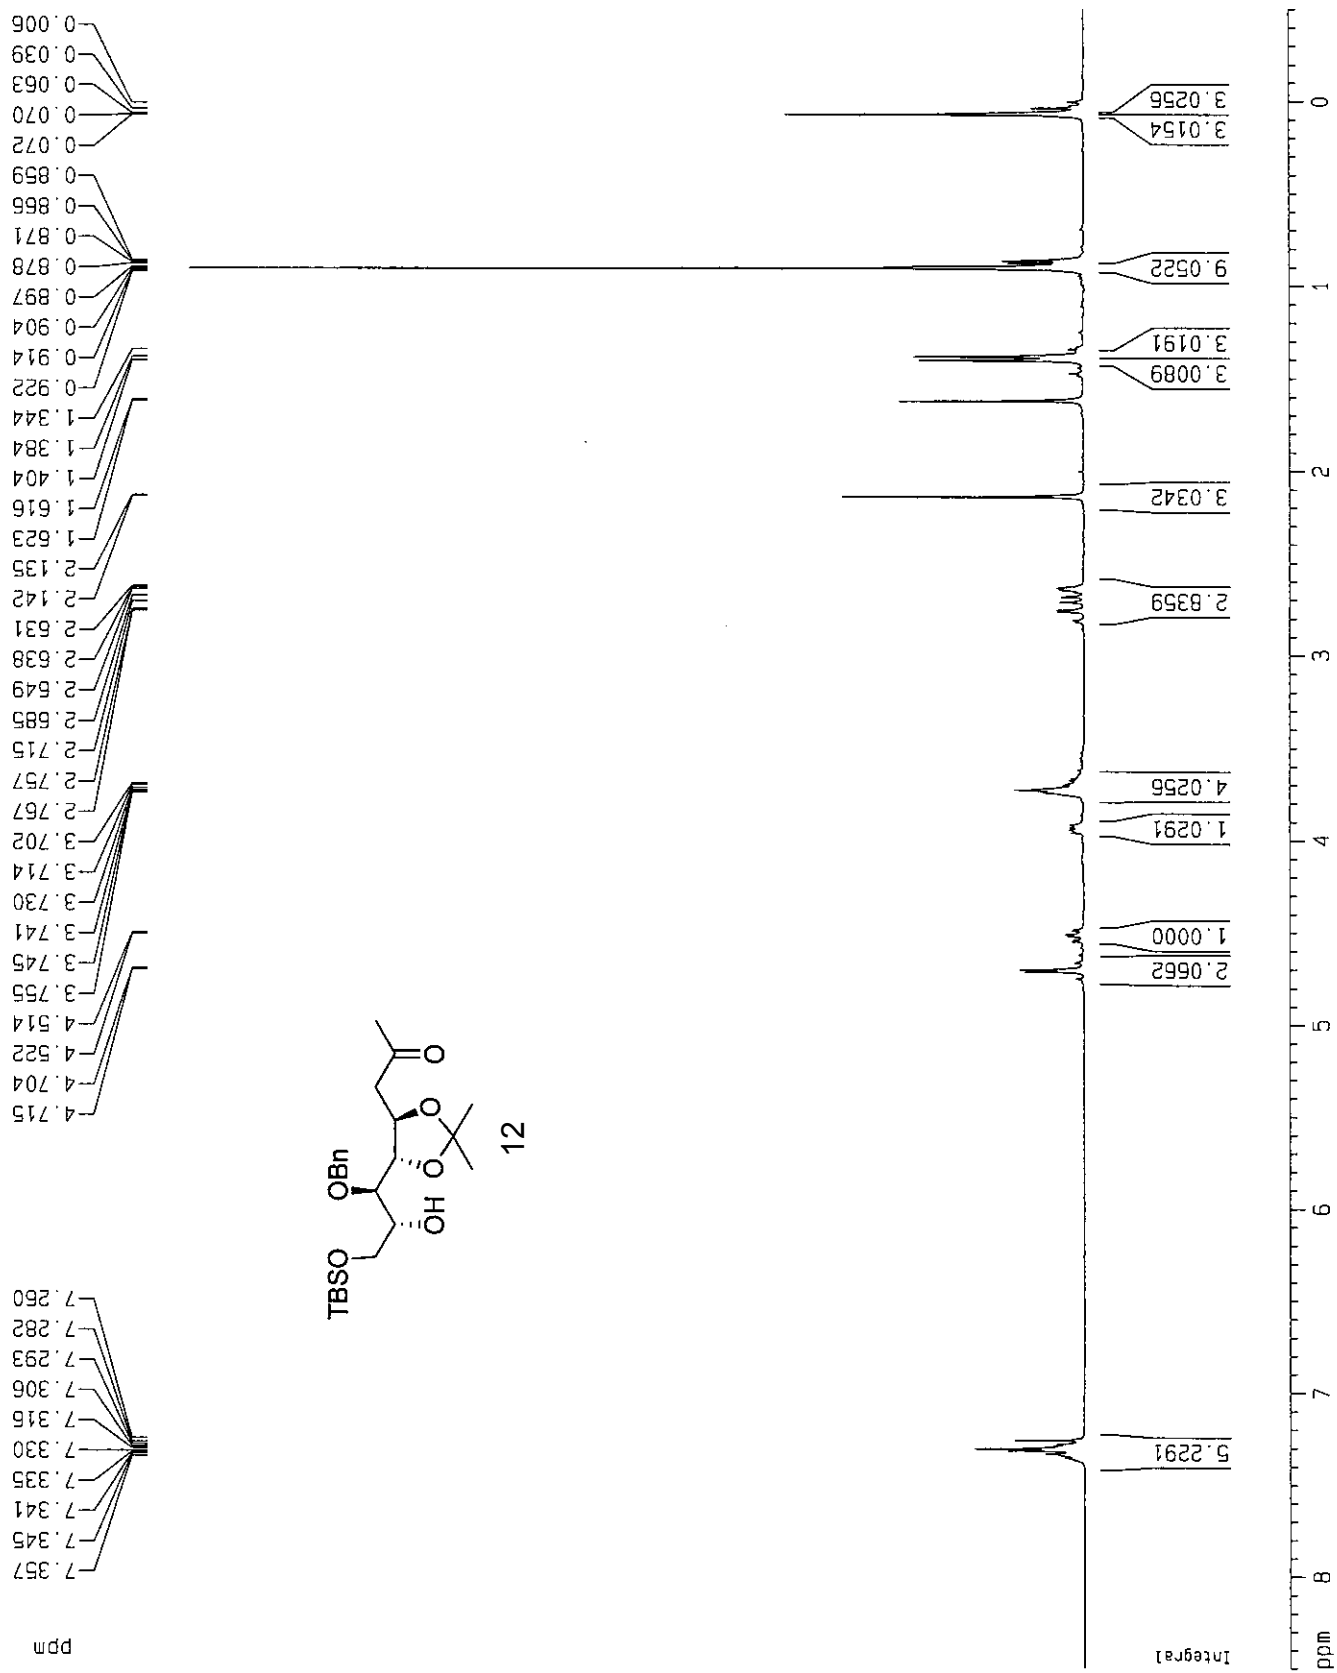



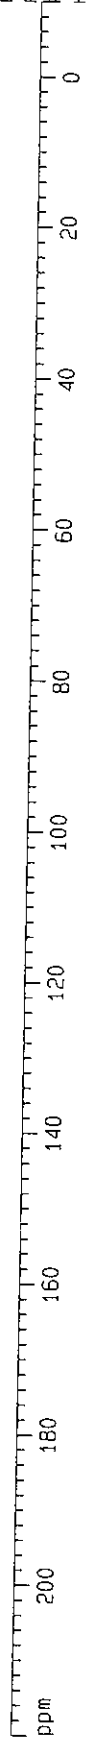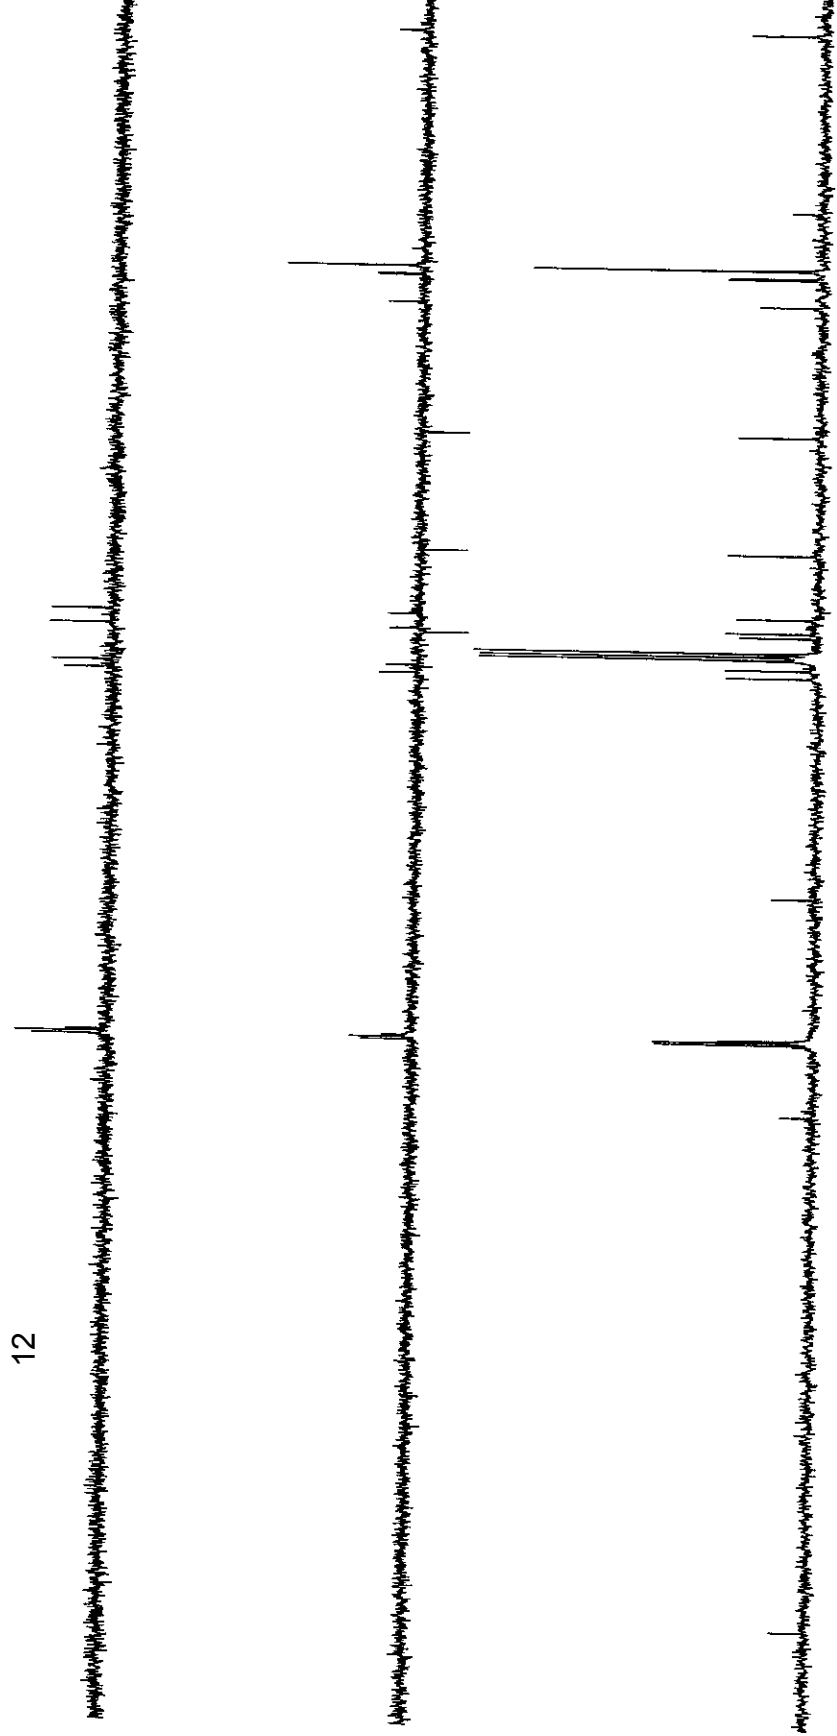

12

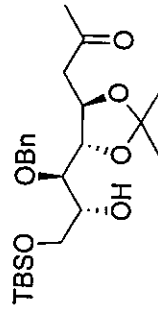

ppm

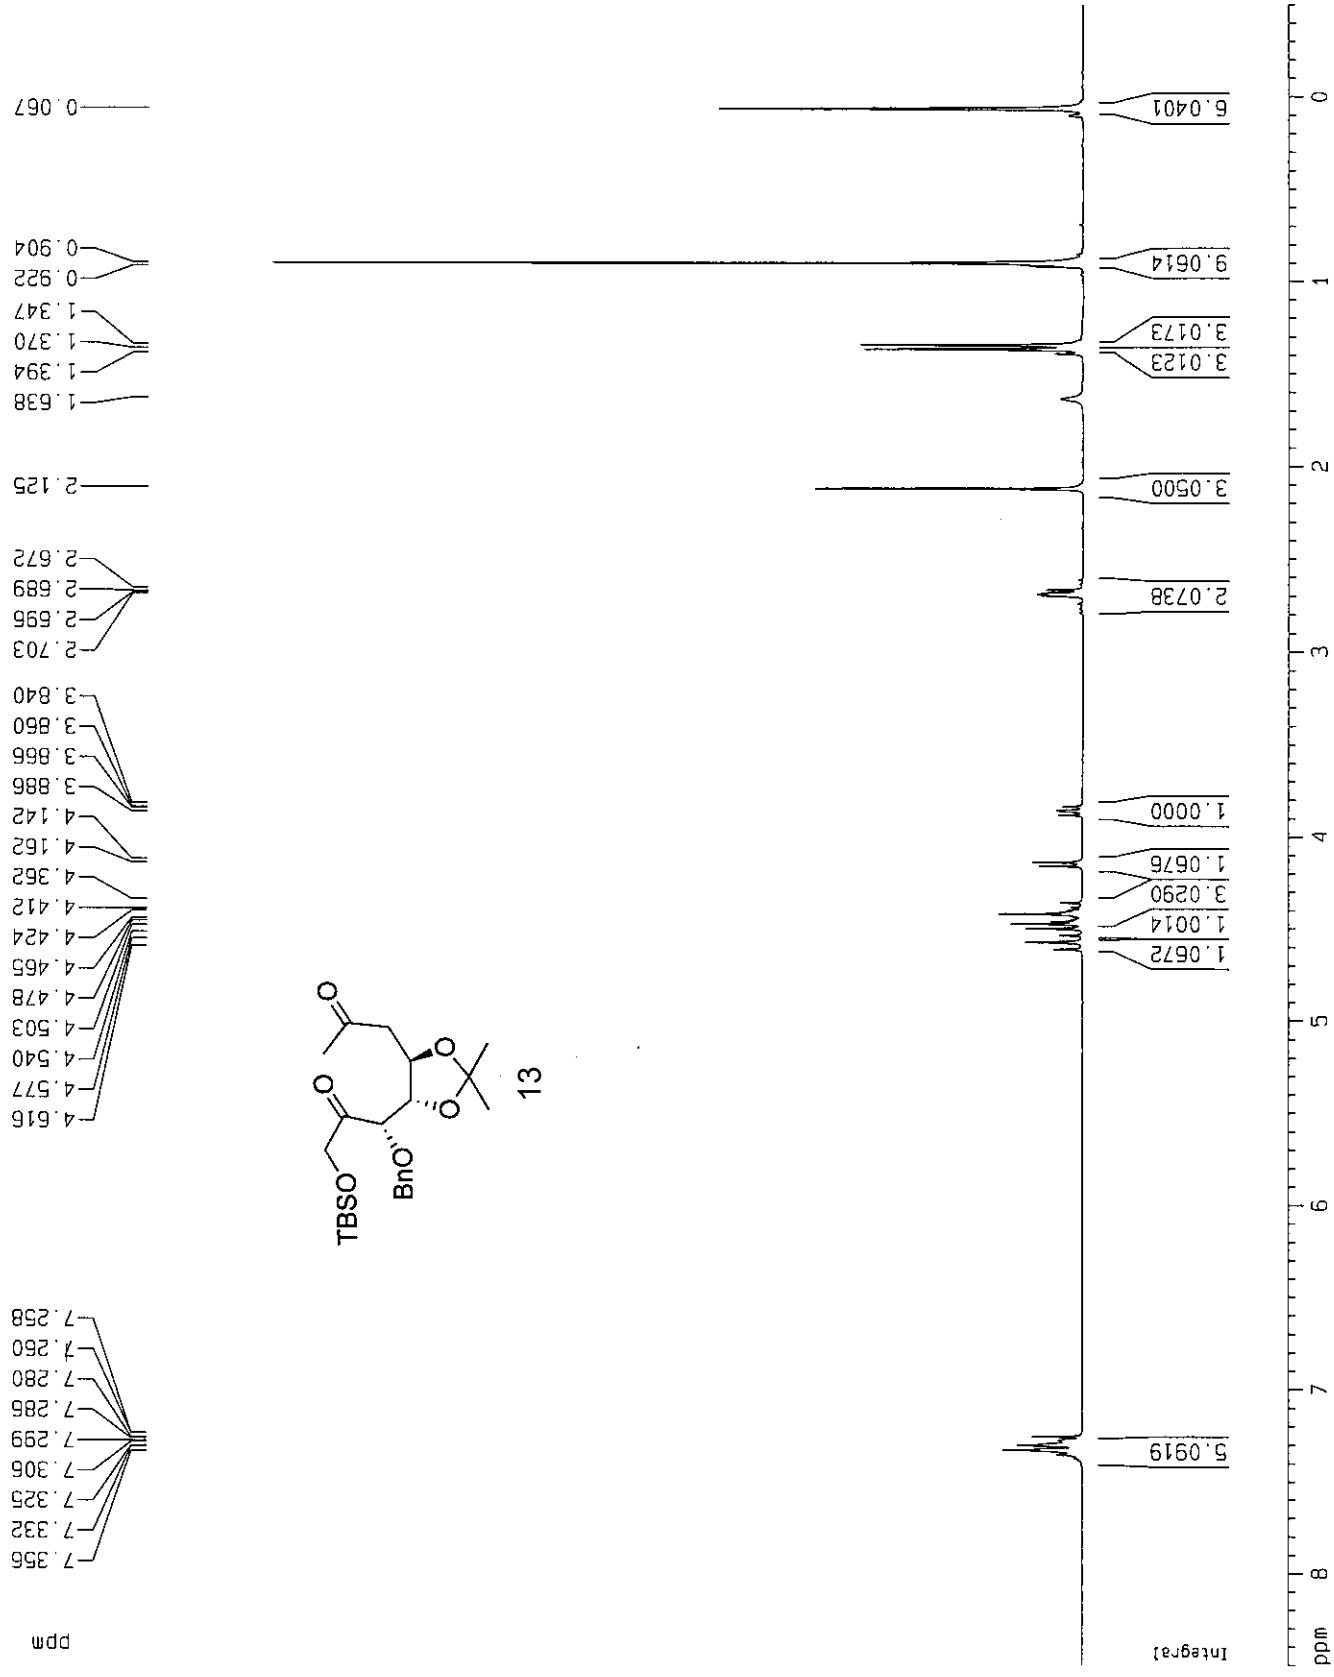

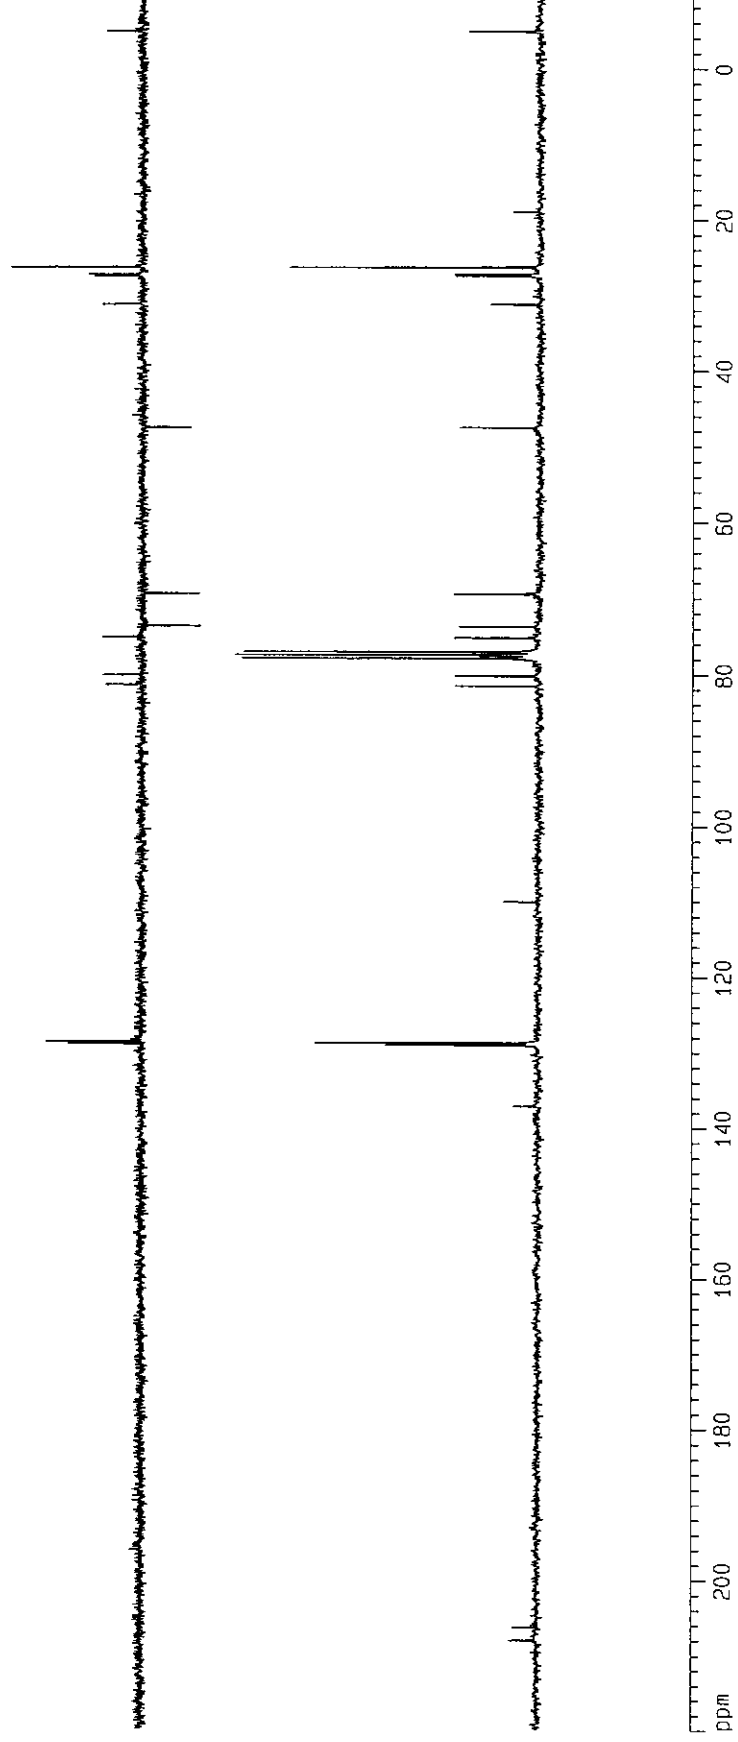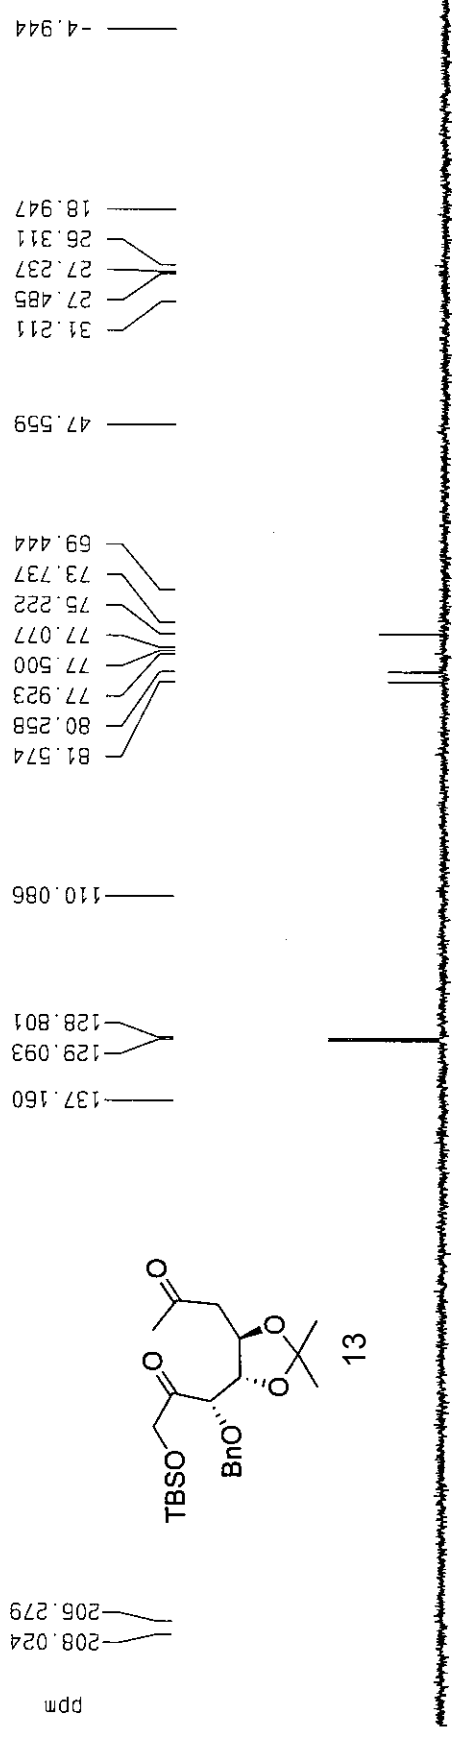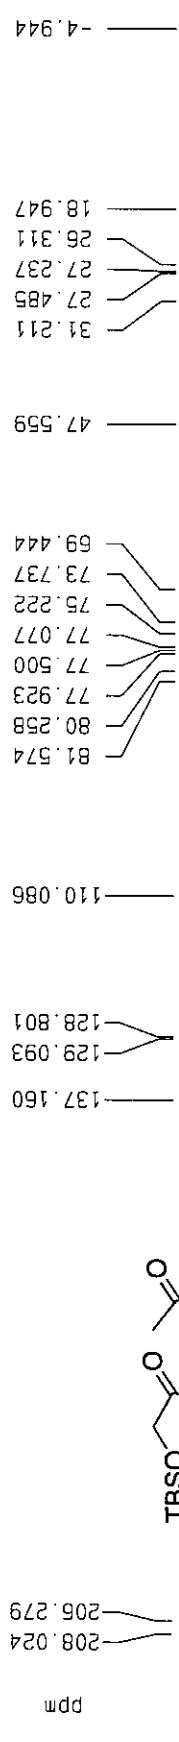

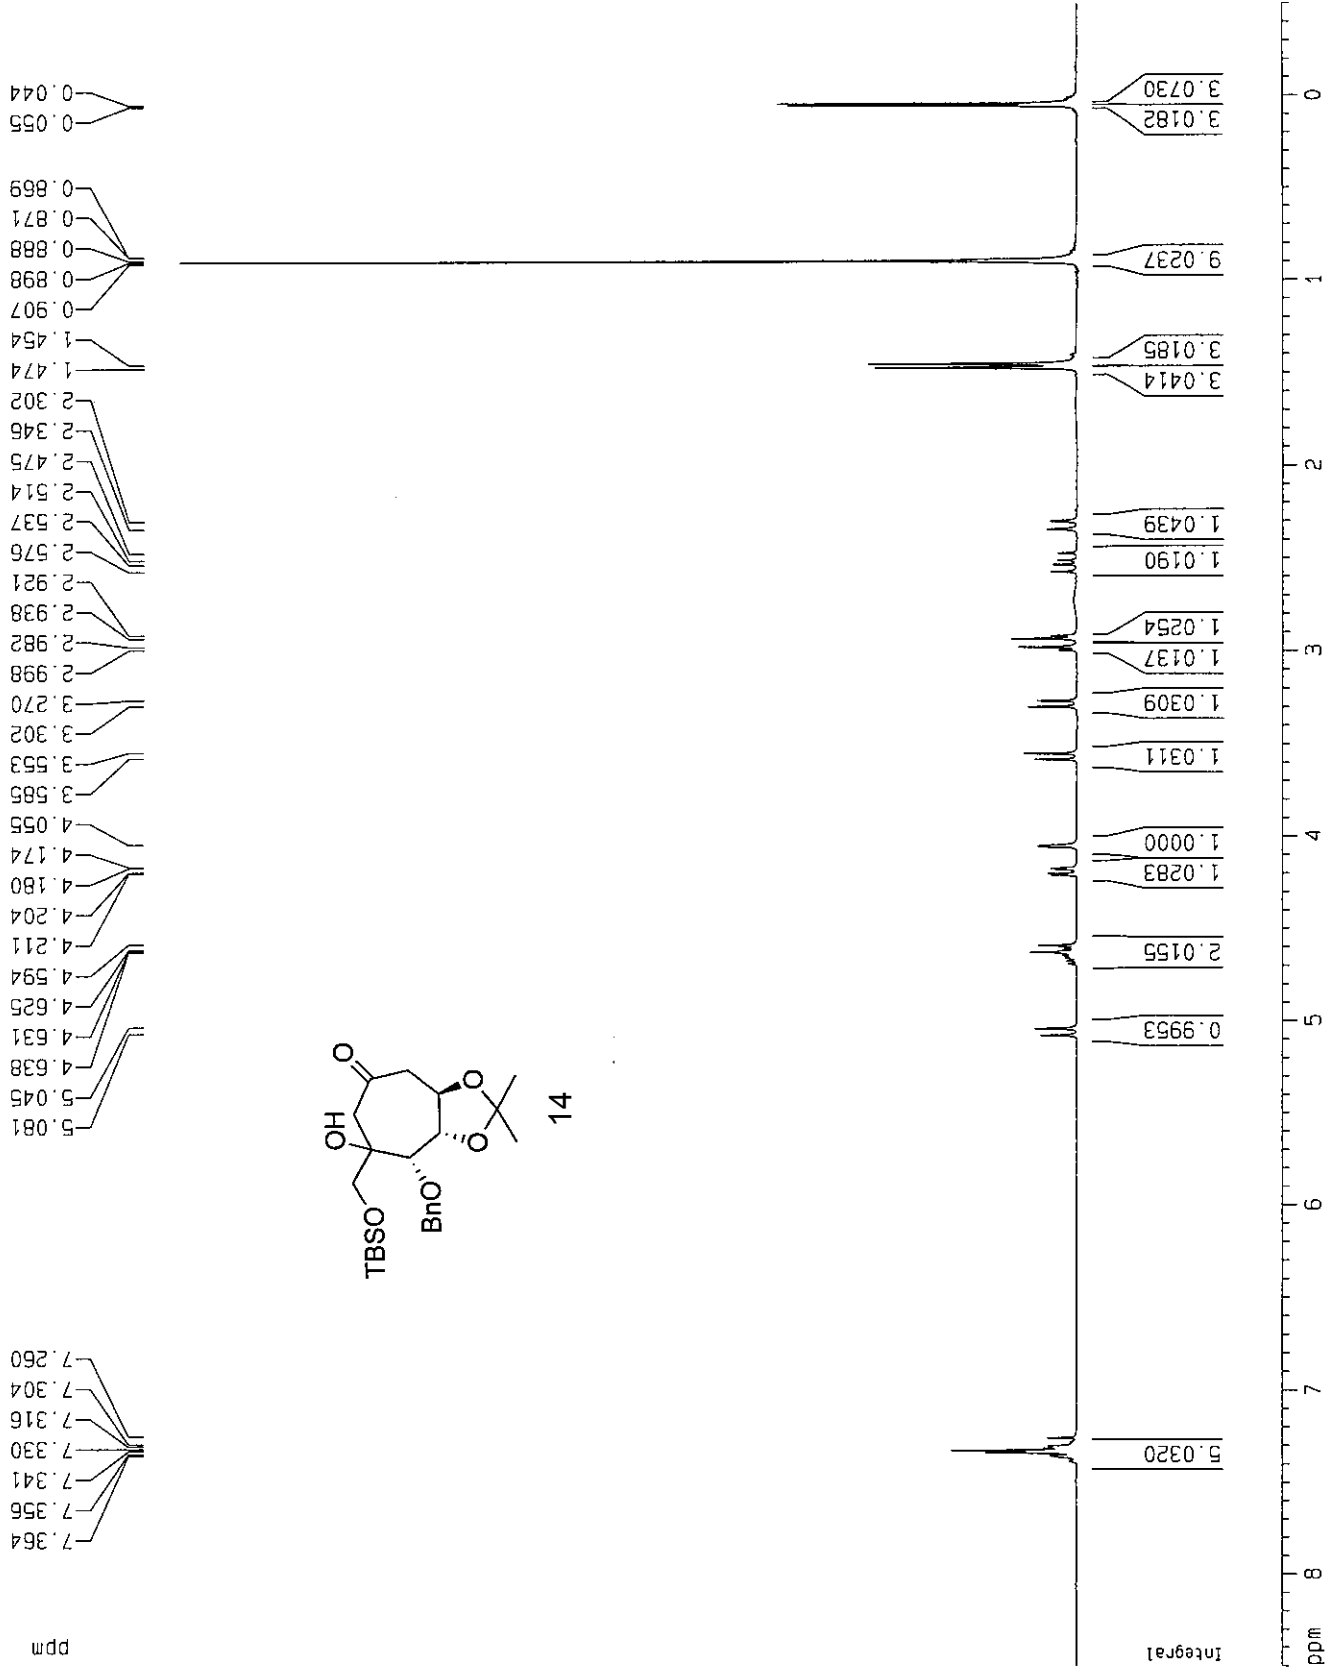

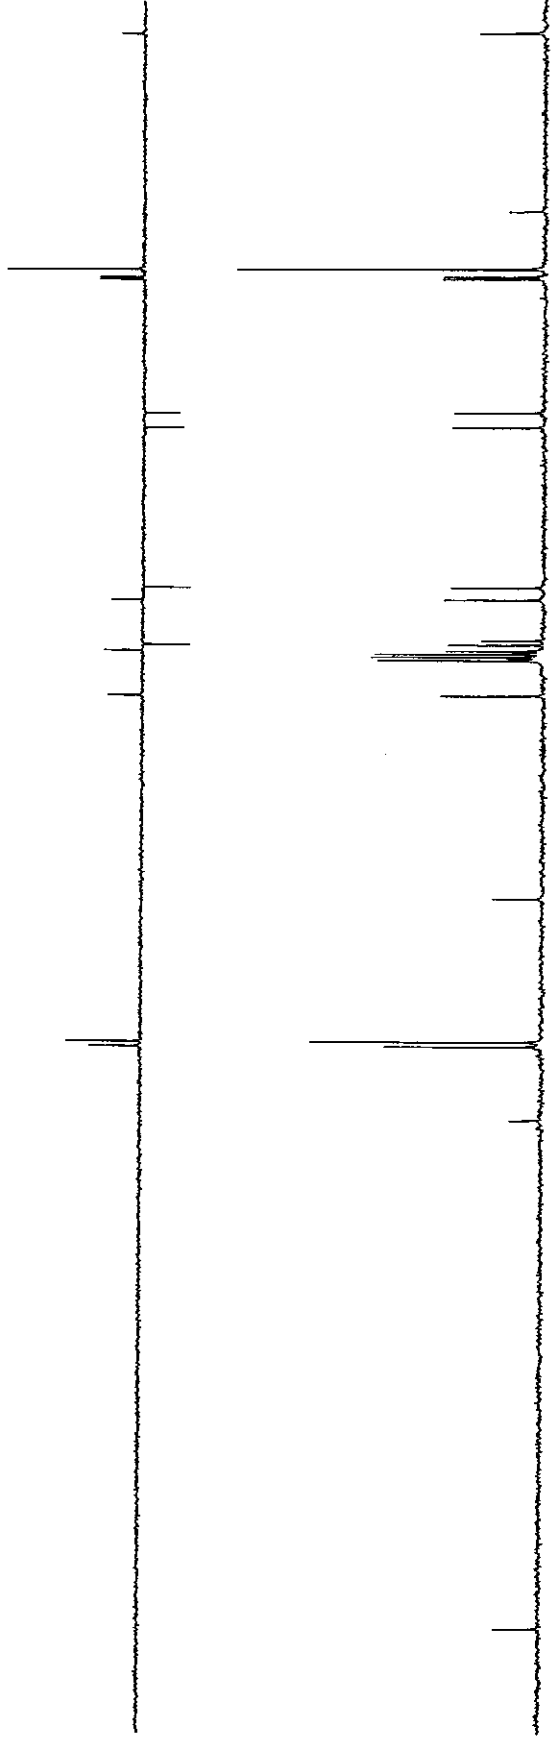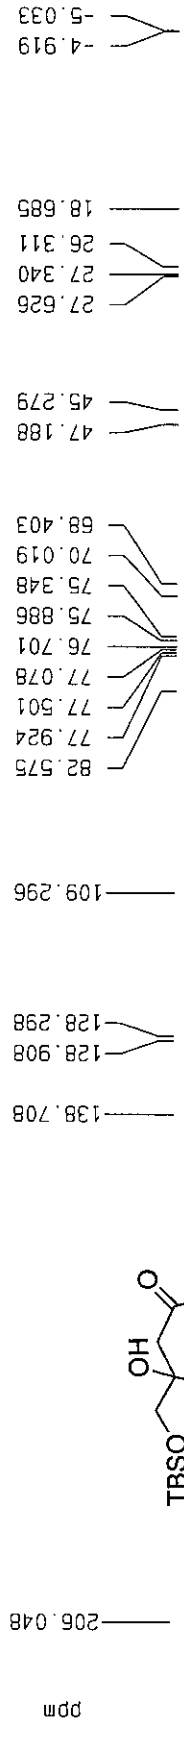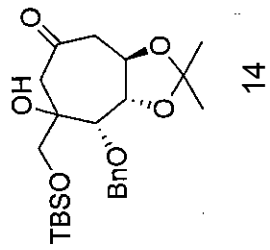

mod  
-206.048



ppm

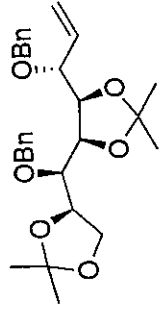

15

26.926  
26.686  
26.228  
25.554

79.013  
78.778  
78.604  
77.921  
77.680  
77.498  
77.075  
73.697  
69.852  
66.022

139.420  
138.145  
136.451  
128.950  
128.803  
128.624  
128.301  
127.628  
127.399  
121.087  
109.843  
108.358

ppm

160

150

140

120

100

80

60

40

20

0

1.471  
1.350

2.216

3.561  
3.569  
3.586  
3.598  
3.866  
3.896  
4.229  
4.265  
4.364  
4.387  
4.424  
4.572  
4.609  
4.722  
4.760

7.231  
7.238  
7.251  
7.259  
7.327  
7.341  
7.349  
7.359  
7.364  
7.370  
7.383  
7.388

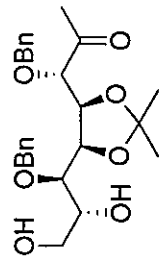

16

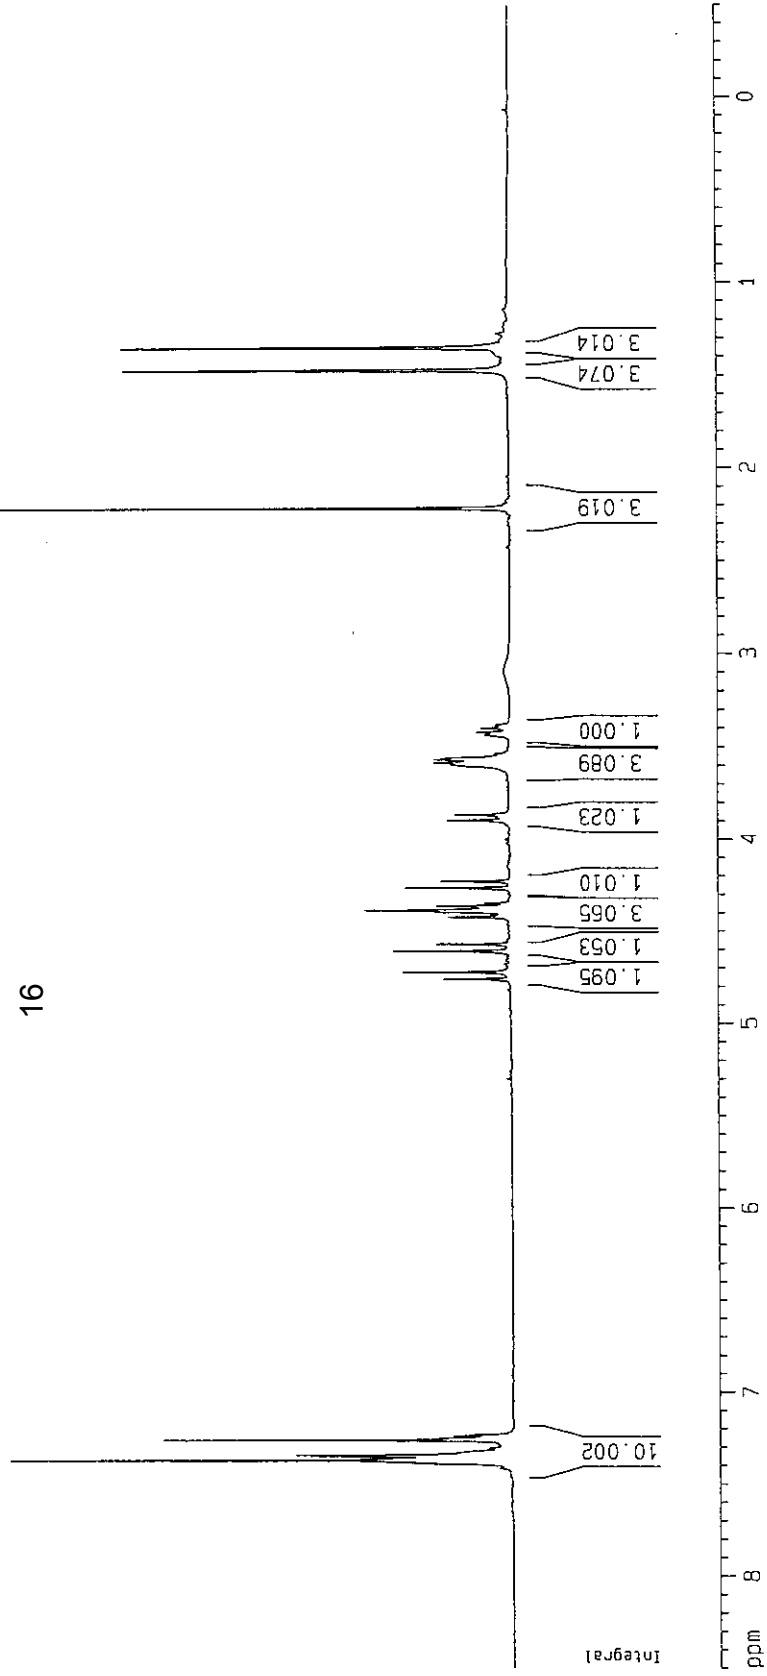



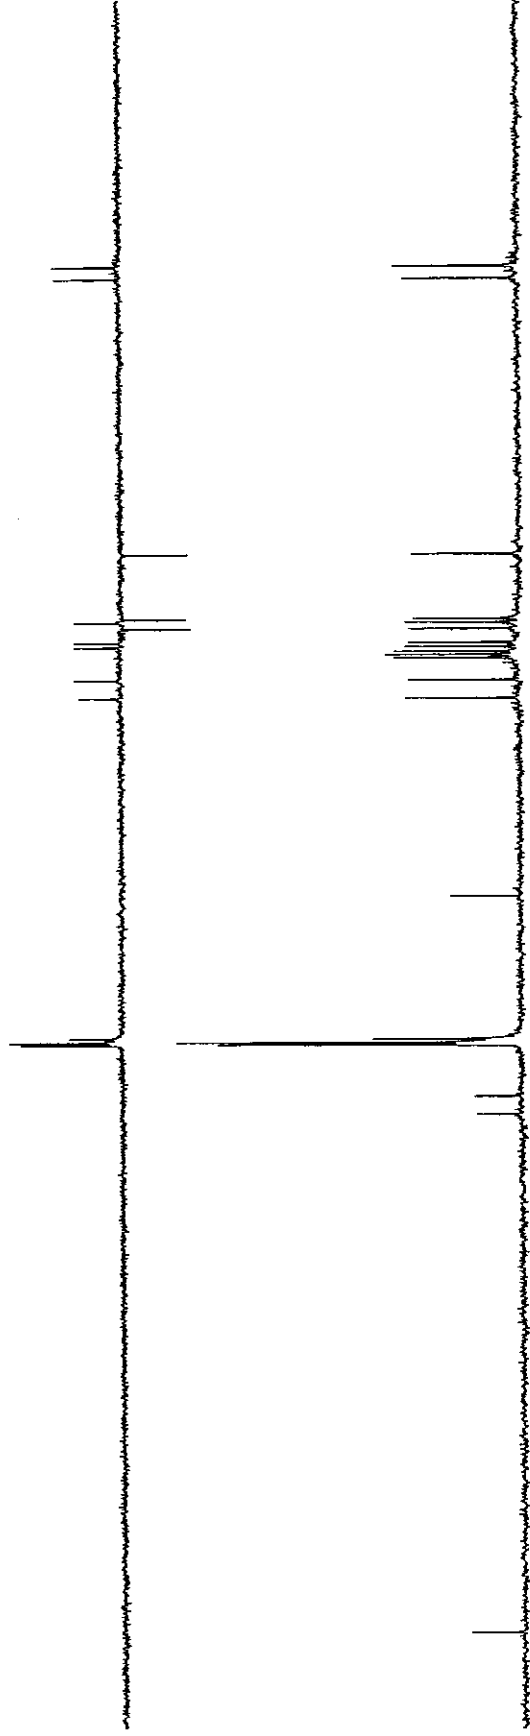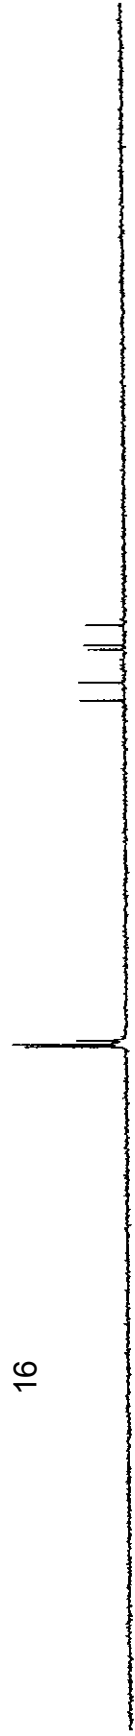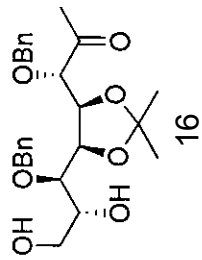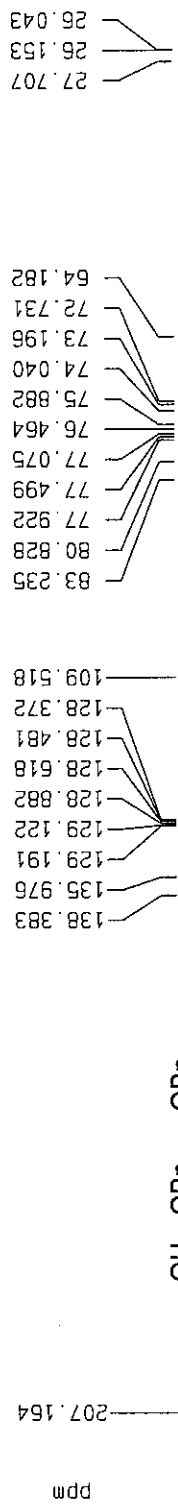

ppw  
-207.164

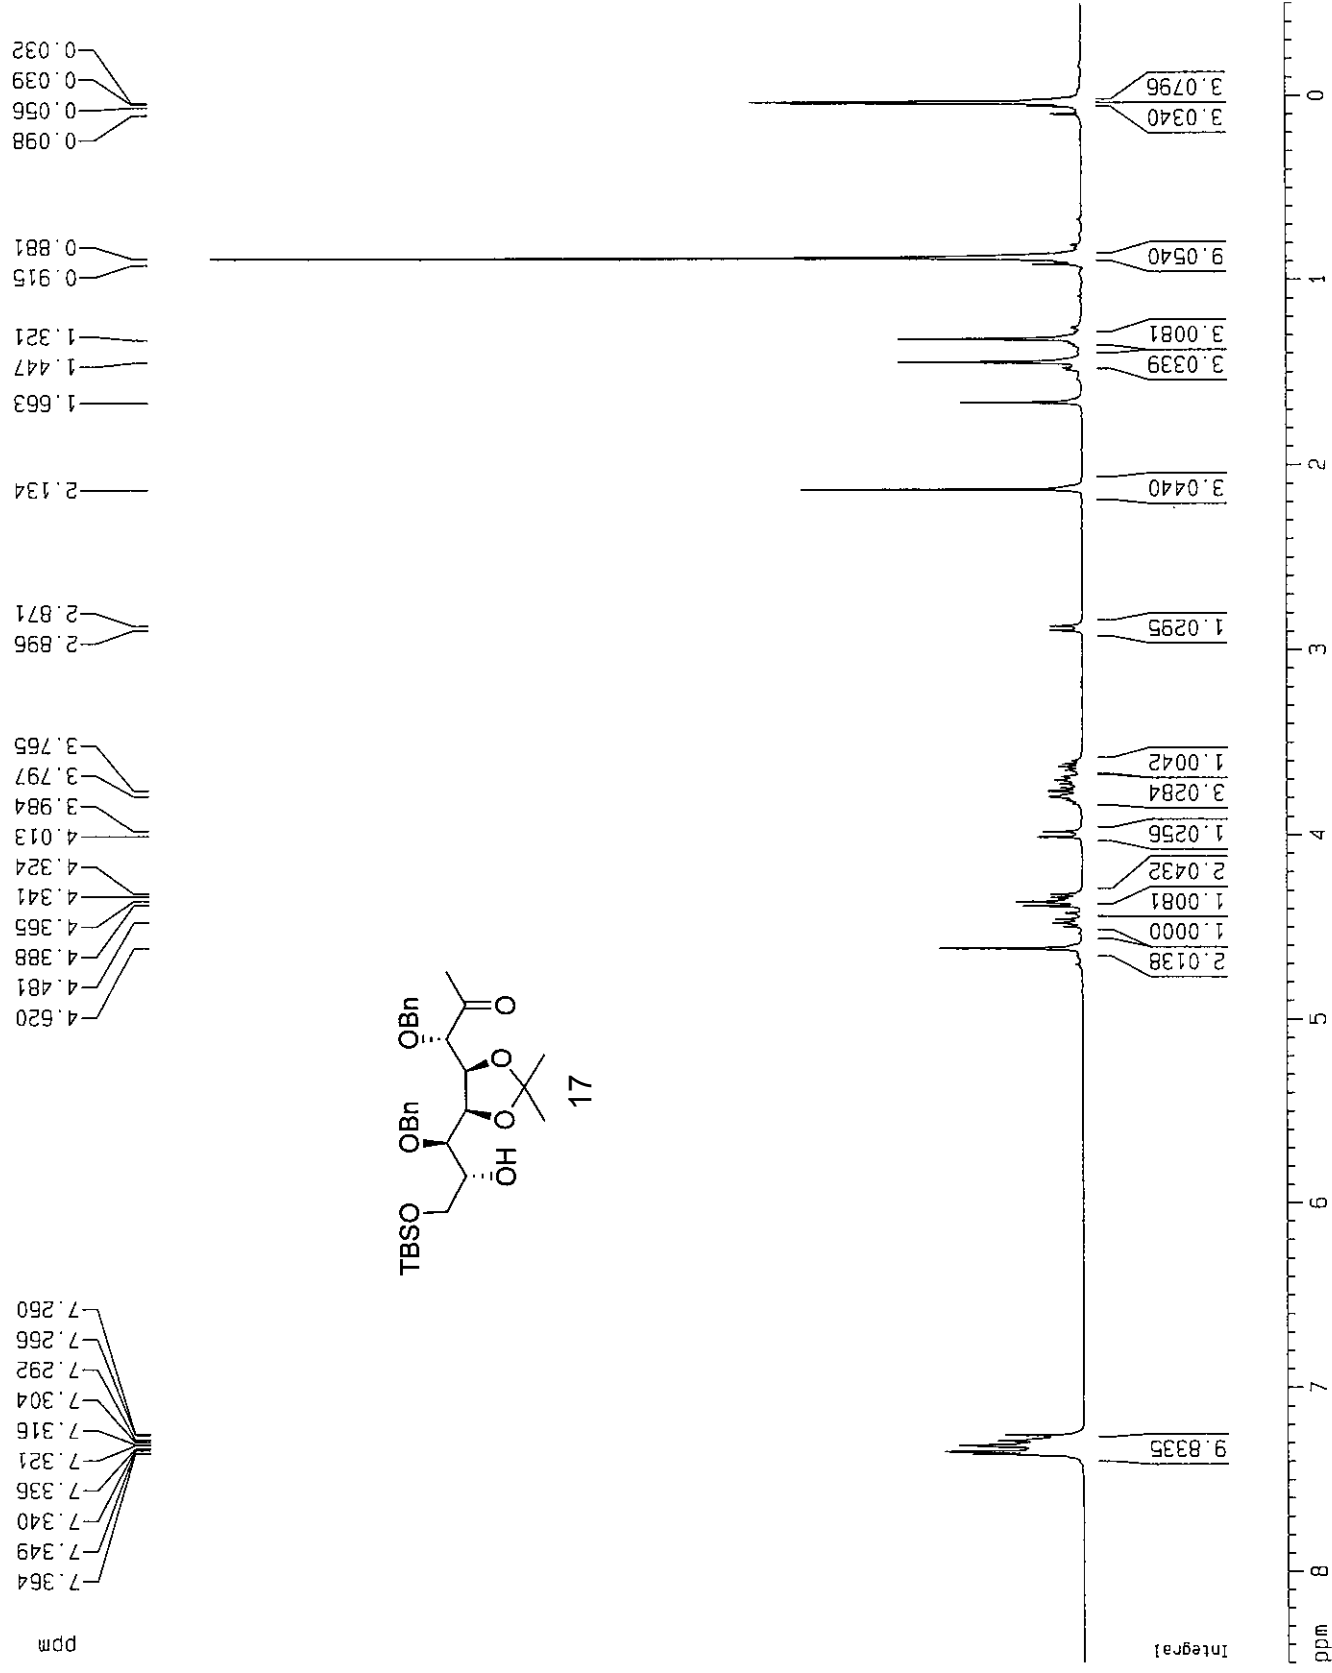

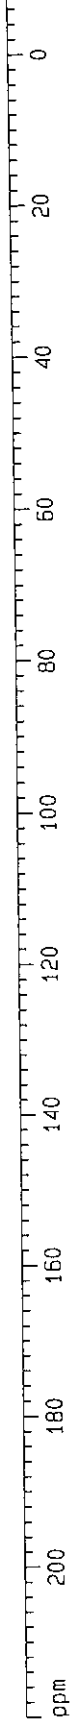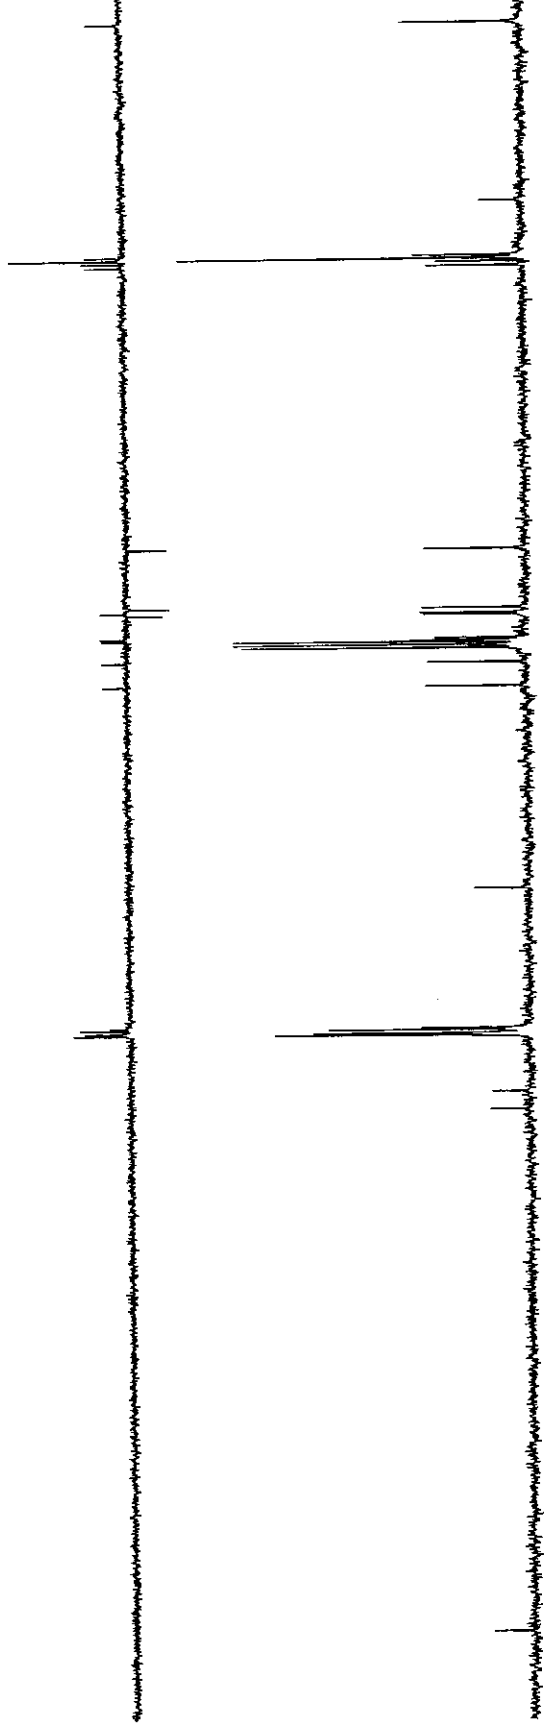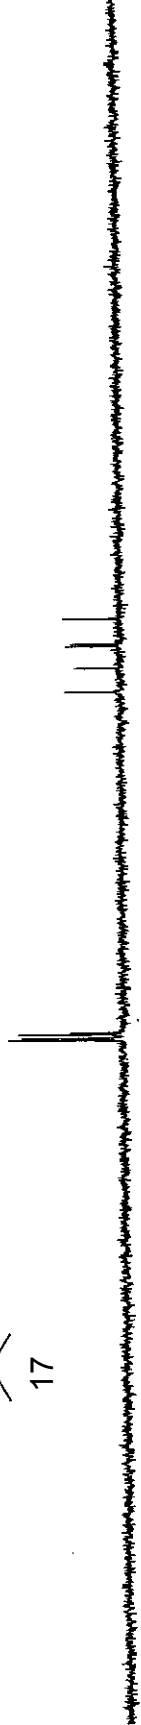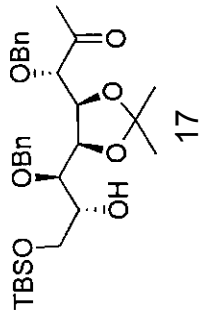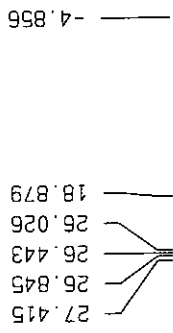

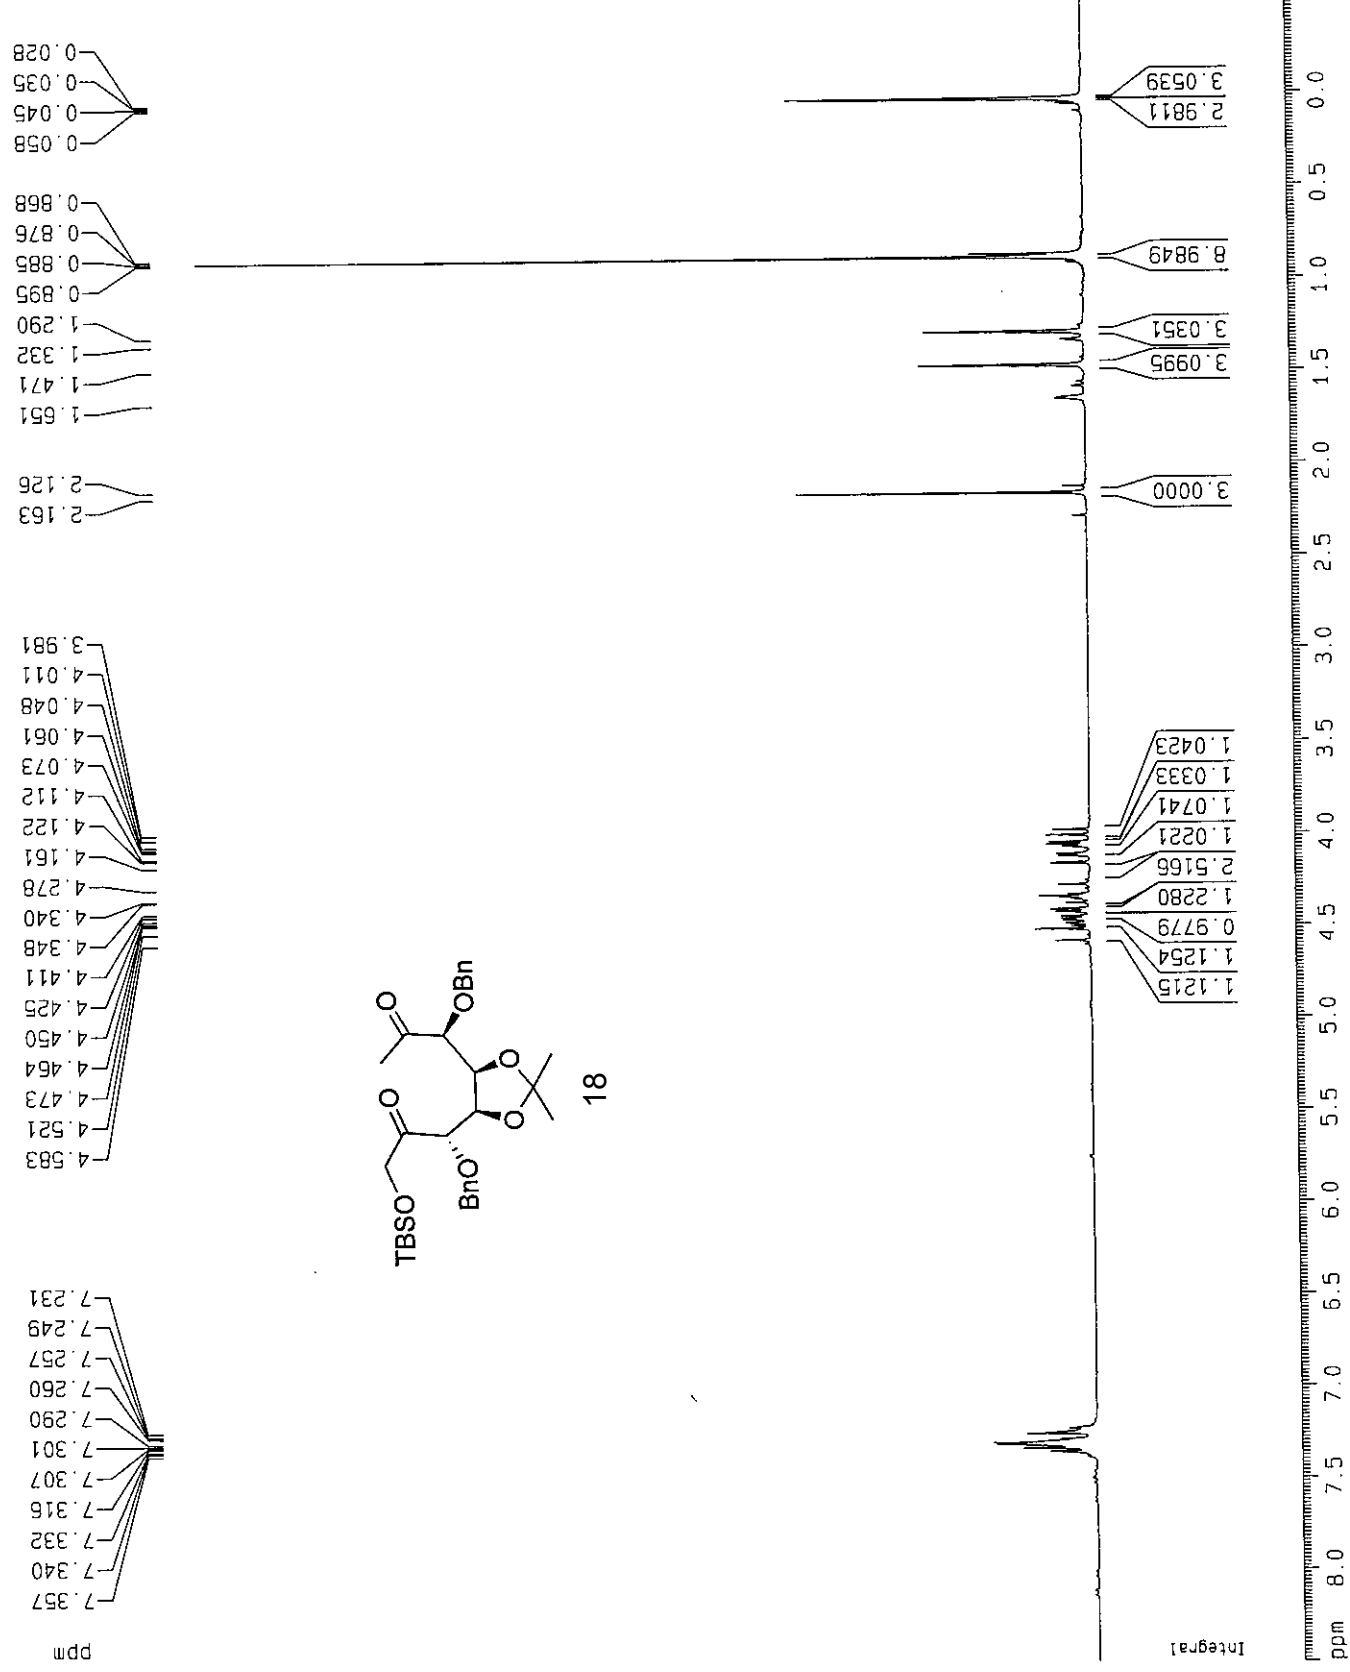

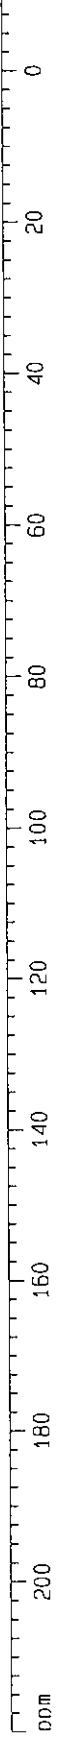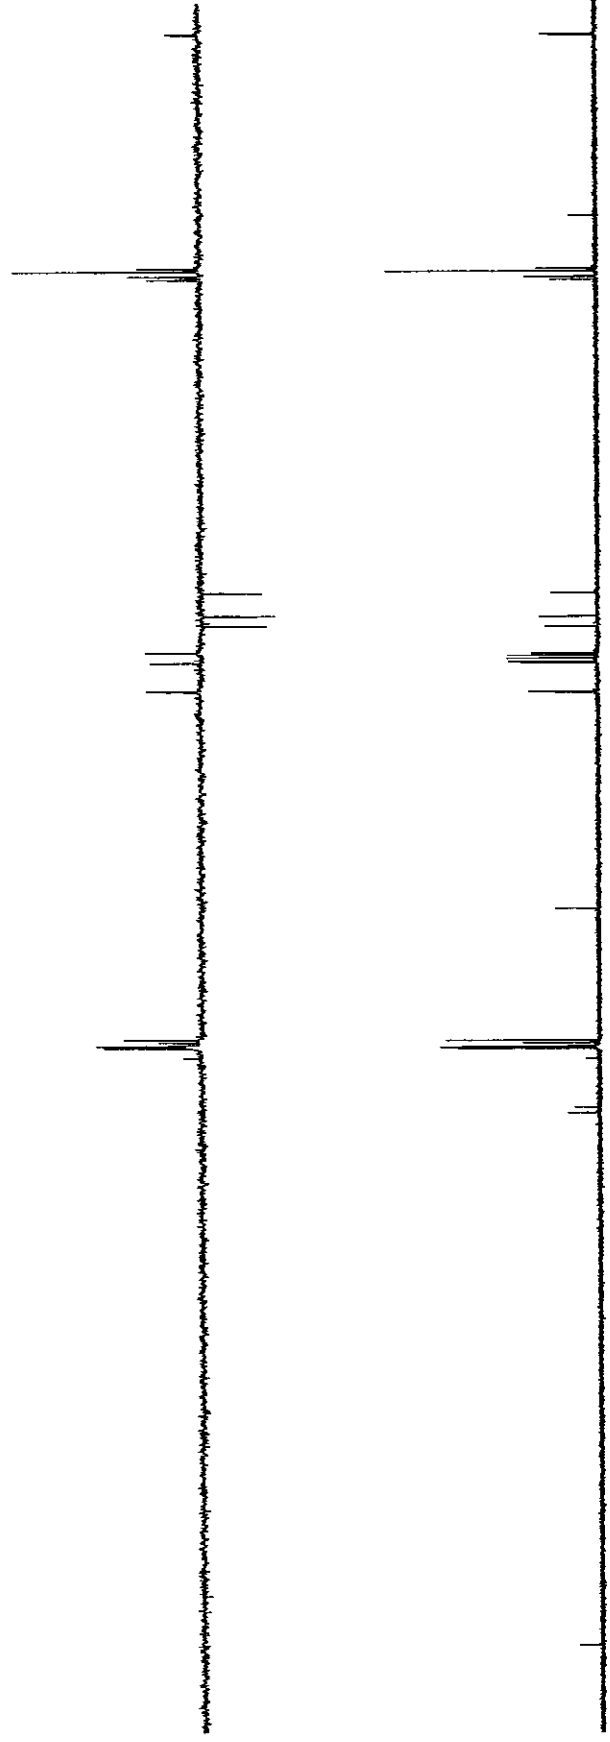

18

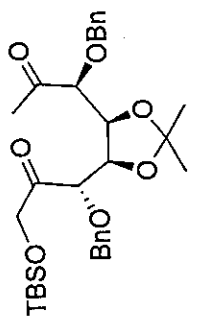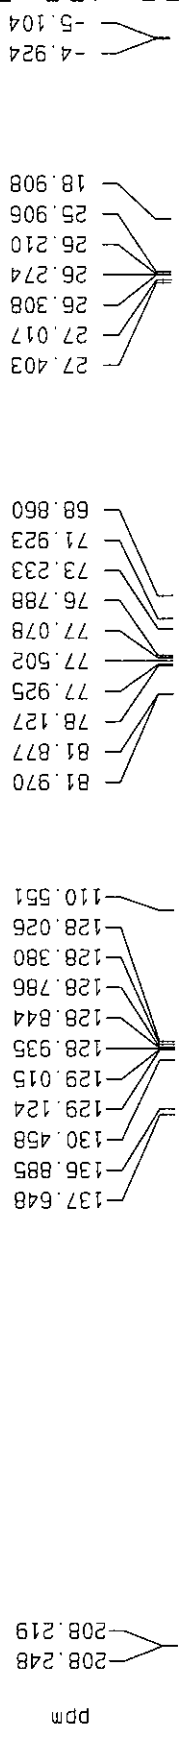





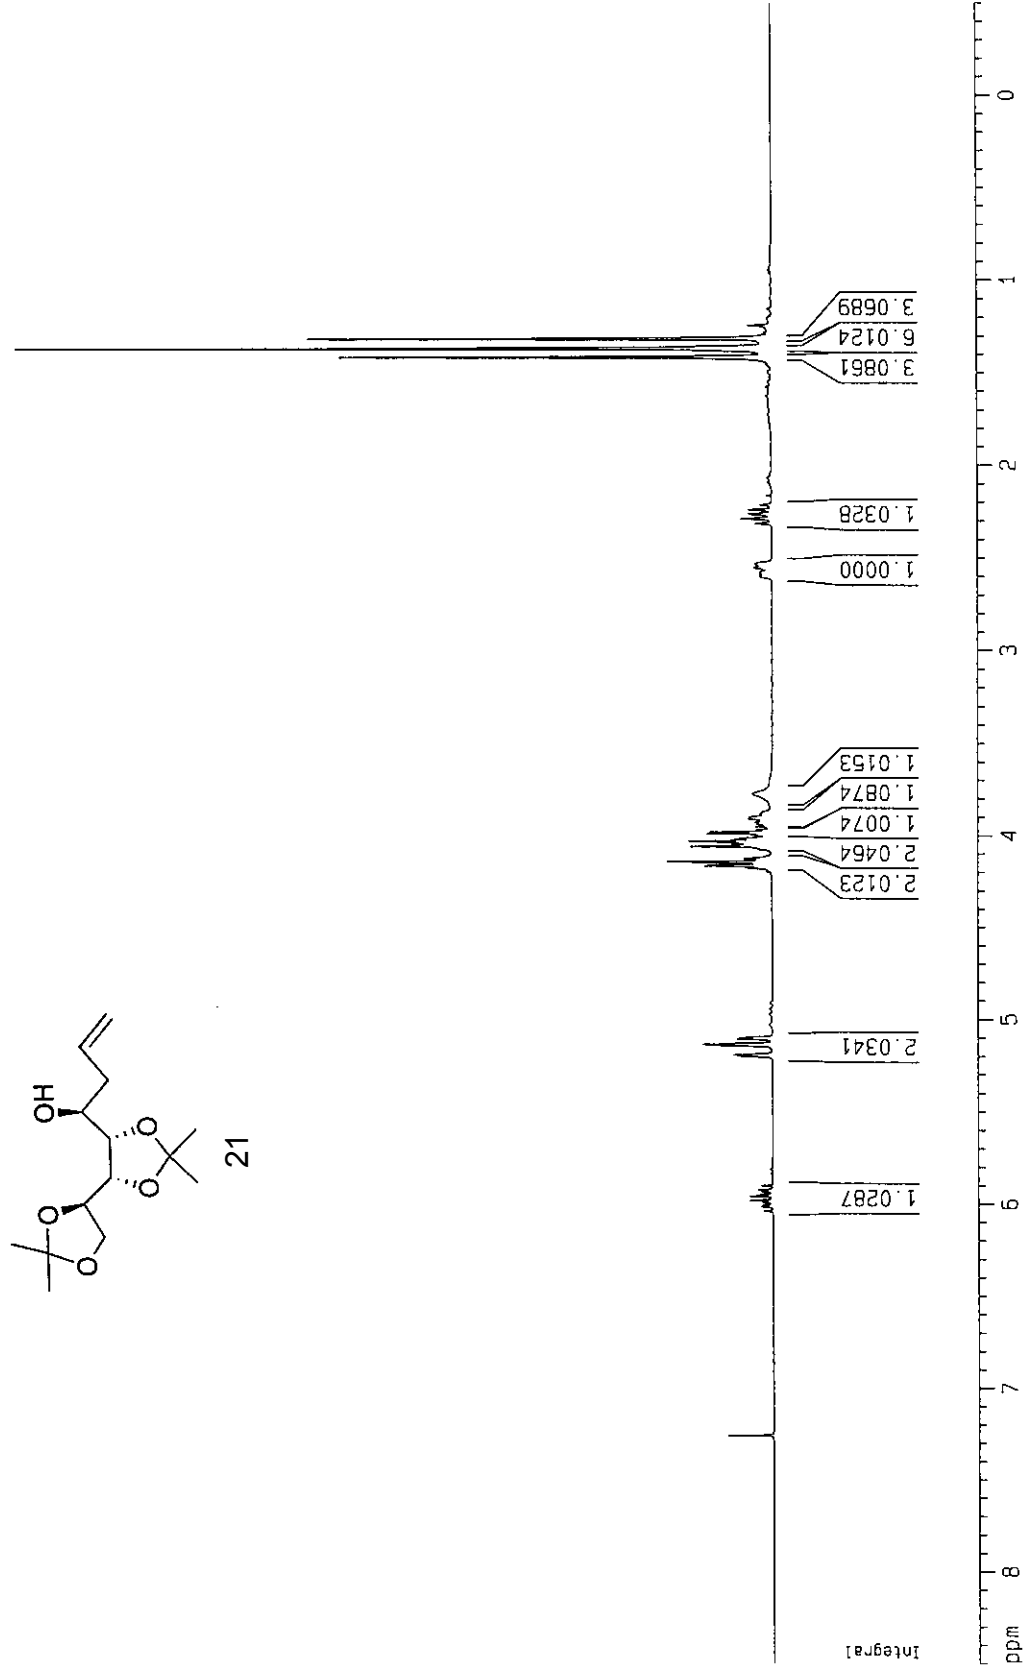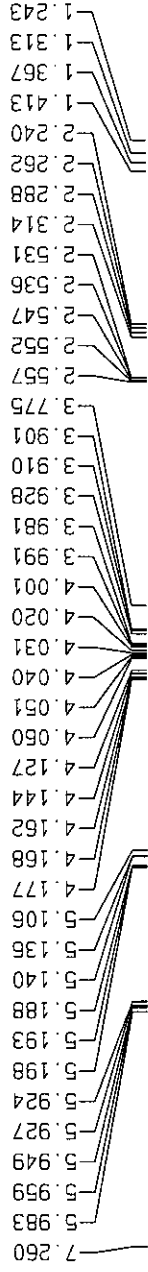

ppm

Integral



80.528  
 79.077  
 77.924  
 77.501  
 77.077  
 73.613  
 68.825  
 68.494  
 38.838  
 28.579  
 27.015  
 25.930  
 25.849

135.184  
 117.713

ppm

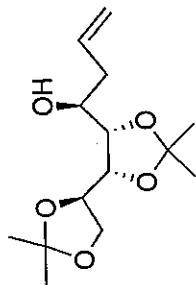

21

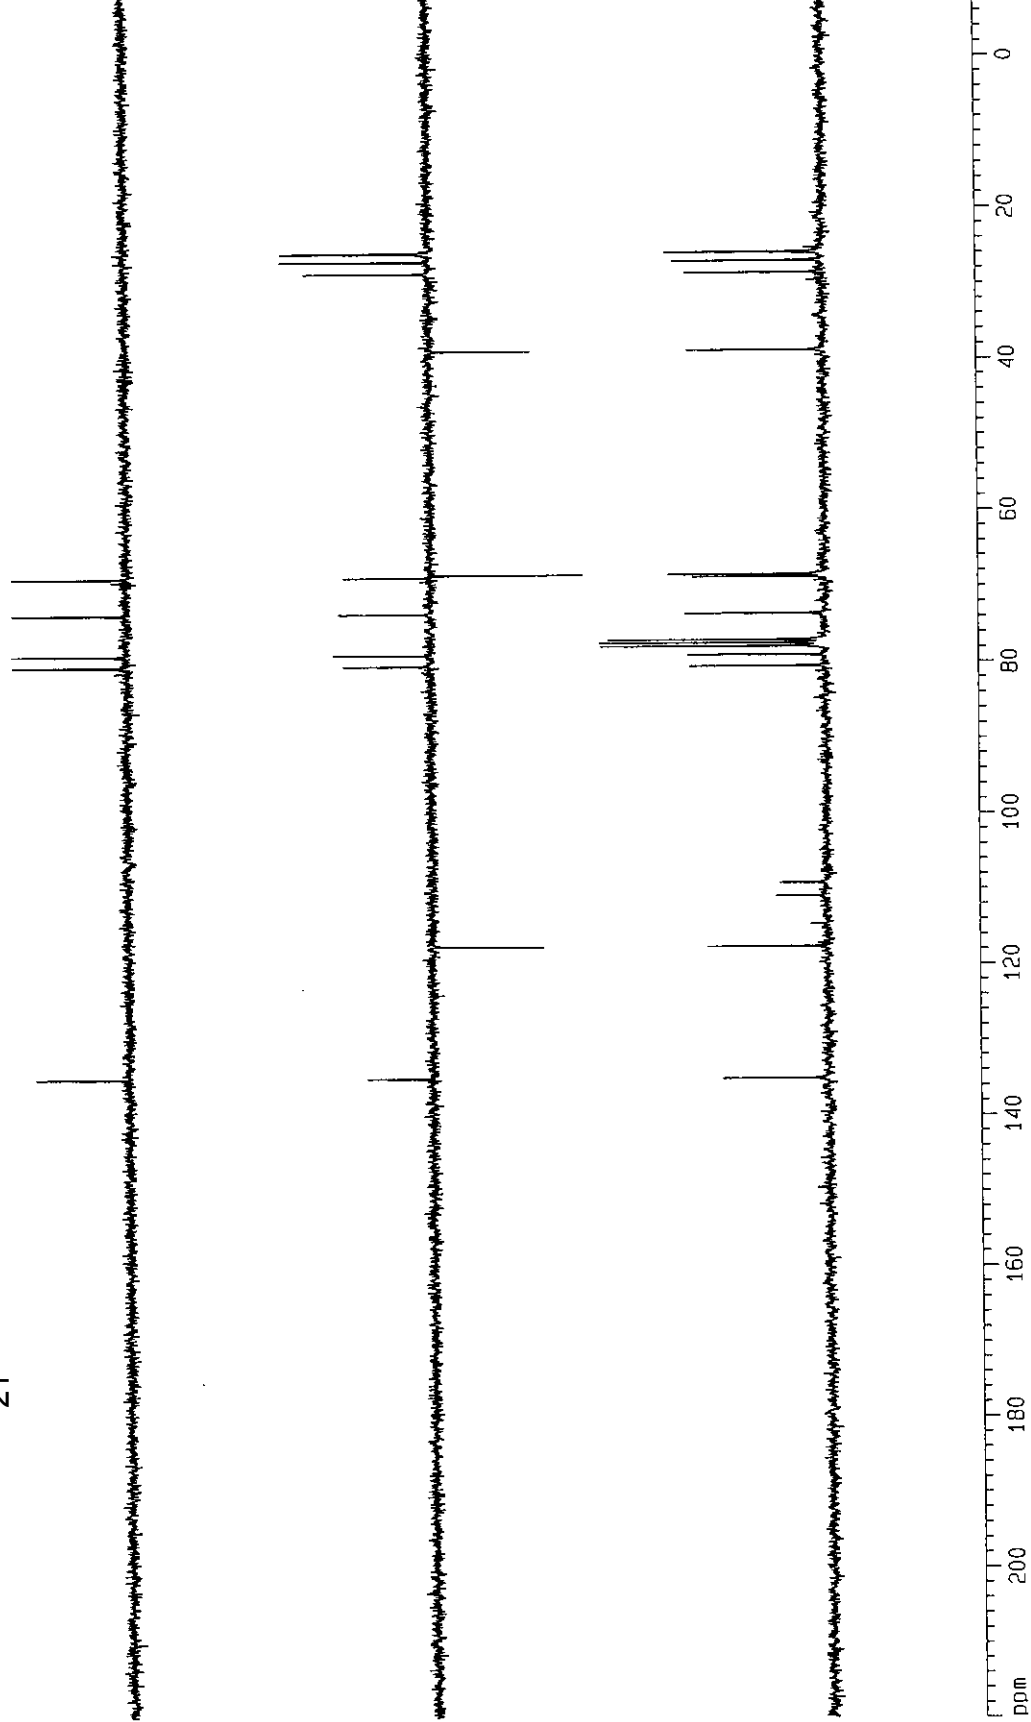

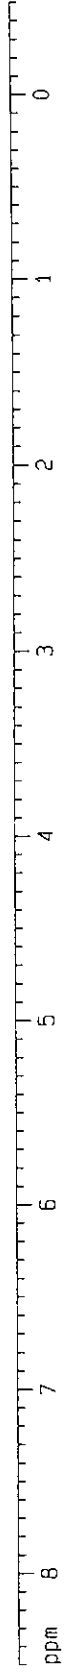

Integral

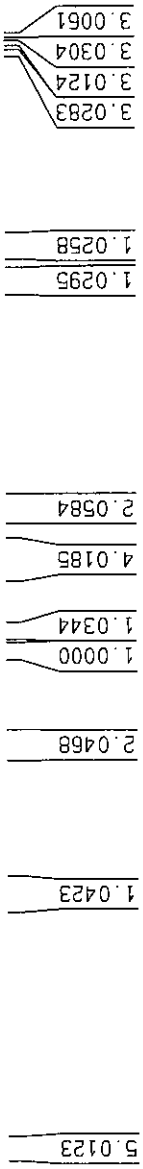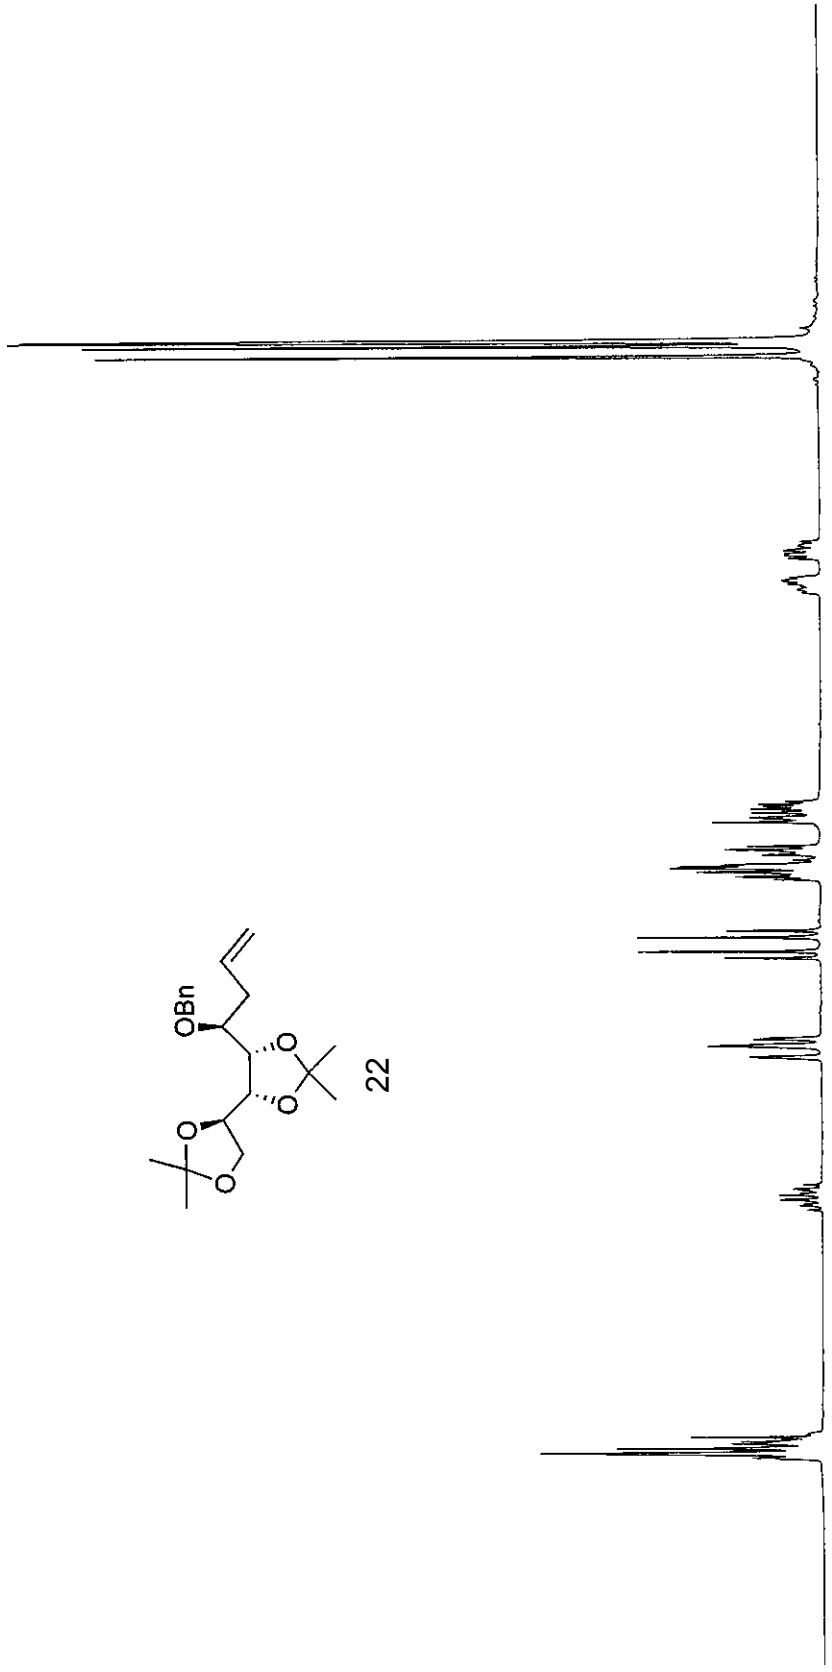

22

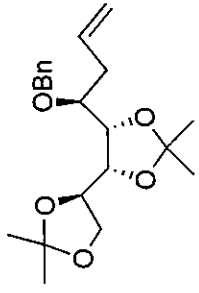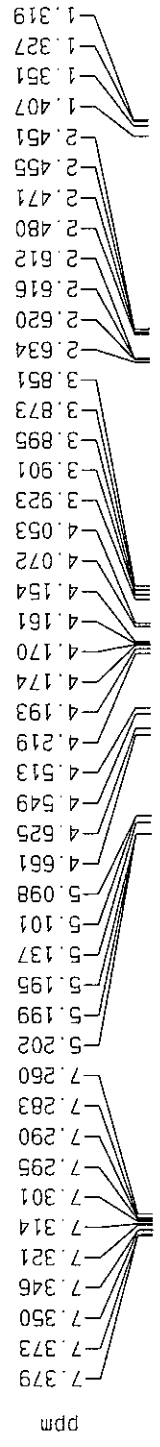

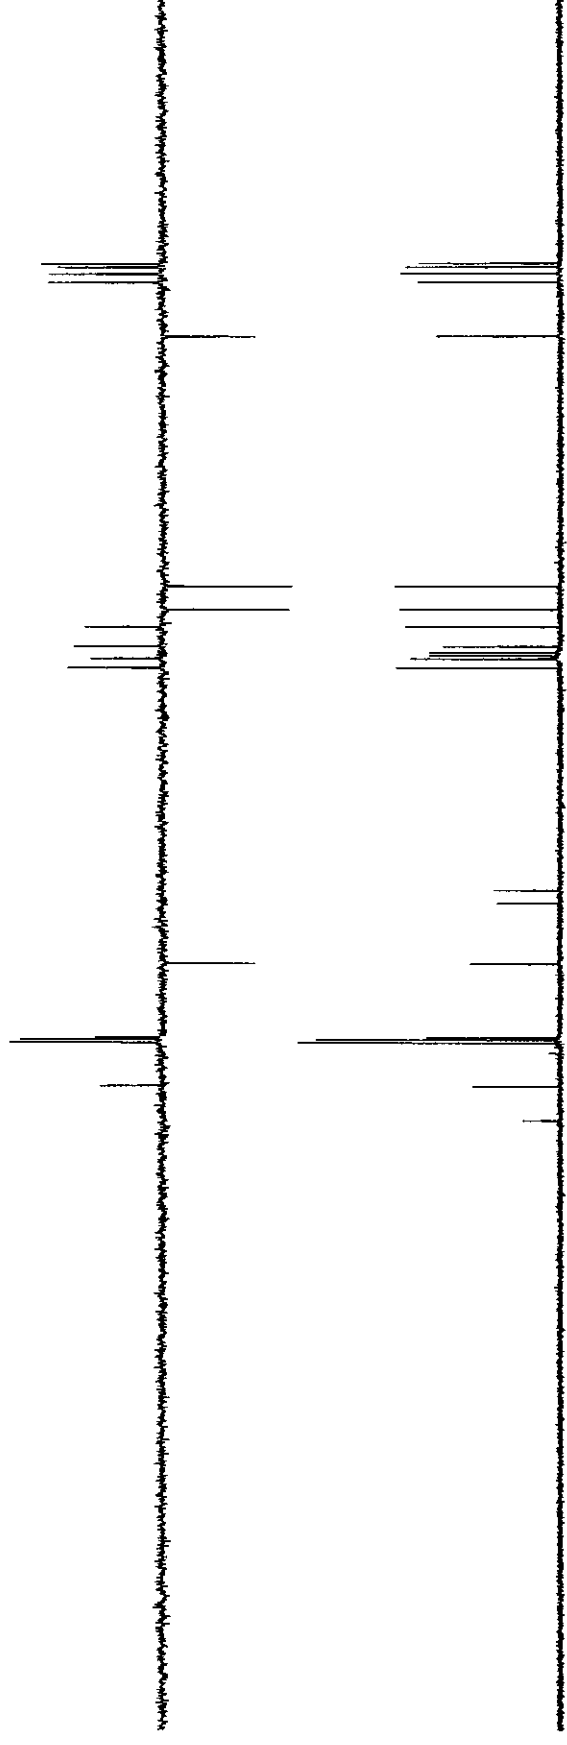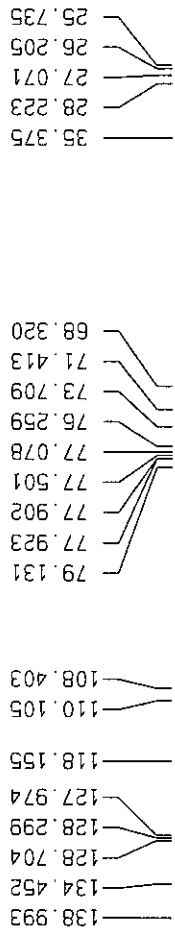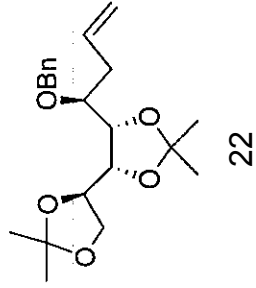

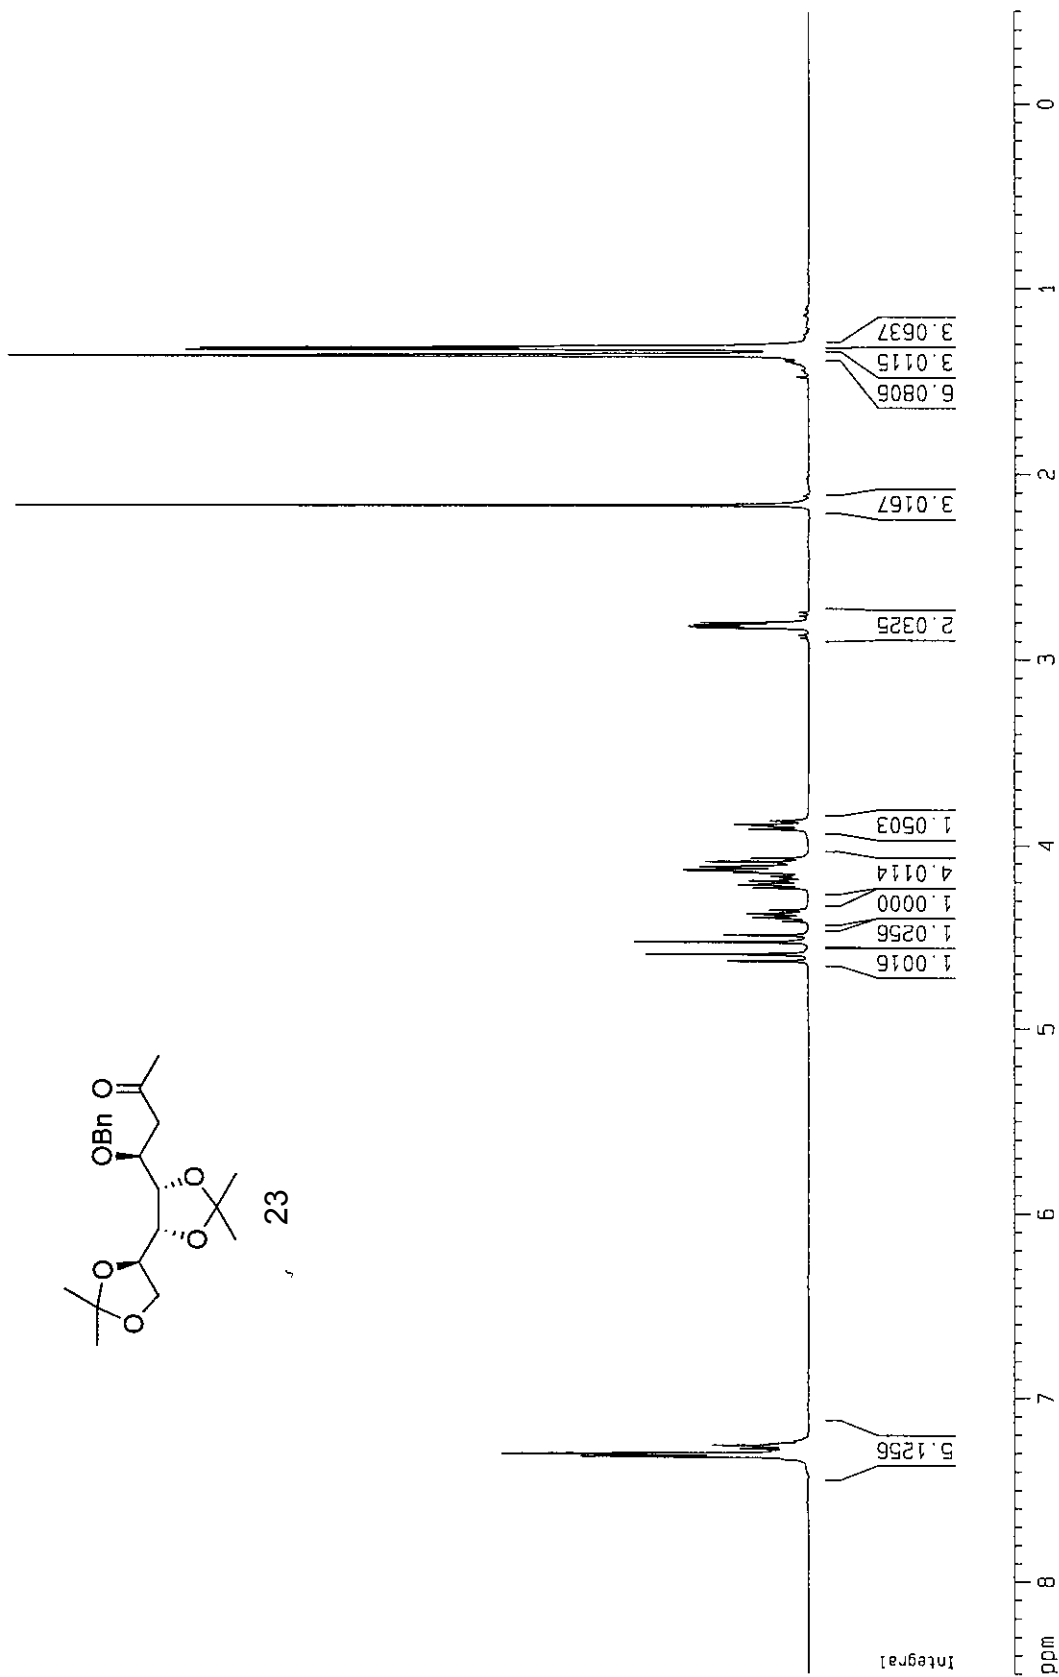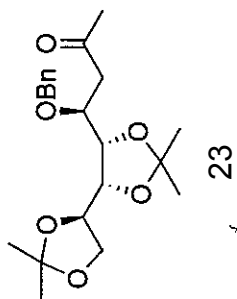

1.358  
1.325  
1.314

2.170  
2.804  
2.815  
2.824  
2.832  
3.890  
3.898  
3.917  
4.073  
4.092  
4.123  
4.137  
4.141  
4.153  
4.196  
4.219  
4.237  
4.375  
4.377  
4.398  
4.494  
4.531  
4.599  
4.636

7.260  
7.265  
7.278  
7.306  
7.321

ppm

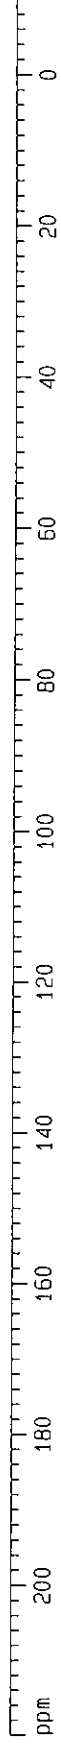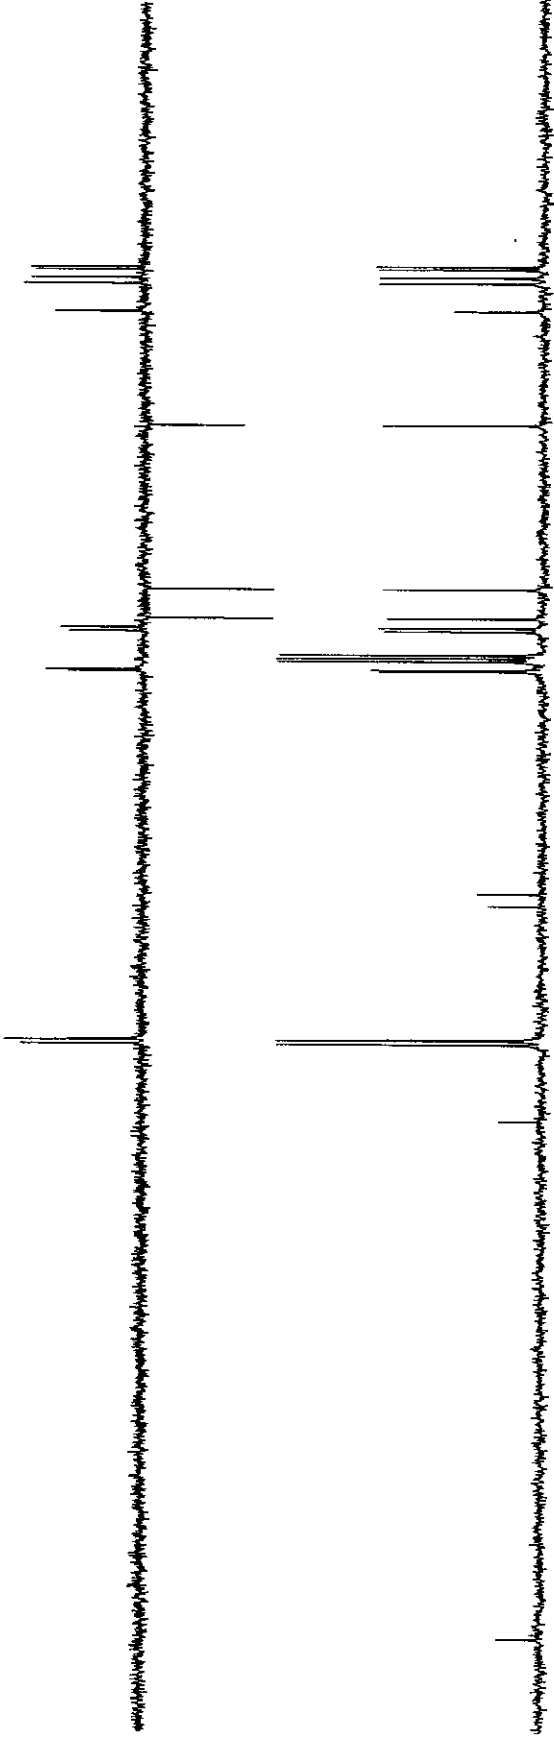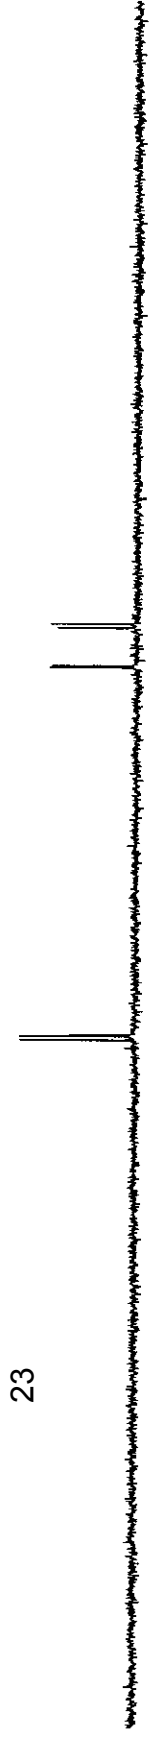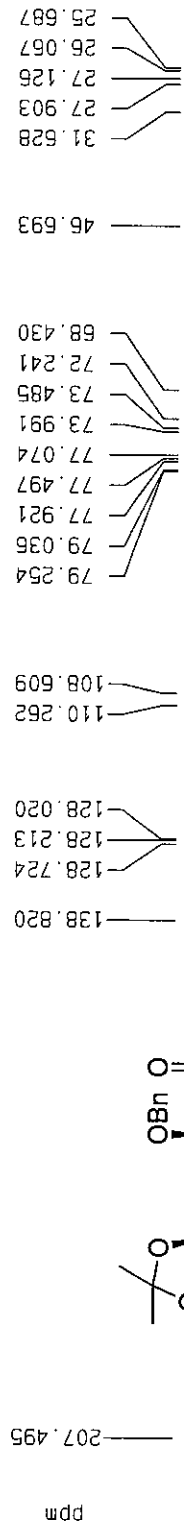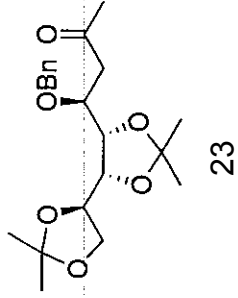

ppm

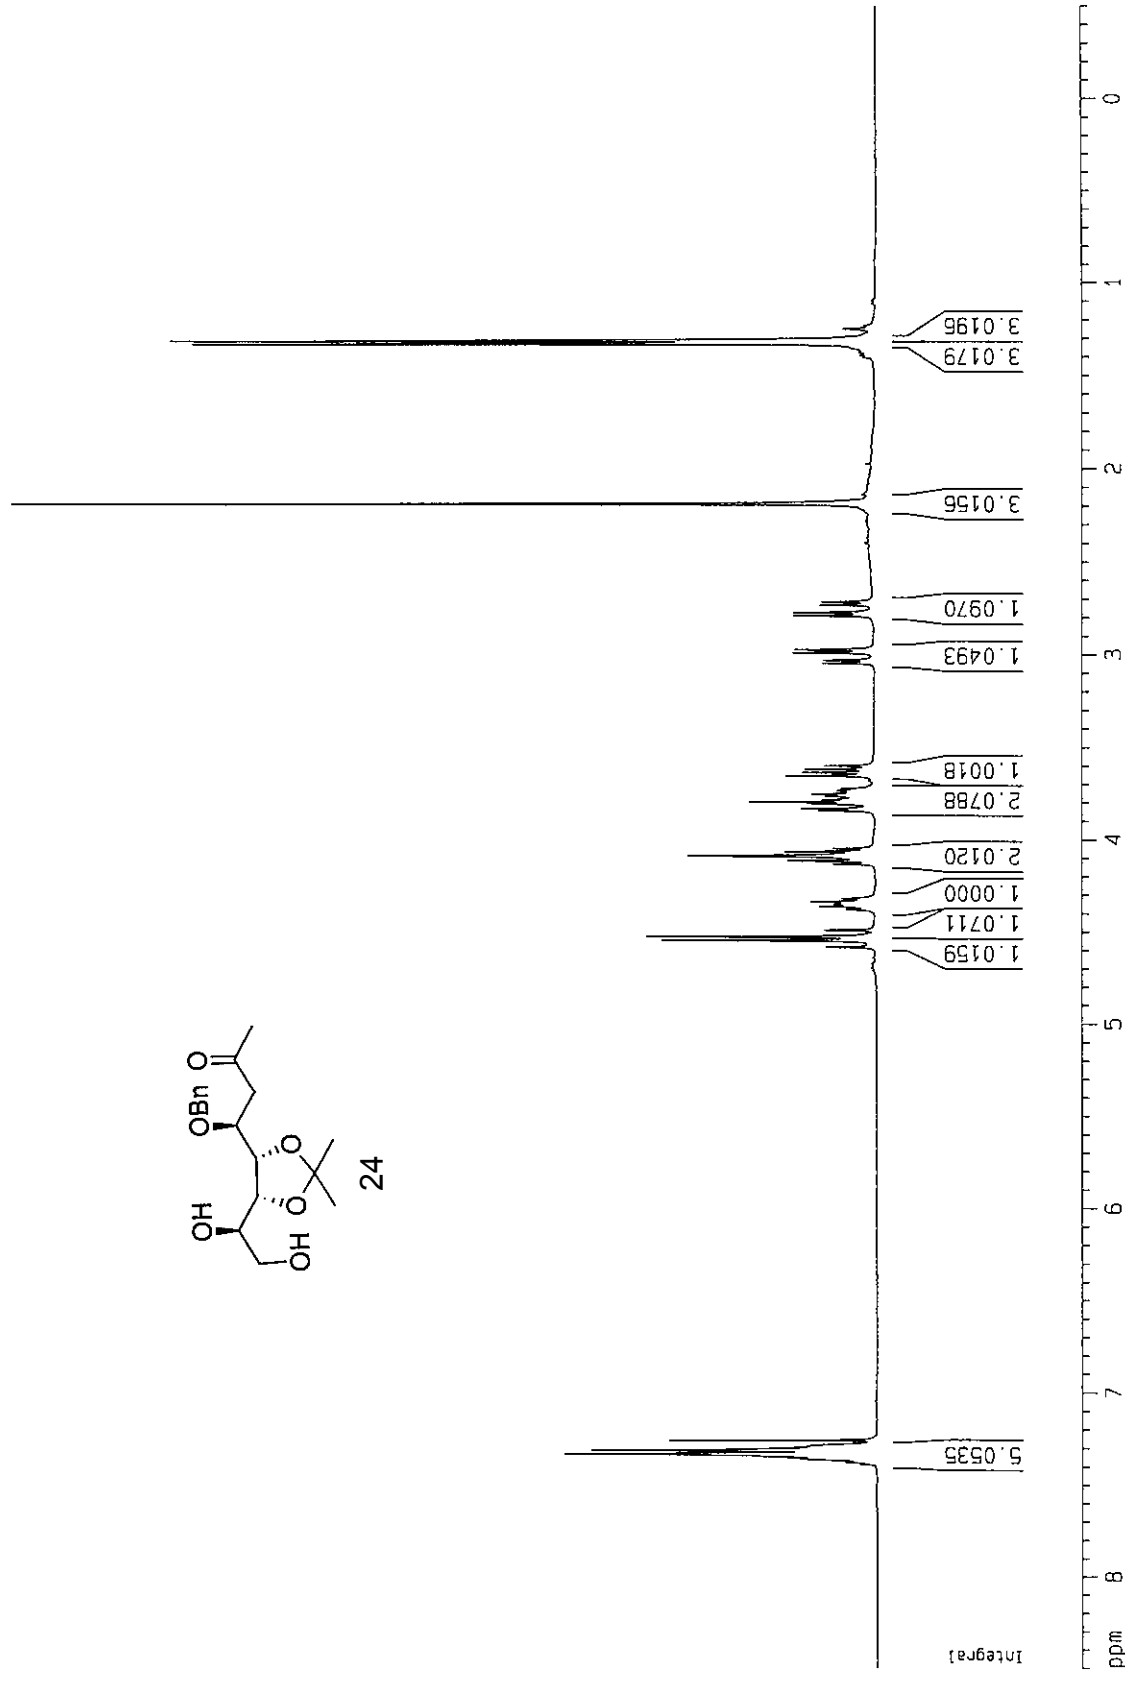

7.360  
7.355  
7.334  
7.315  
7.298  
7.292  
7.288  
7.260

4.93  
4.846  
4.835  
4.810  
3.799  
3.787  
3.757  
3.657  
3.639  
3.621  
3.603  
3.048  
3.032  
2.991  
2.975  
2.791  
2.774  
2.734  
2.717  
2.189  
1.326  
1.309

ppm

Integral

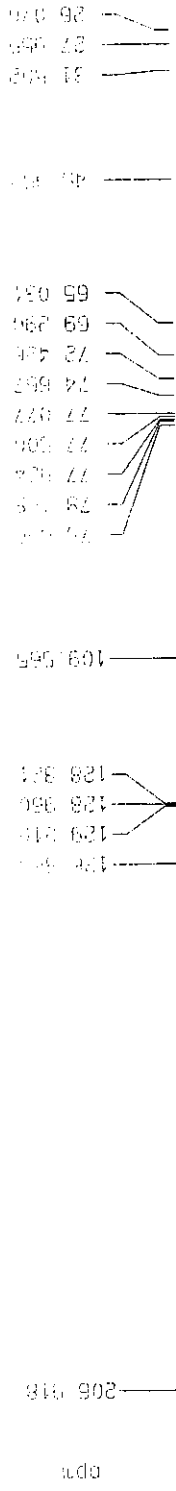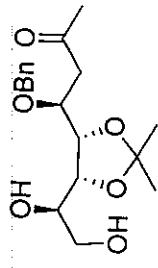

24

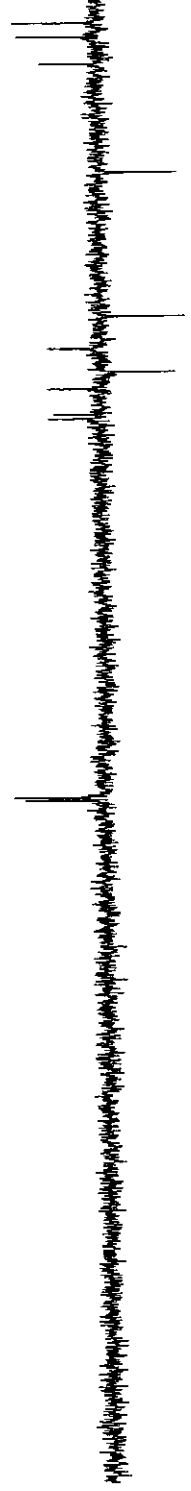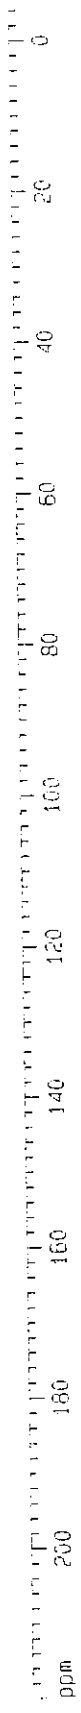

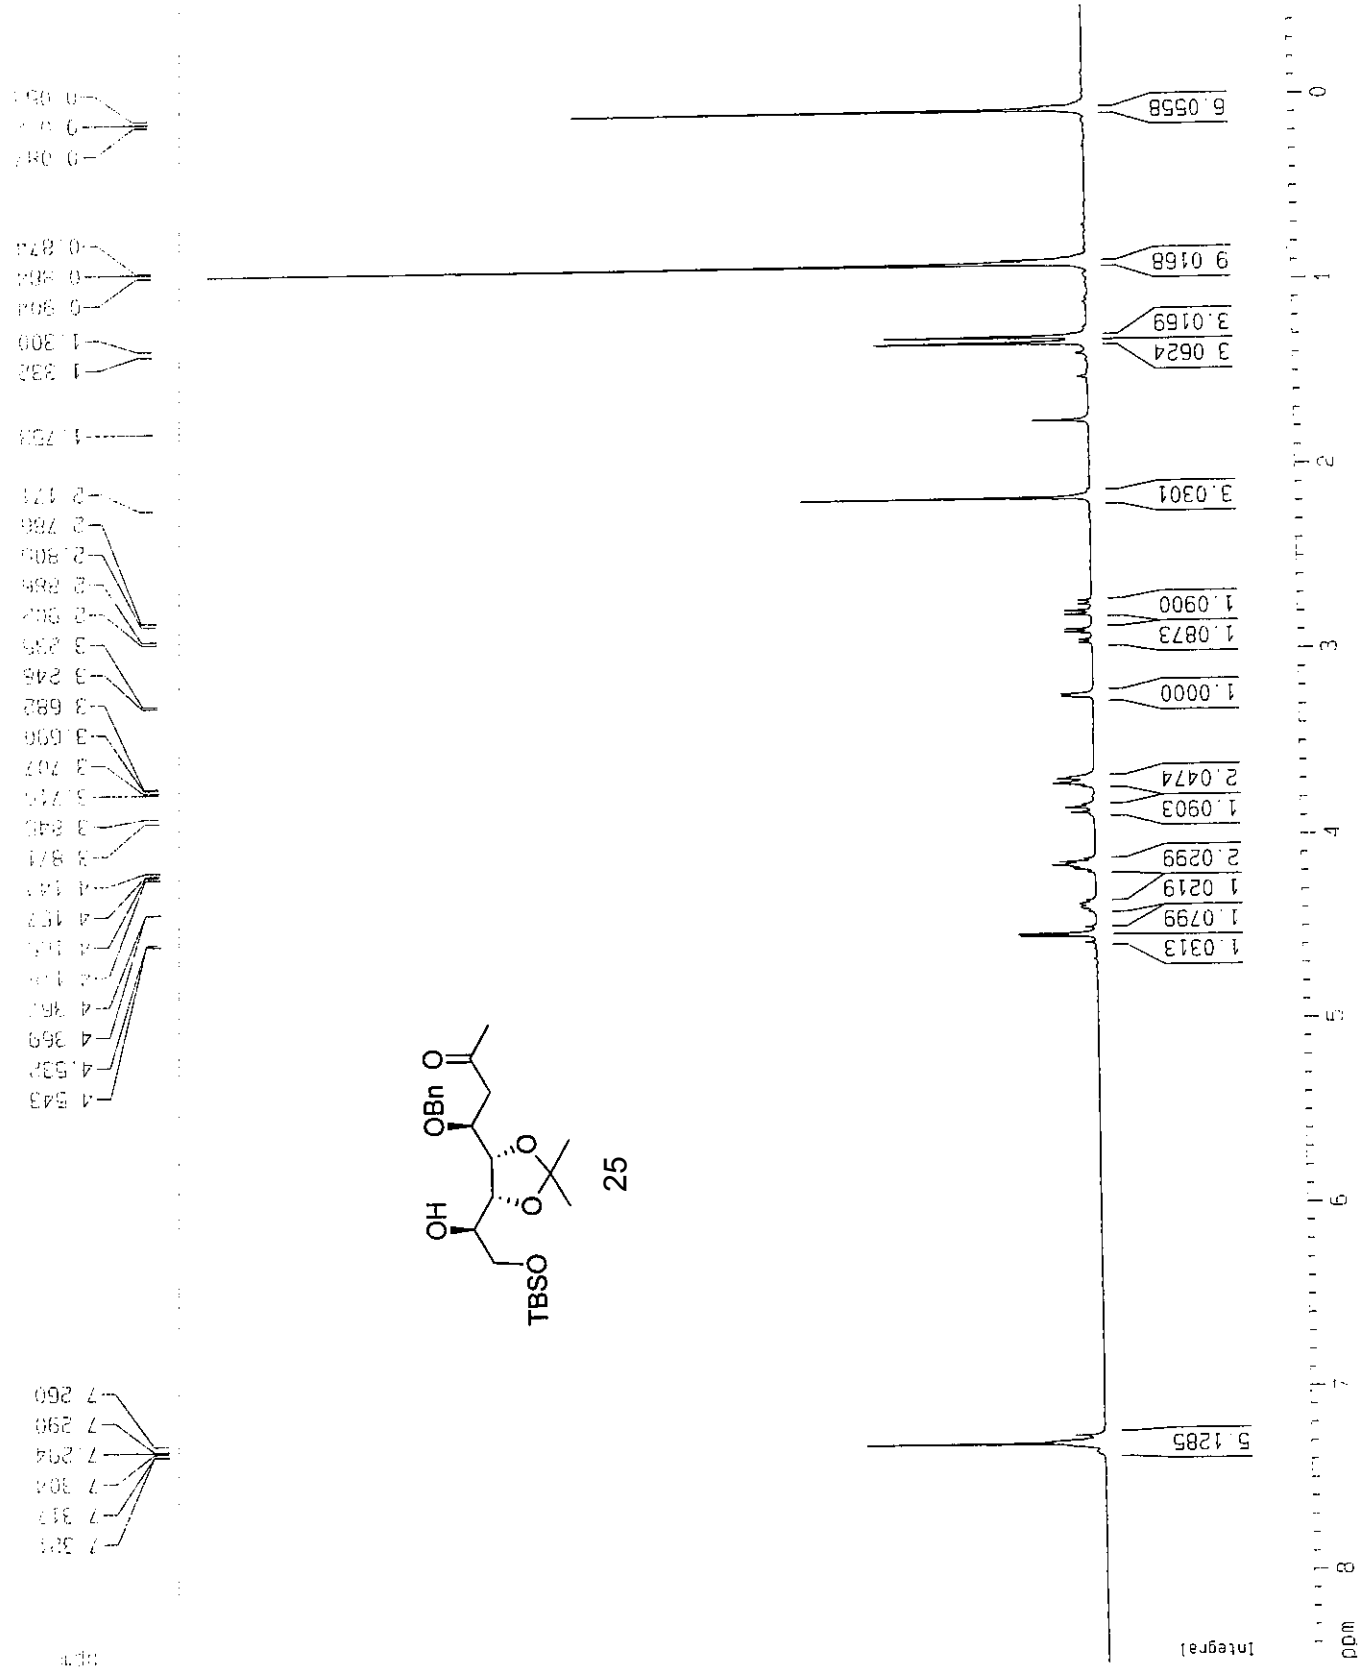



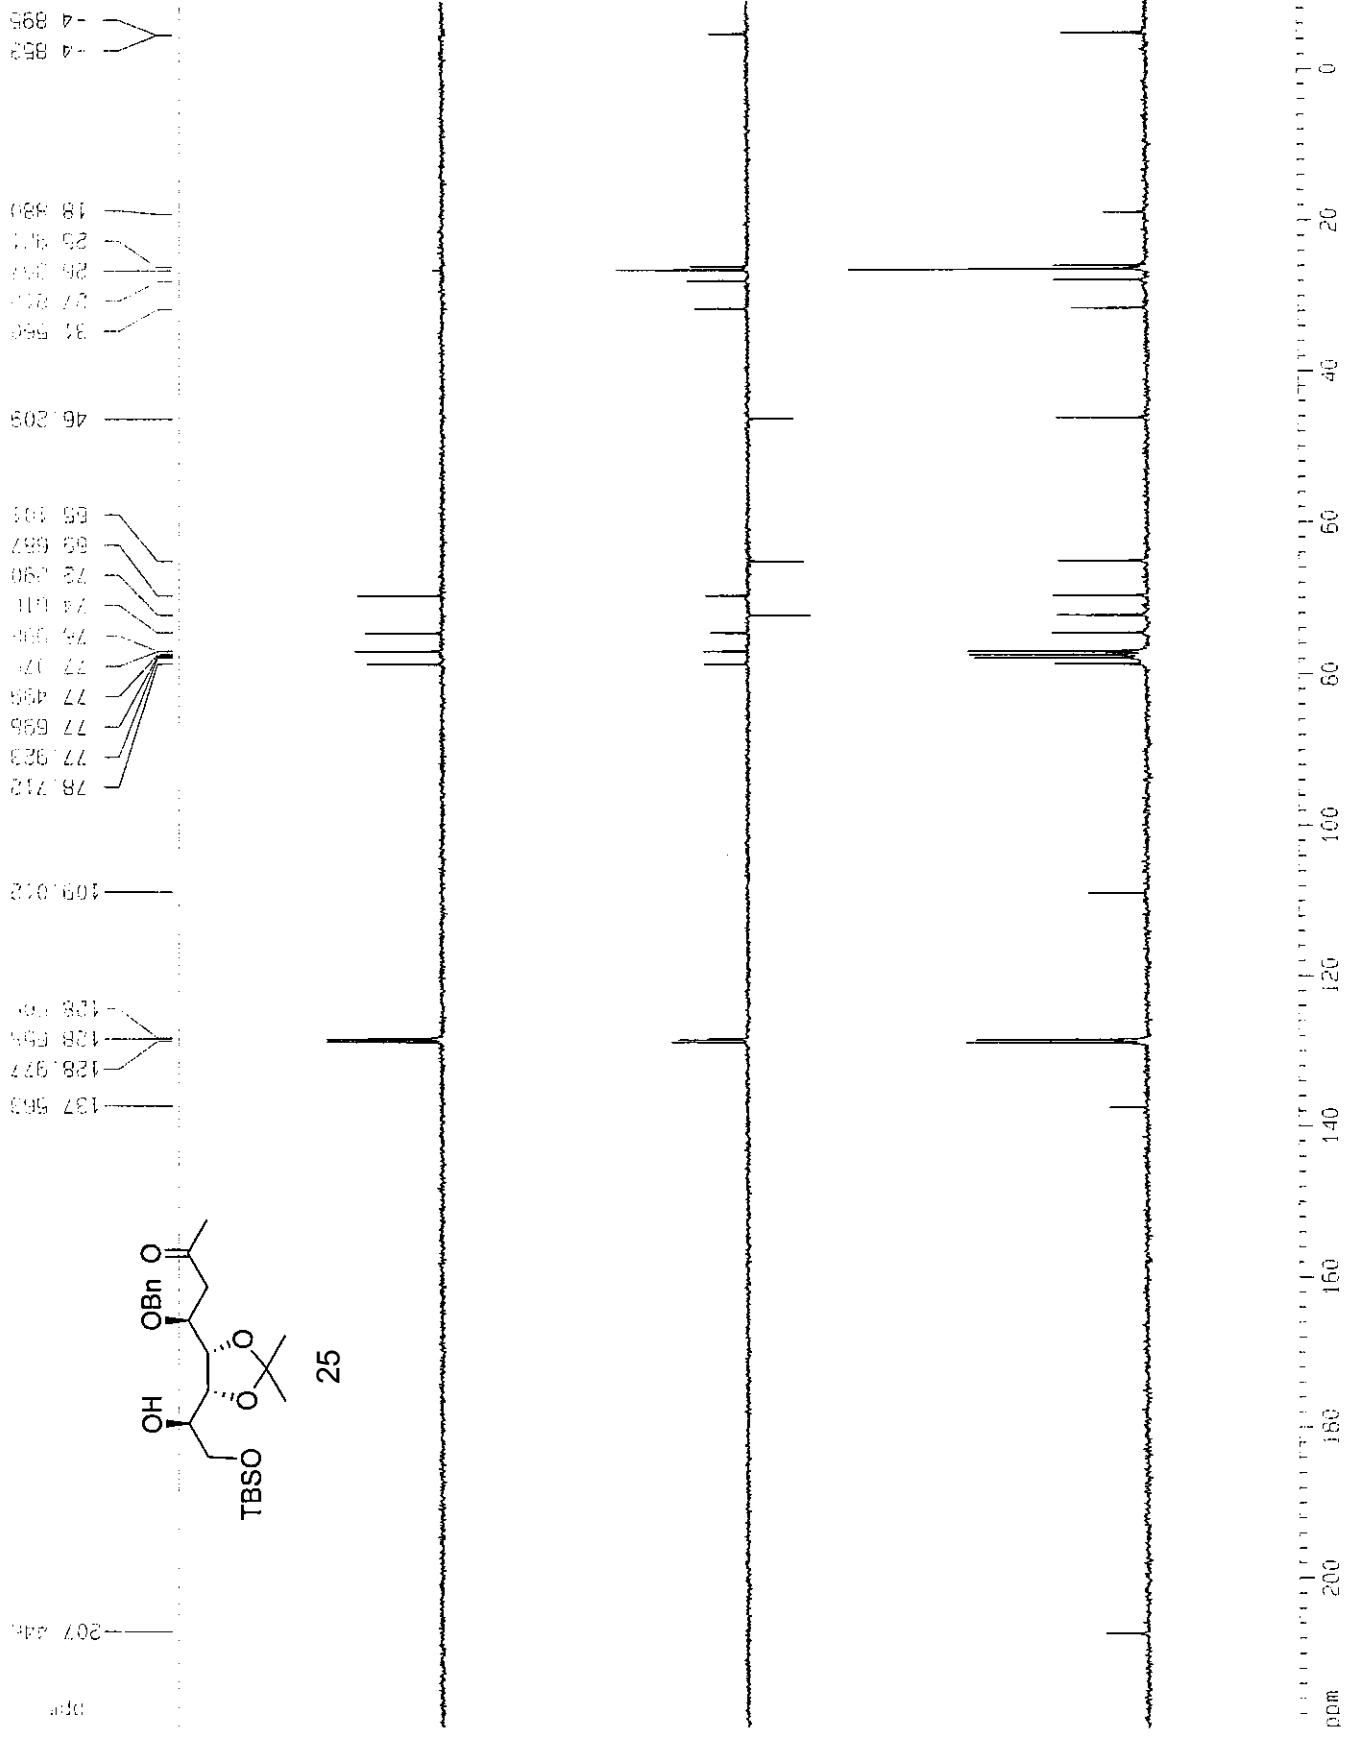

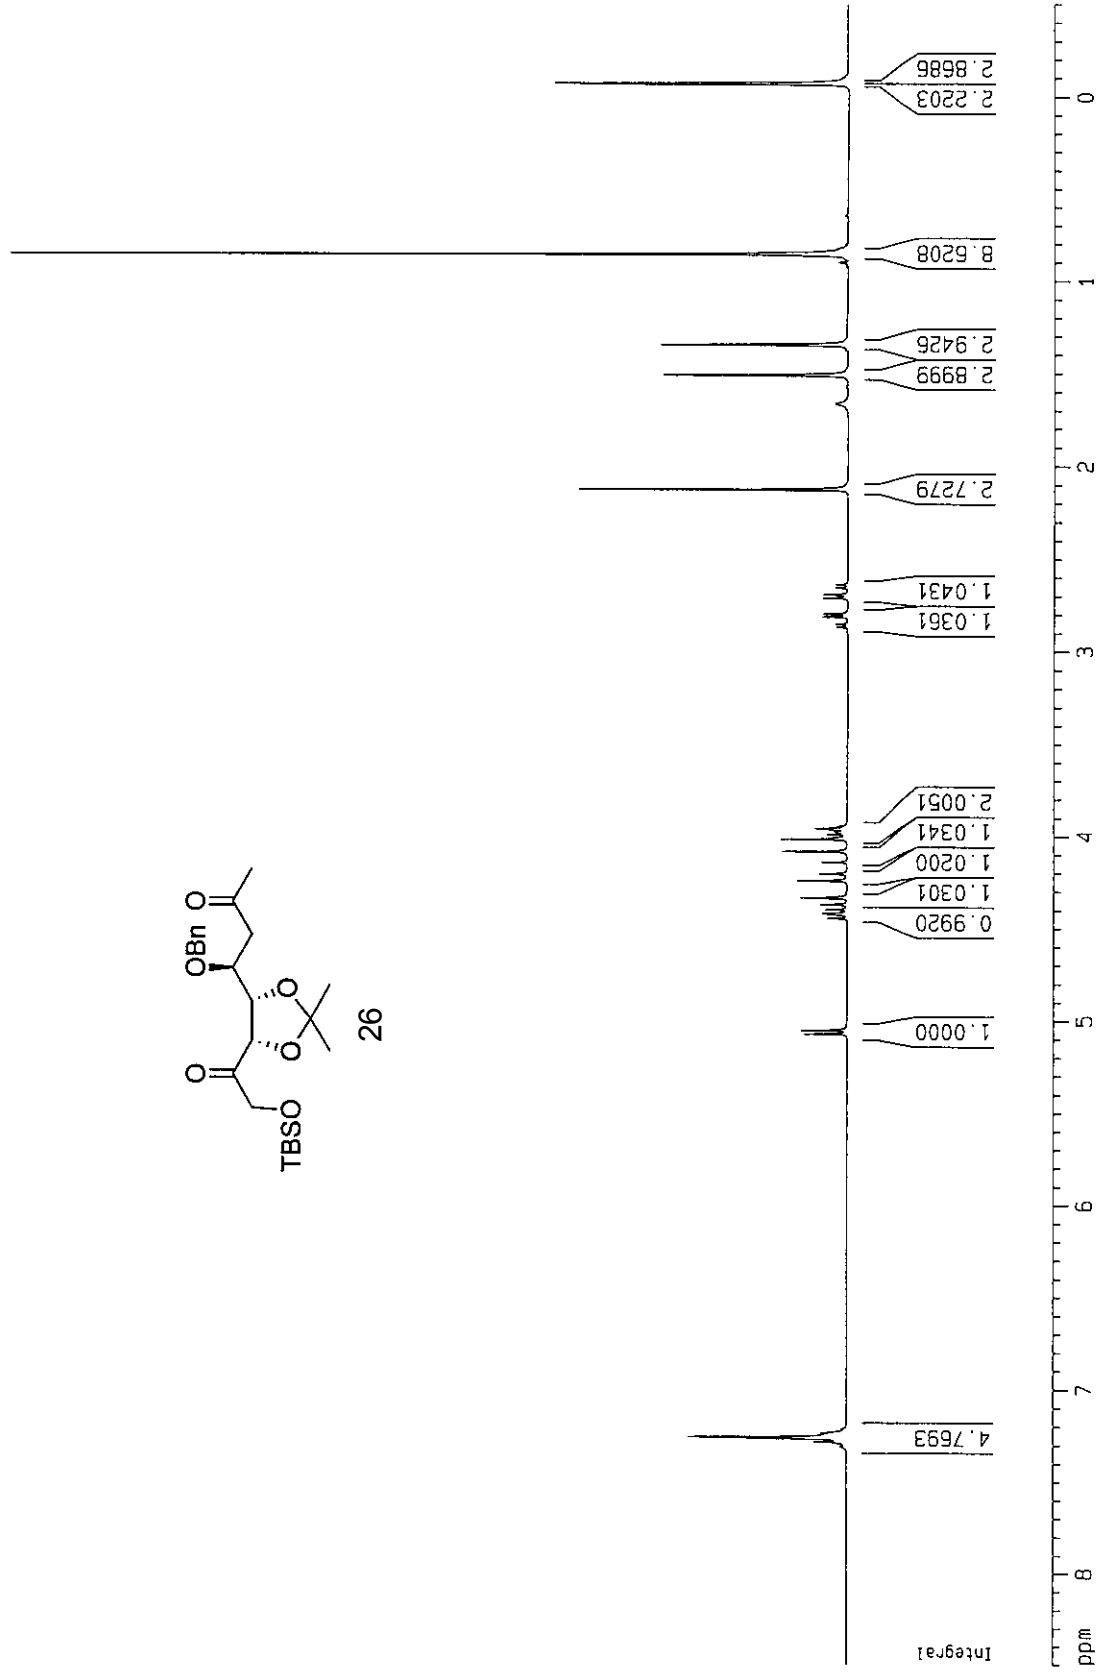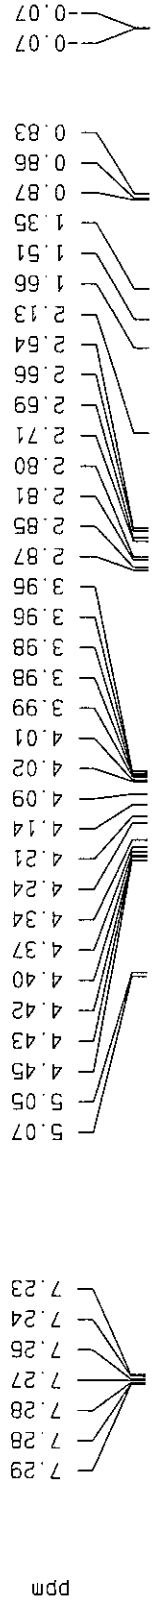

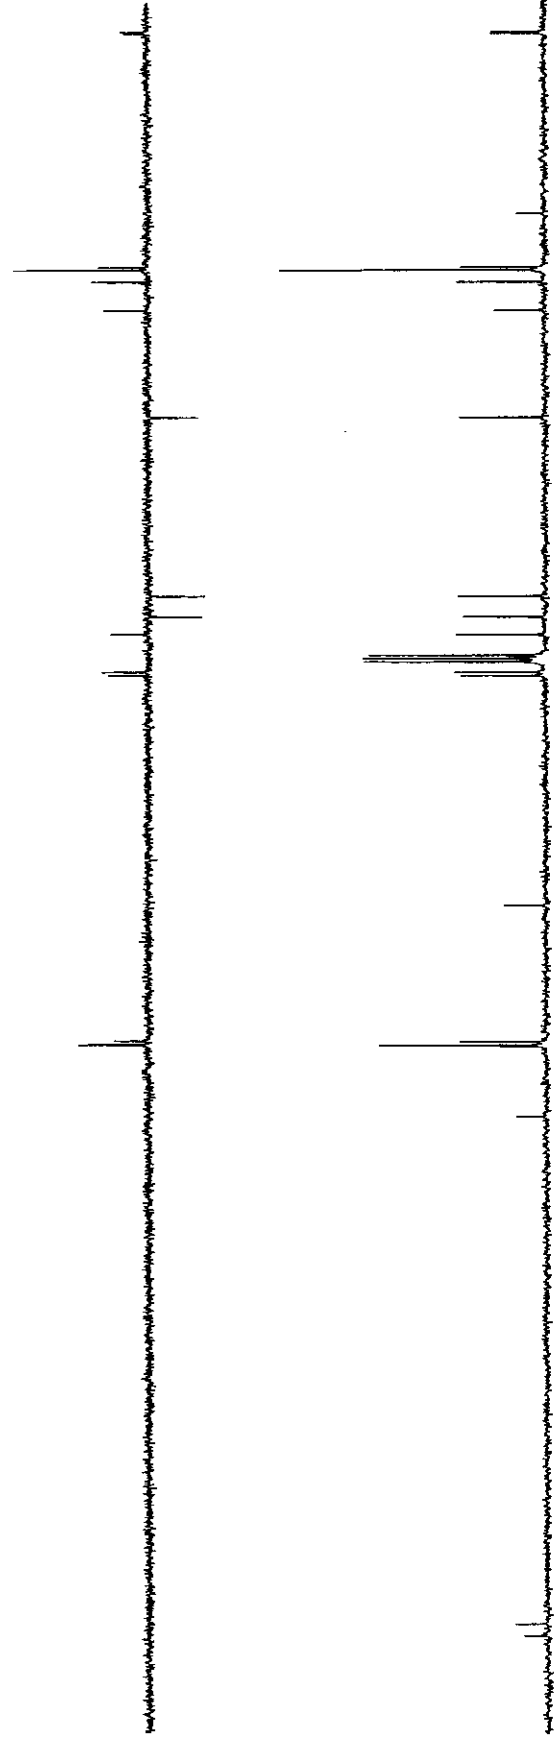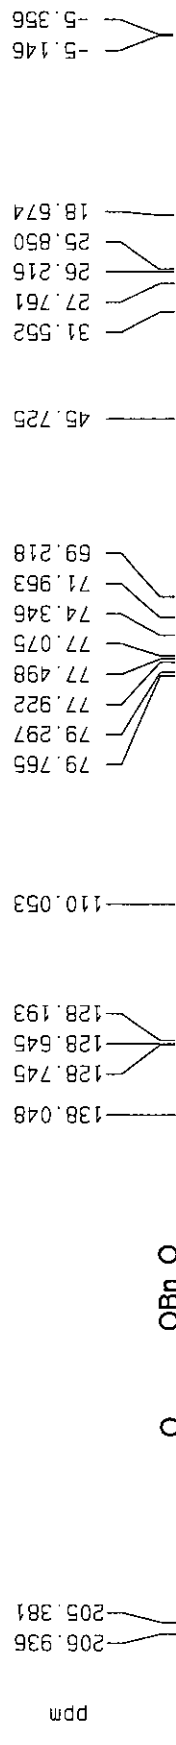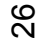

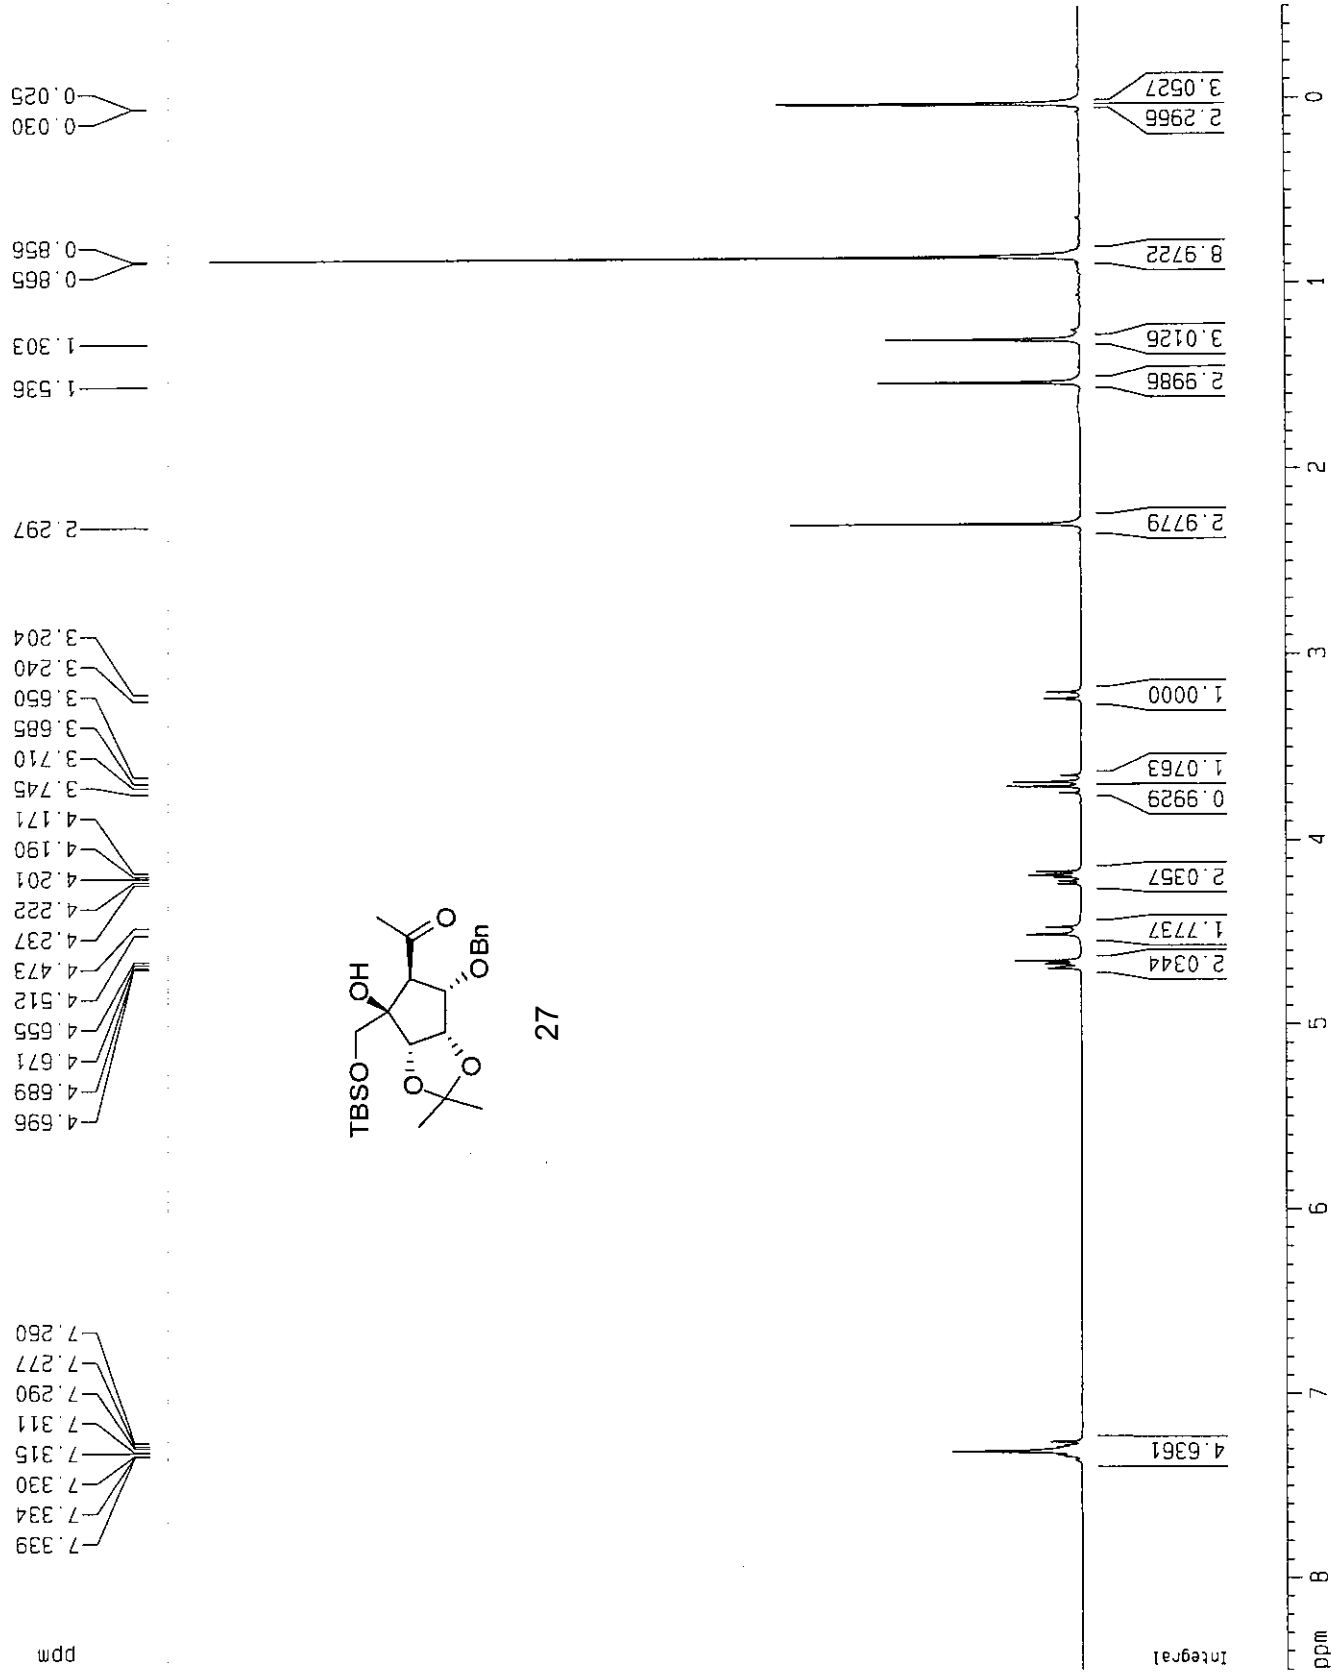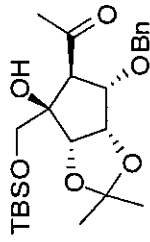

27

wdd

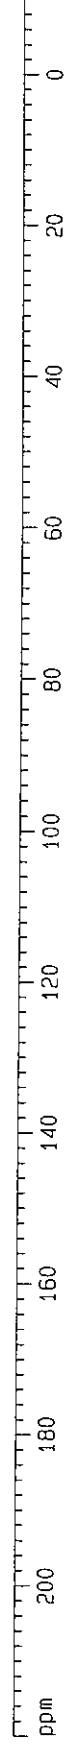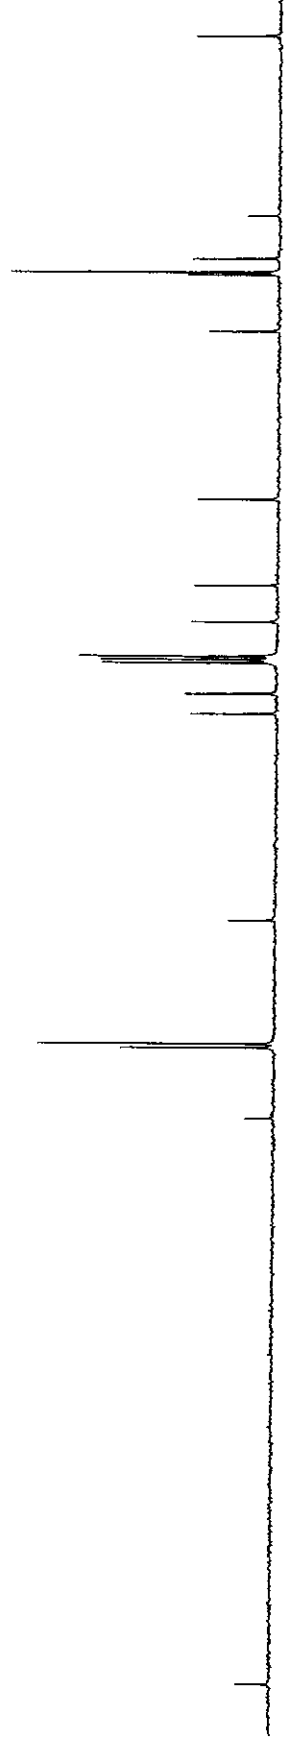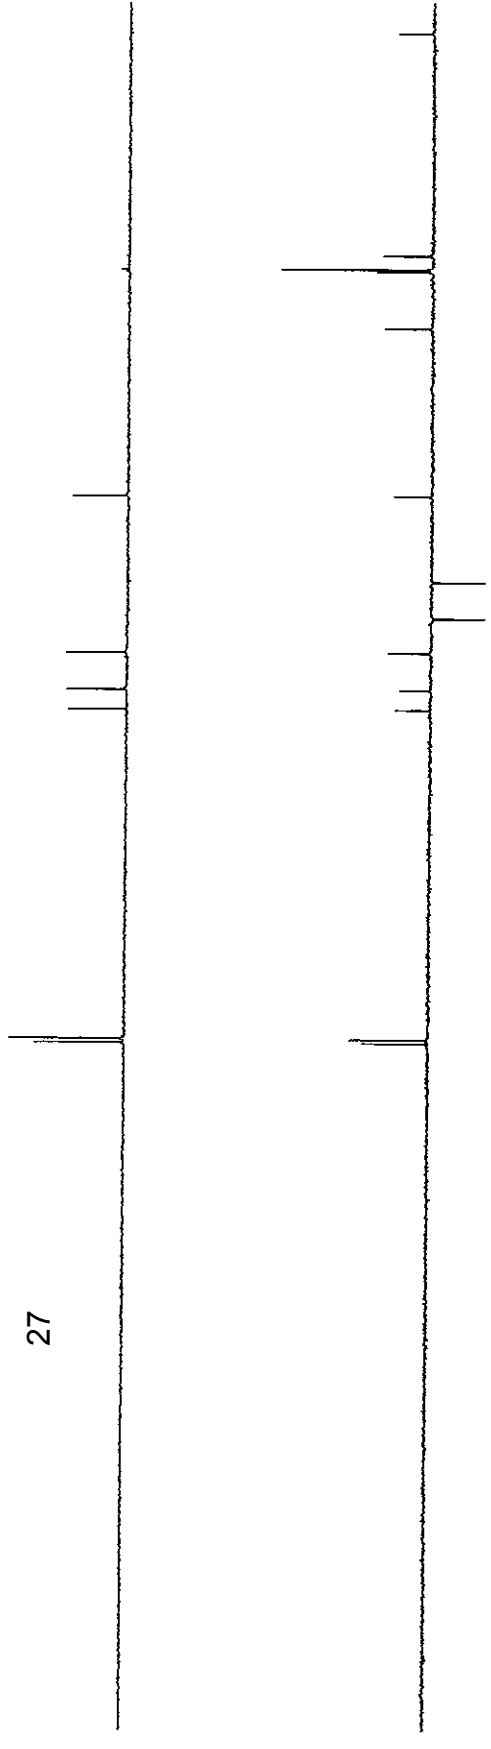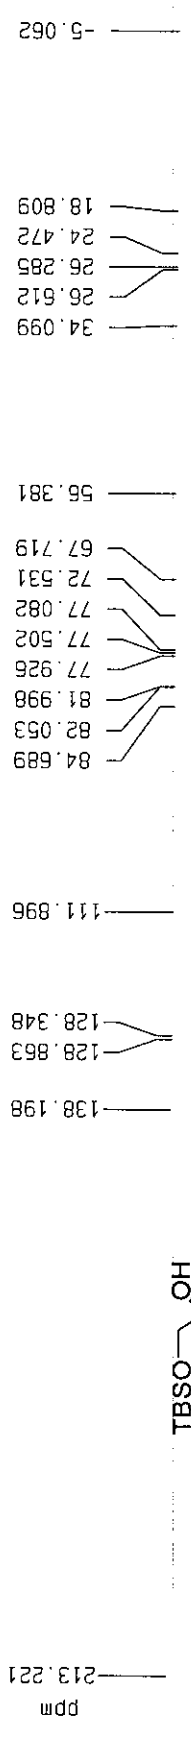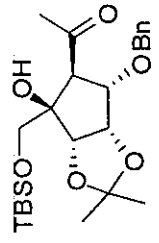

27

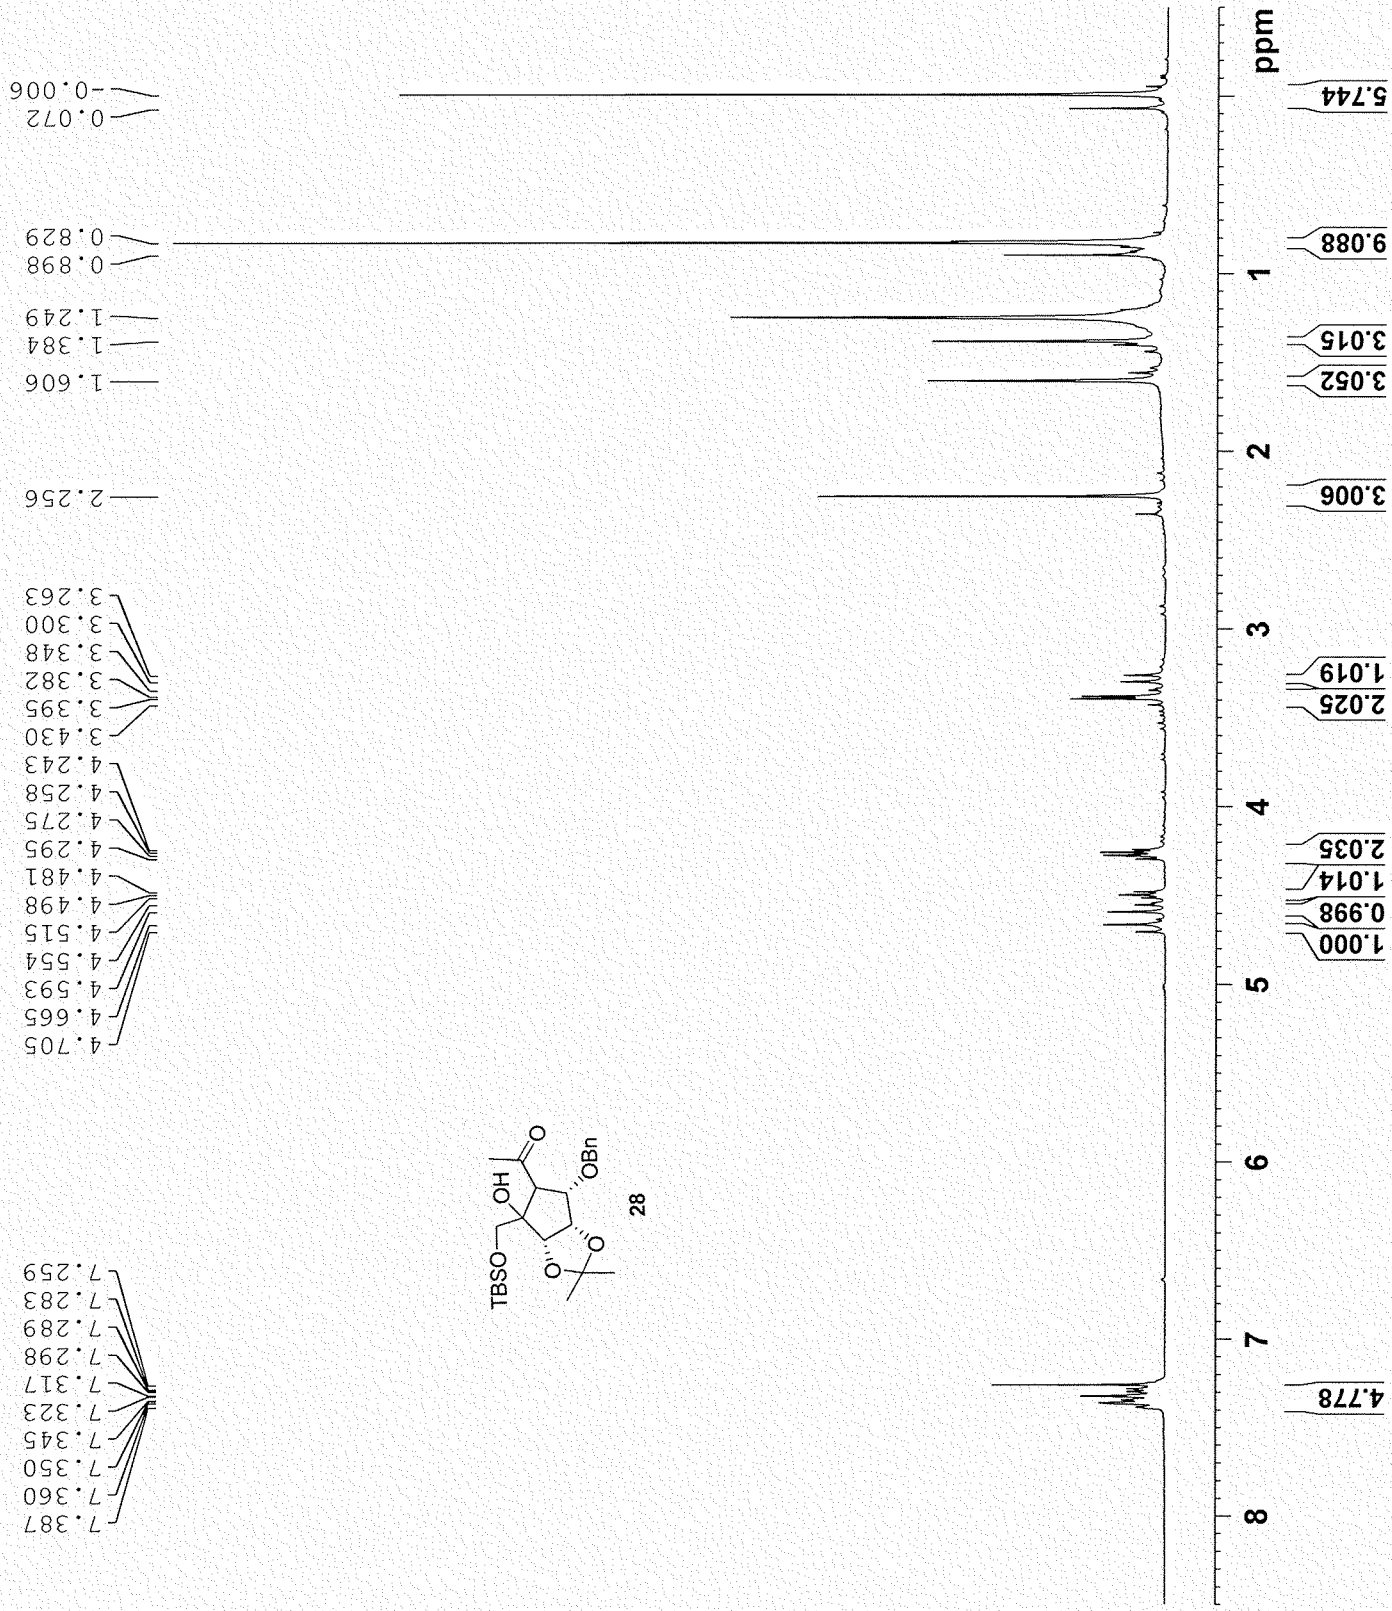

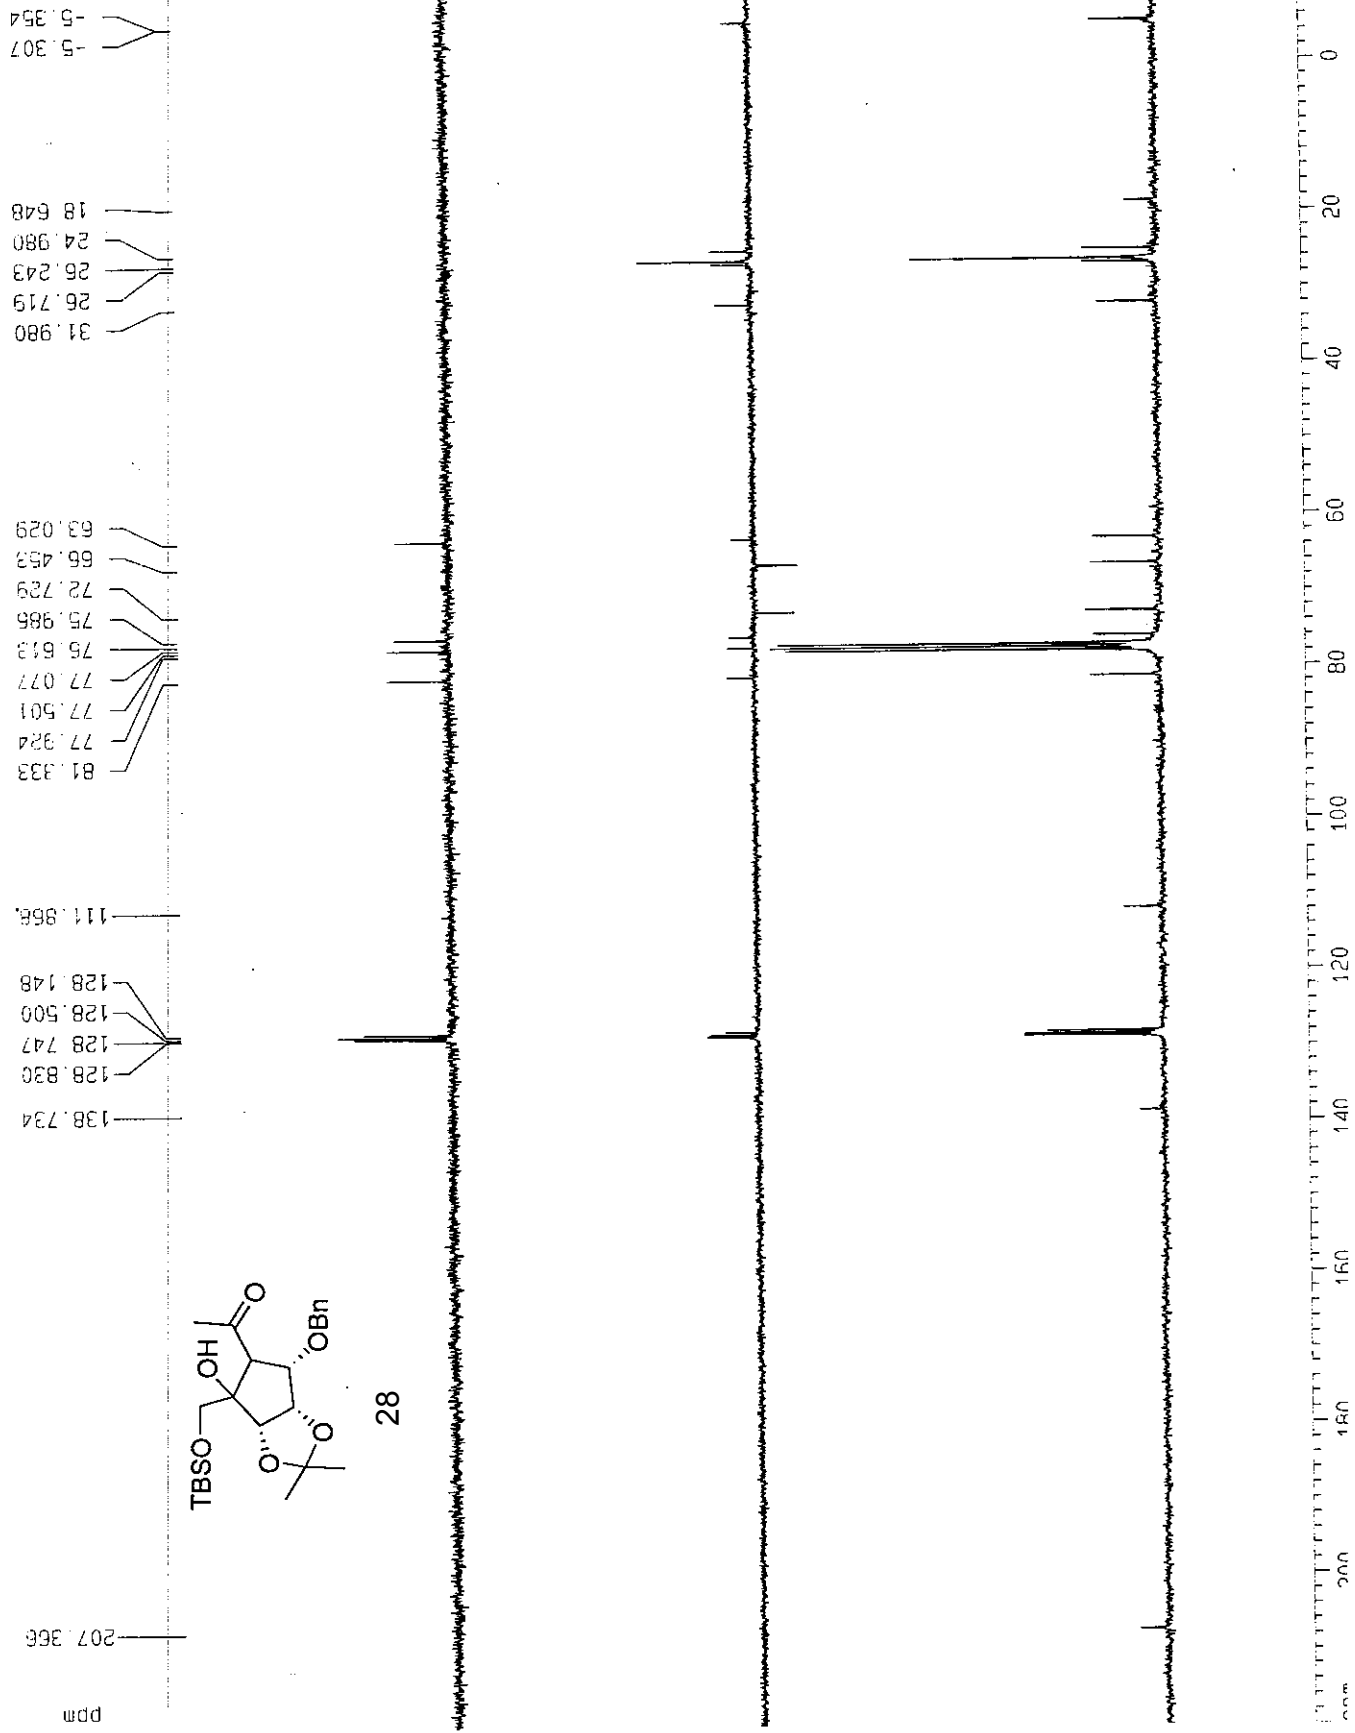

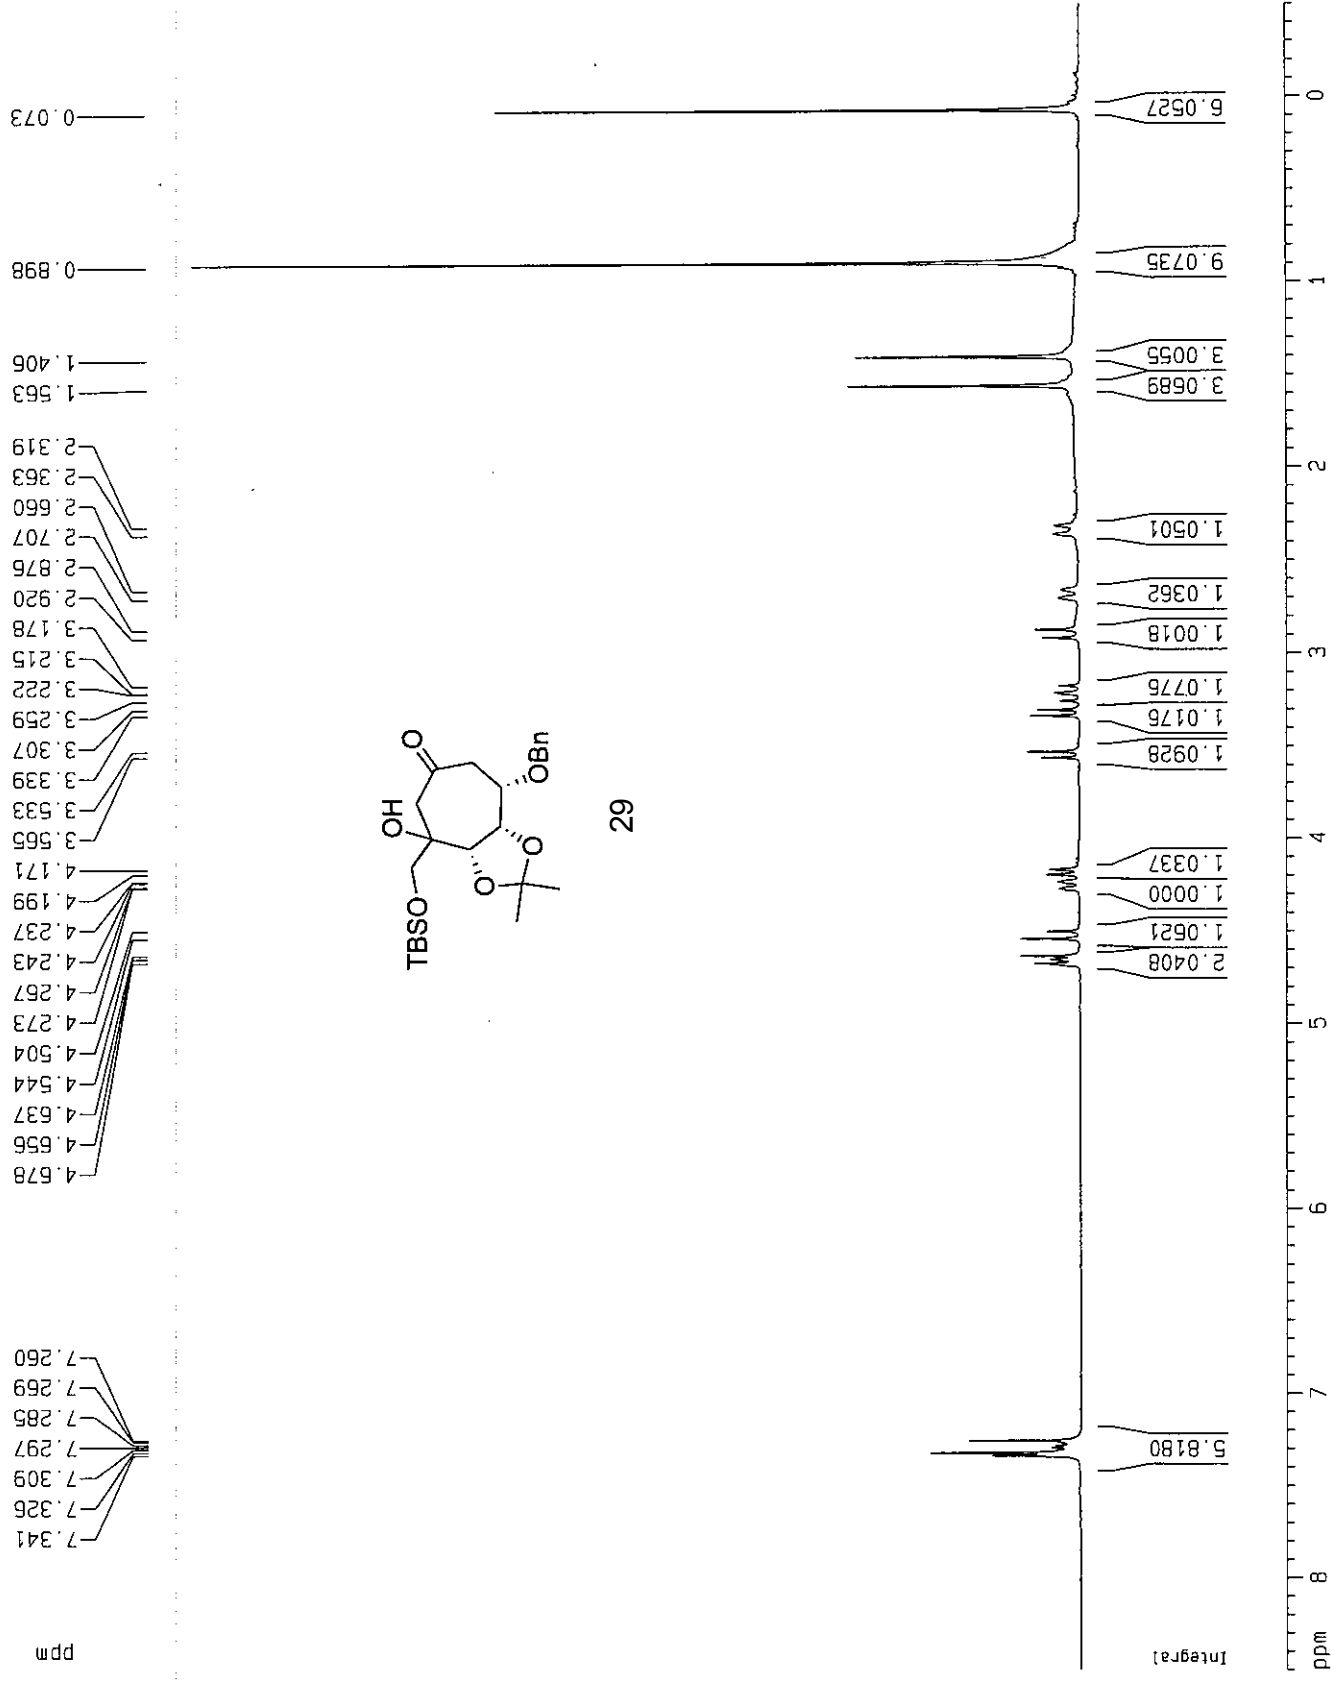





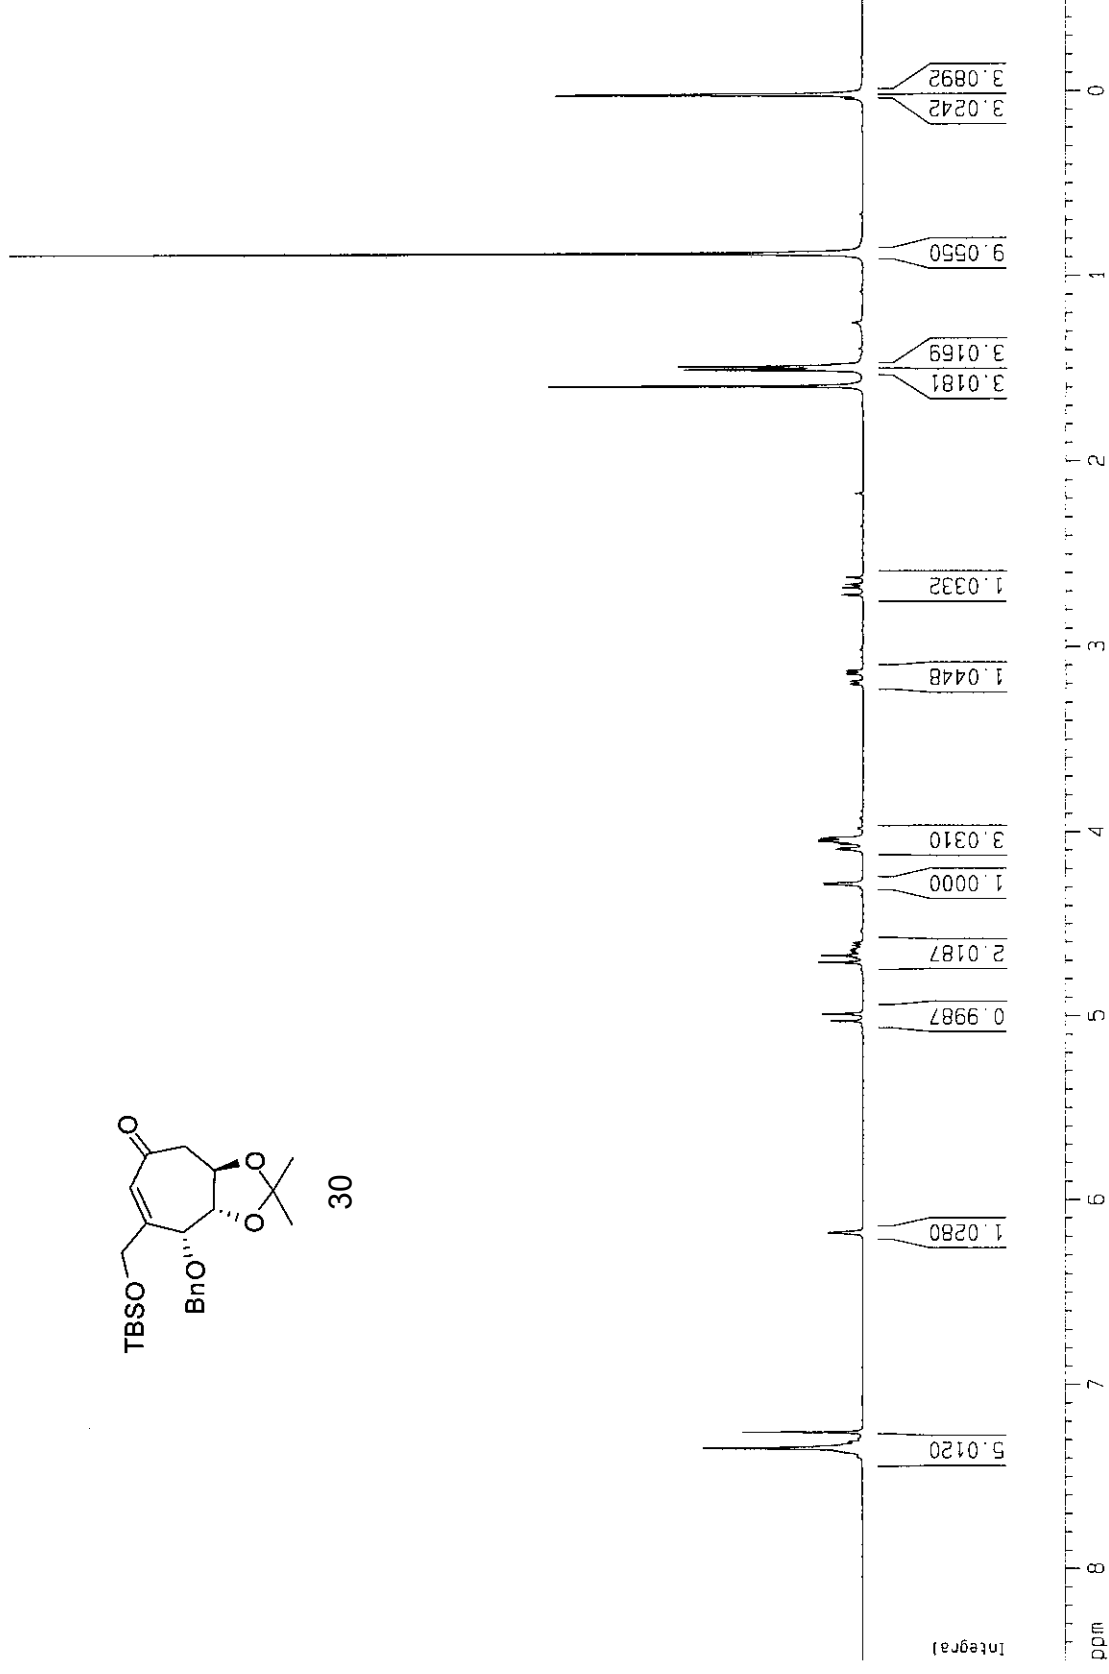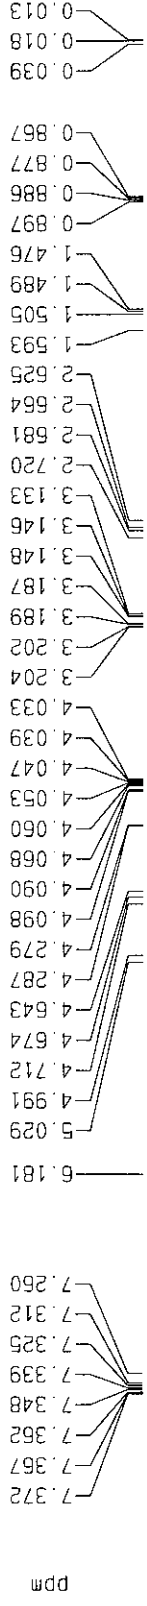

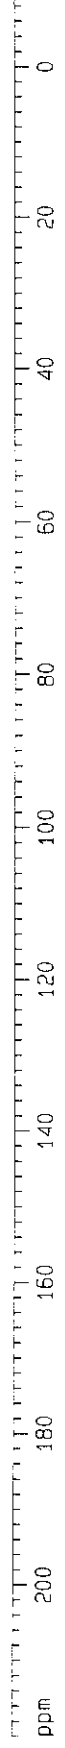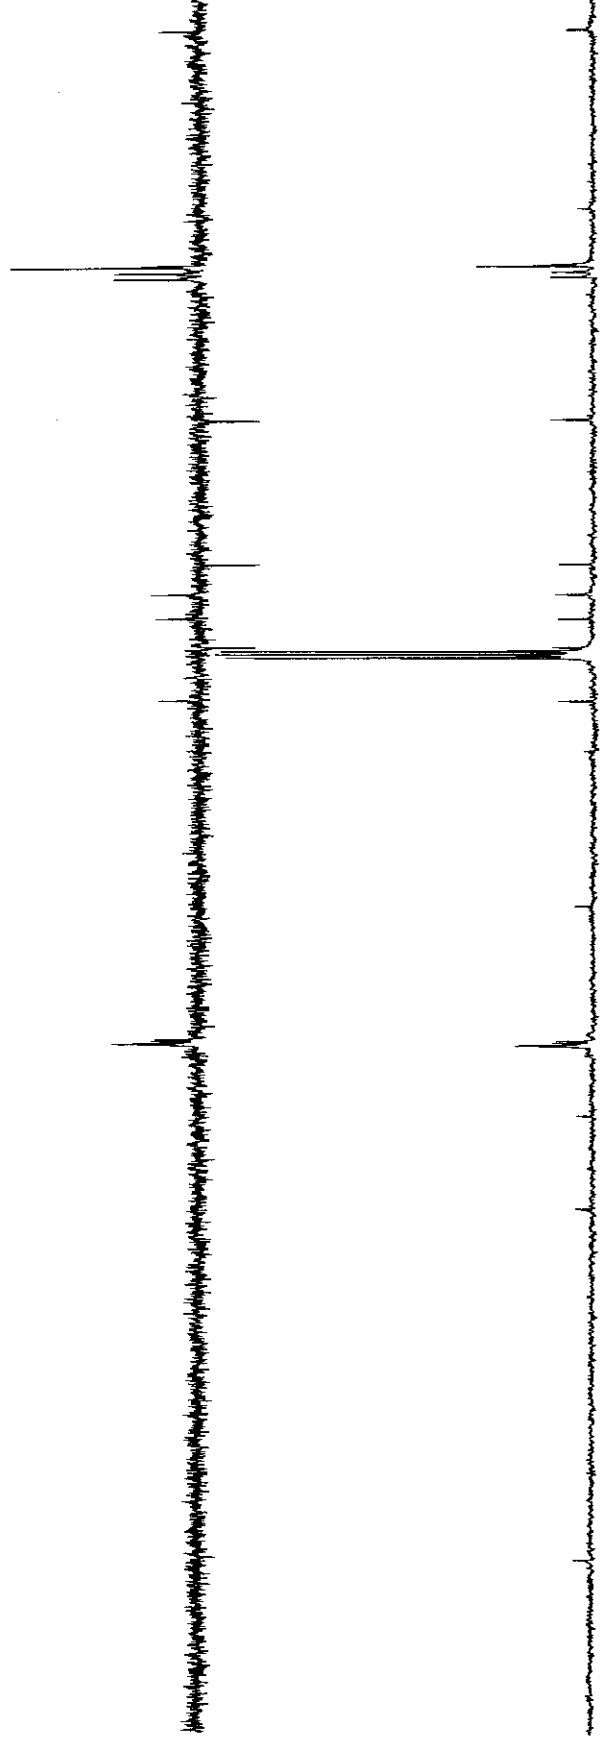

30

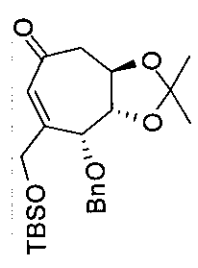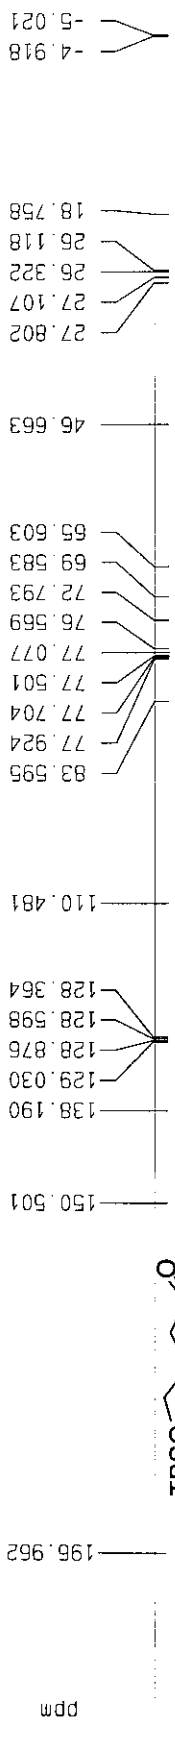

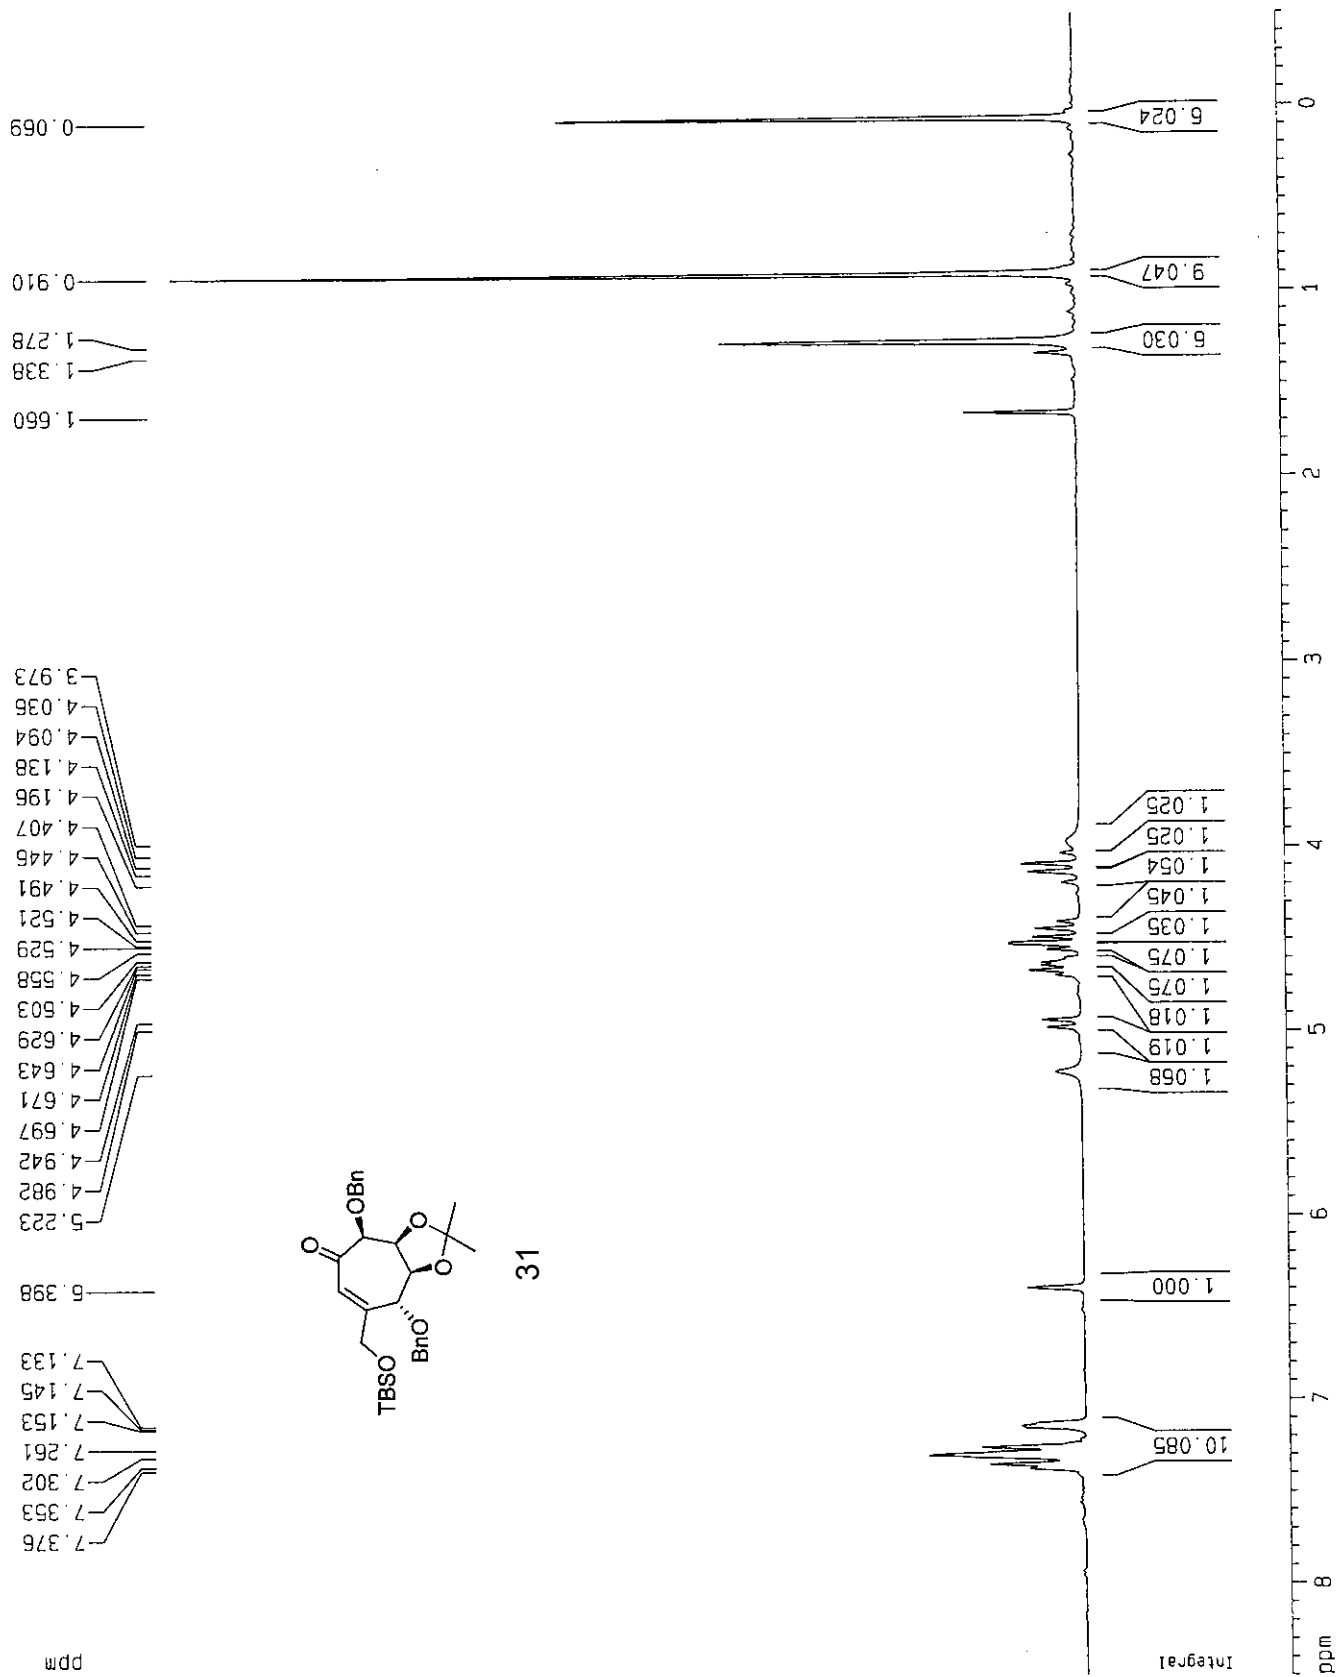

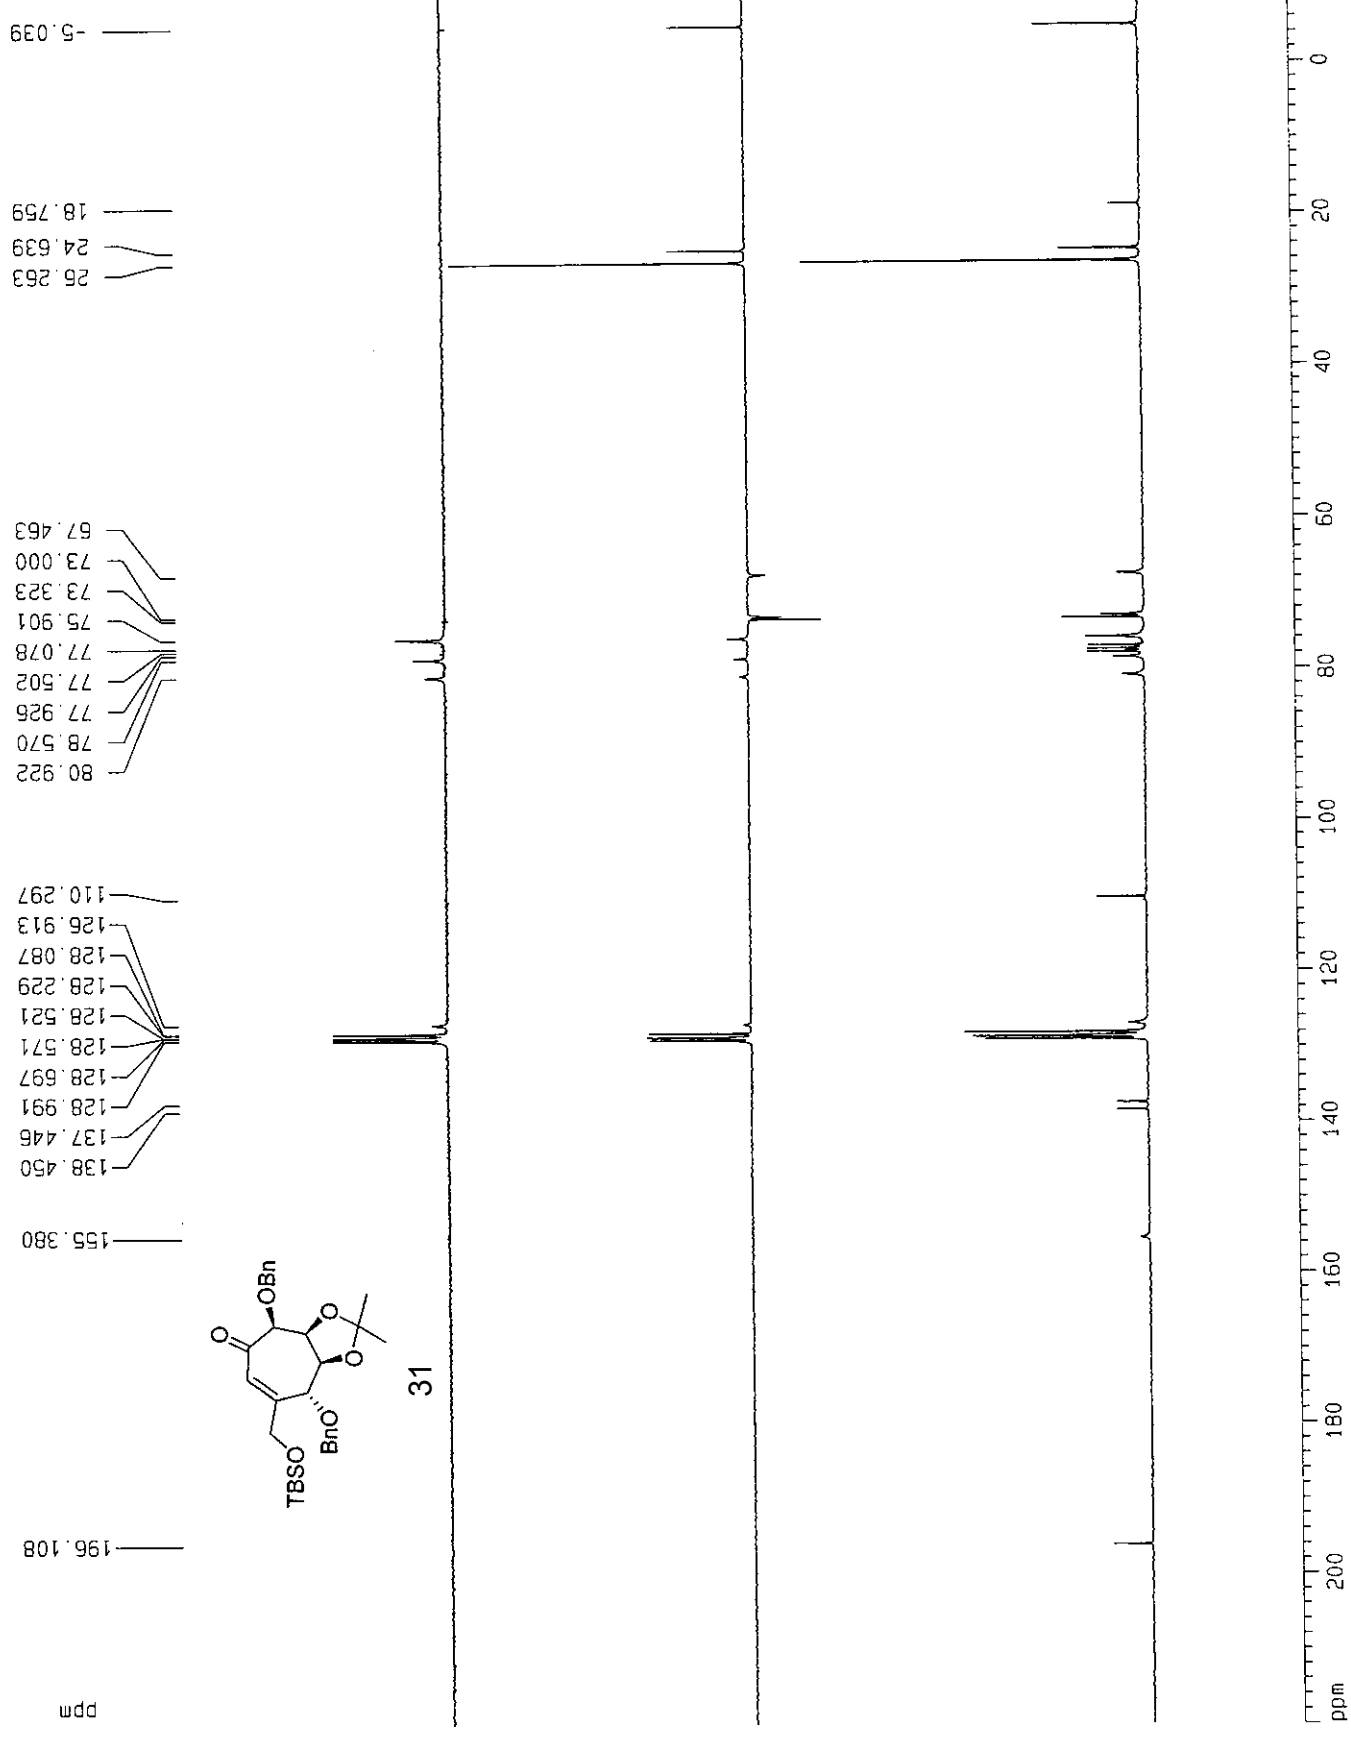

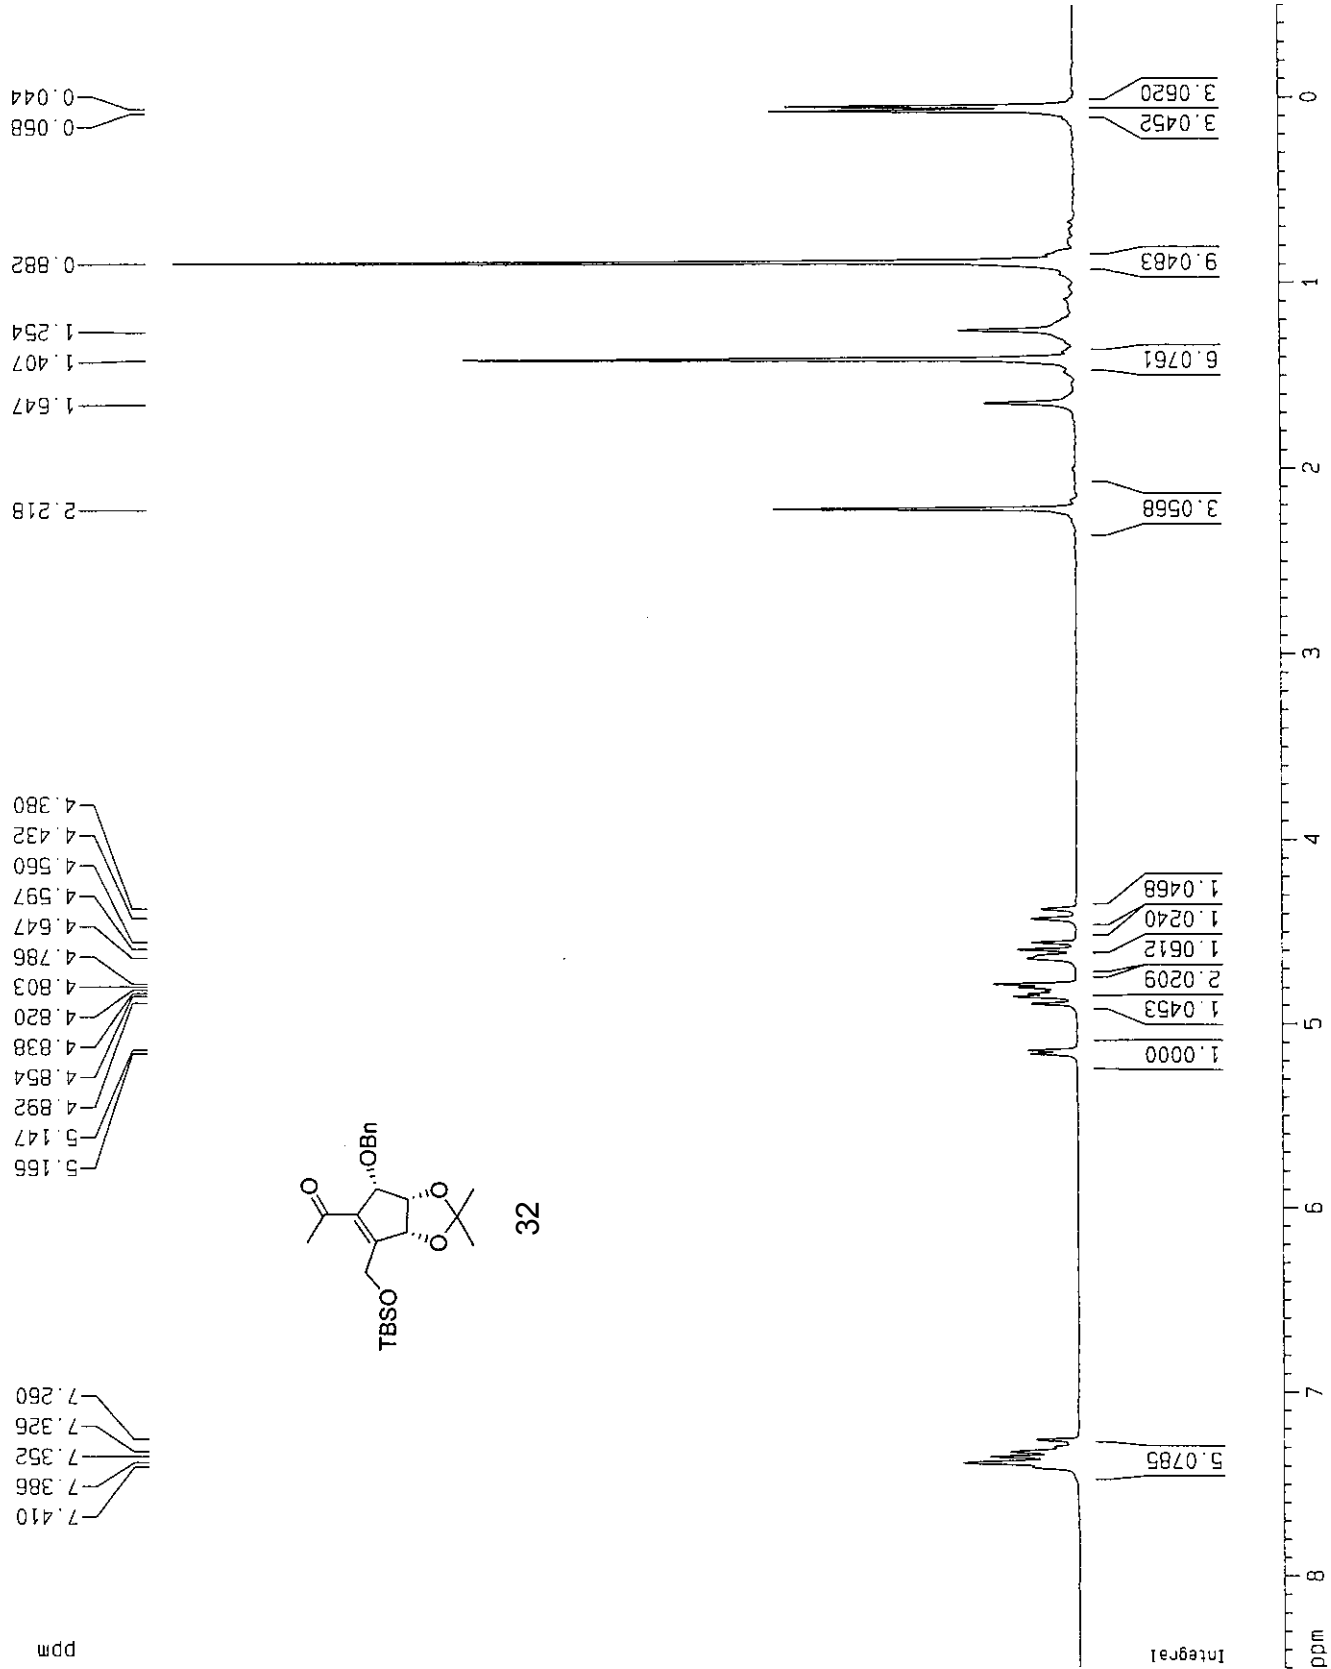

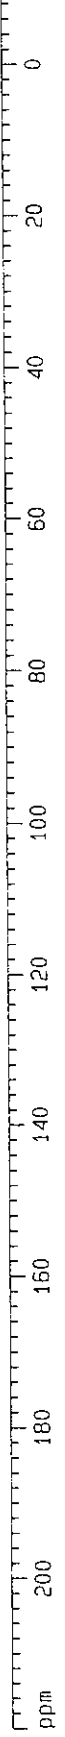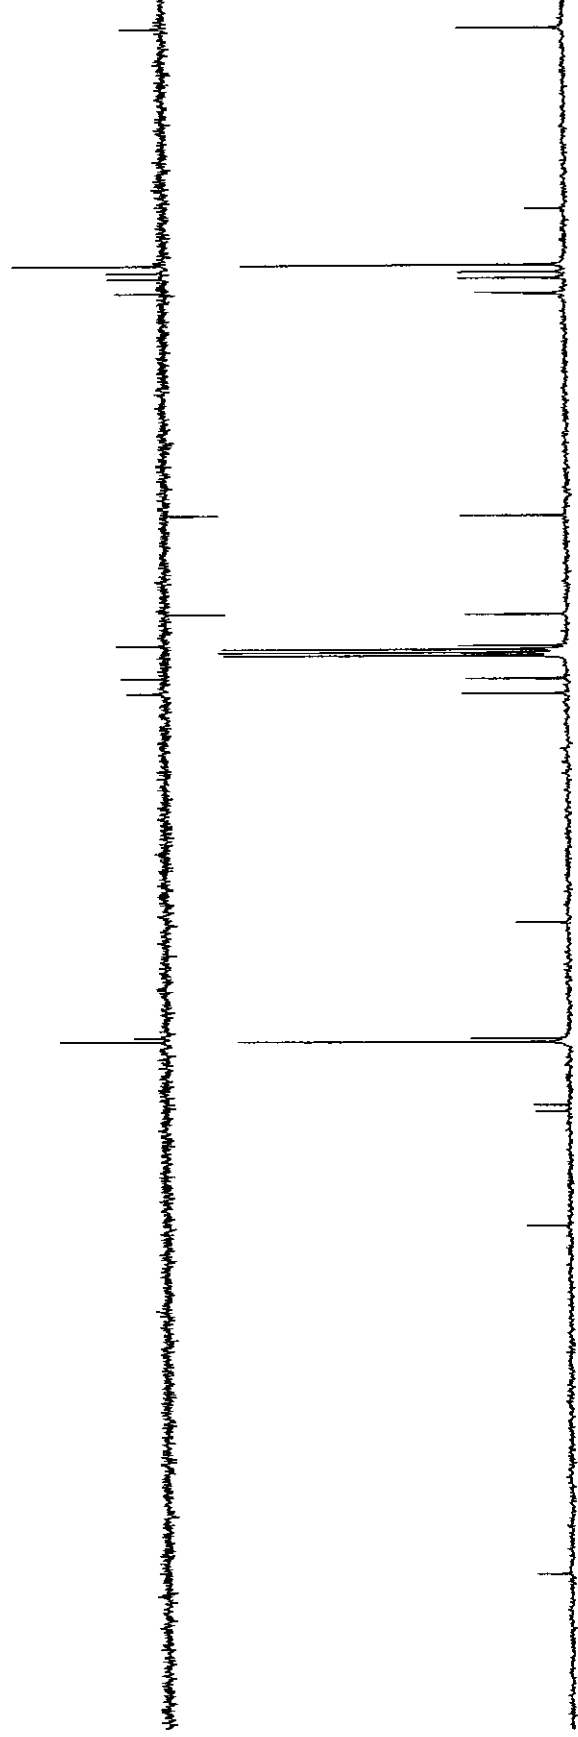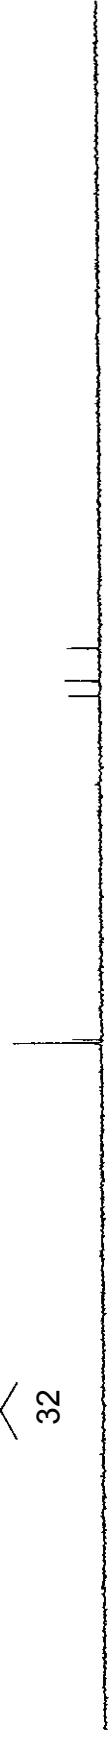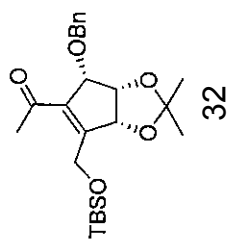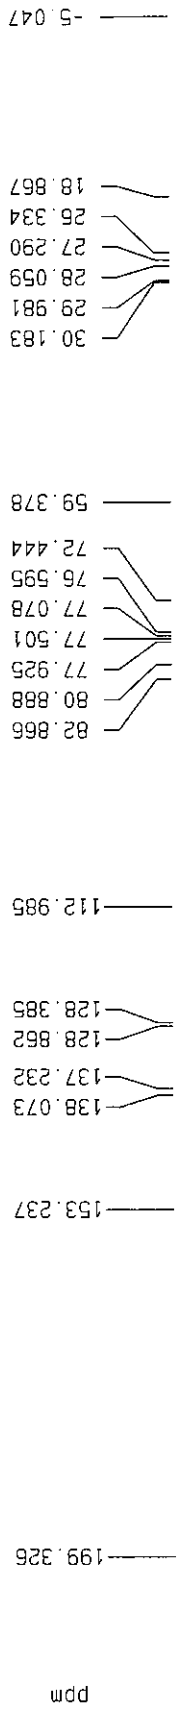

Supplement: c5ob00253b1.pdf [file c5ob00253b1.pdf]
